# Supplementary material for: Copper-catalyzed domino cyclization of anilines and cyclobutanone oxime: a scalable and versatile route to spirotetrahydroquinoline derivatives
Source: publisher site journal article supplement (doi:10.3762/bjoc.21.58), 2025-04-09
Supplement: Additional file 1 [file 1860-5397-21-58-S1.pdf]

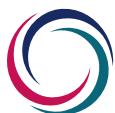

## Supporting Information

for

### **Copper-catalyzed domino cyclization of anilines and cyclobutanone oxime: a scalable and versatile route to spirotetrahydroquinoline derivatives**

Qingqing Jiang, Xinyi Lei, Pan Gao and Yu Yuan

*Beilstein J. Org. Chem.* **2025**, *21*, 749–754. doi:10.3762/bjoc.21.58

**Experimental procedures, characterization data for all new compounds, and NMR spectra of products**

## Table of contents

|                                                                         |     |
|-------------------------------------------------------------------------|-----|
| 1. General information.....                                             | S2  |
| 2. The synthesis of cyclobutanone oxime <sup>[1]</sup> .....            | S2  |
| 3. Reaction and method of cyclobutanone oxime with aniline .....        | S3  |
| 4. Gram scale reaction .....                                            | S4  |
| 5. Characterization data for spirotetrahydroquinoline derivatives ..... | S5  |
| 6. References .....                                                     | S37 |
| 7. <sup>1</sup> H and <sup>13</sup> C NMR spectra .....                 | S38 |

## 1. General information

All new compounds were fully characterized. All reactions and manipulations involving air-sensitive compounds were performed using standard Schlenk techniques. Anhydrous MeCN was purchased from Annaiji Chemical and was used as received.  $^1\text{H}$  and  $^{13}\text{C}$  NMR spectra were recorded on an Agilent DD2 400 MHz spectrometer. The chemical shifts in  $^1\text{H}$  NMR spectra were recorded relative to  $\text{CDCl}_3$  ( $\delta$  7.26). The chemical shifts in  $^{13}\text{C}$  NMR spectra were recorded relative to  $\text{CDCl}_3$  ( $\delta$  77.0). The high-resolution mass spectral (HRMS) data were obtained on a quadrupole-type Bruker Dalton MAXIS (APCI). Gas chromatography analyses were conducted with a Shimadzu GC-2014 equipped with ULBON HR-1 glass capillary column (Shinwa Chemical Industries) and an FID detector. Unless otherwise noted, materials obtained from commercial suppliers were used without further purification.

## 2. The synthesis of cyclobutanone oxime<sup>[1]</sup>

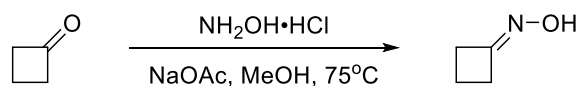

To a mixture of hydroxylamine hydrochloride (1.2 equiv), sodium acetate (2.2 equiv), methanol (100mL) in a 250-mL two-necked flask was added cyclobutanone (1.0 equiv) and the mixture was stirred at  $75^\circ\text{C}$  for 12 h. The reaction mixture was cooled to room temperature and then methanol

was removed under vacuum and the resulting mixture was extracted with diethyl ether. The organic layer was washed with water and dried over  $\text{MgSO}_4$ . The solvent was removed under reduced pressure and the crude material was subjected to column chromatography to afford cyclobutanone oxime in 95% yield.<sup>[1]</sup>

### 3. Reaction and method of cyclobutanone oxime with aniline

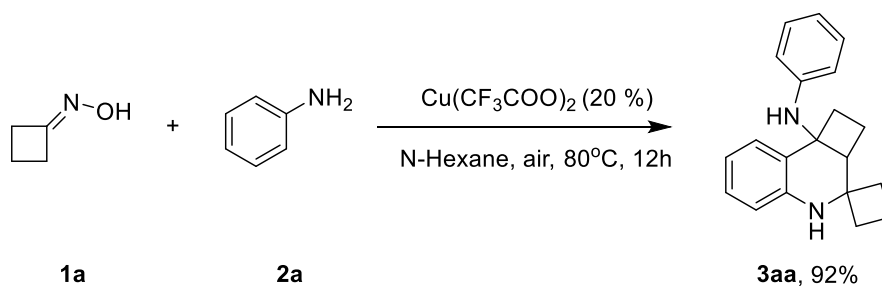

A dried straight reaction tube was charged with **1** (0.4 mmol), **2** (0.2 mmol), and  $\text{Cu}(\text{CF}_3\text{COO})_2$  (11.58 mg, 20 mol %), then dried *n*-hexane (2 mL) was added by using a syringe. The reaction mixture was stirred at  $80^\circ\text{C}$  for 12 h. After quenching the reaction with aqueous  $\text{NH}_4\text{Cl}$  (2 mL), the crude product was extracted with ethyl acetate ( $3 \times 10$  mL). The combined organic phases were dried over anhydrous  $\text{Na}_2\text{SO}_4$  and concentrated under vacuum. The residue was purified by flash chromatography on neutral alumina to give the desired product **3**.

#### 4. Gram scale reaction

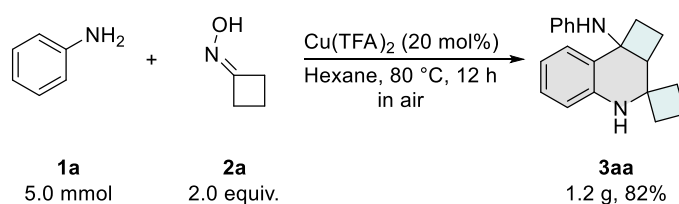

A dried two-necked flask was charged with **1a** (10 mmol), **2a** (5 mmol), and  $\text{Cu}(\text{CF}_3\text{COO})_2$  (145 mg, 20 mol %), then dried *n*-hexane (100 mL) was added by using a syringe. The reaction mixture was stirred at 80 °C for 12 h. After quenching the reaction with aqueous  $\text{NH}_4\text{Cl}$  (20 mL), the crude product was extracted with ethyl acetate ( $3 \times 10$  mL). The combined organic phases were dried over anhydrous  $\text{Na}_2\text{SO}_4$  and concentrated under vacuum. The residue was purified by flash chromatography on neutral alumina to give the desired product **3aa** (yellow solid, 1.2 g, 82%).

## 5. Characterization data for spirotetrahydroquinoline derivatives

**(8b'*S*)-*N*-Phenyl-2',2a'-dihydro-1'*H*-spiro[cyclobutane-1,3'-cyclobuta[*c*]quinolin]-8b'(4'*H*)-amine (3aa)<sup>[2]</sup>**

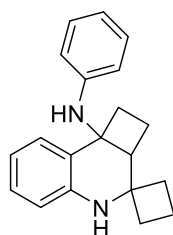

**3aa**, 92%

The general procedure was applied to aniline (0.2 mmol), cyclobutanone oxime (0.4 mmol), Cu(CF<sub>3</sub>COO)<sub>2</sub> (11.58 mg, 0.04 mmol), *n*-hexane (2 mL) at 80 °C for 12 h. The crude product was purified by column chromatography on neutral alumina (EtOAc/PE 1:60) to afford the title compound as a yellow solid (27 mg, 92% yield). <sup>1</sup>H NMR (400 MHz, CDCl<sub>3</sub>) δ = 7.32 (dd, *J* = 7.6, 1.5 Hz, 1H), 7.05 (td, *J* = 7.3, 1.1 Hz, 3H), 6.71 (td, *J* = 7.5, 1.2 Hz, 1H), 6.65 (td, *J* = 7.7, 1.1 Hz, 2H), 6.48 (dd, *J* = 8.7, 1.1 Hz, 2H), 4.05 (s, 2H), 2.99 (t, *J* = 8.5 Hz, 1H), 2.39 – 2.30 (m, 1H), 2.20 (dddd, *J* = 11.5, 9.6, 4.6, 1.0 Hz, 1H), 2.05 – 1.83 (m, 5H), 1.77 – 1.68 (m, 1H), 1.68 – 1.58 (m, 2H). <sup>13</sup>C NMR (101 MHz, CDCl<sub>3</sub>) δ = 145.77, 142.98, 128.79, 127.63, 127.36, 126.94, 118.92, 117.54, 115.37, 56.50, 54.77, 50.45, 37.83, 37.52, 33.84, 15.49, 12.66.

**7'-Fluoro-*N*-(4-fluorophenyl)-2',2a'-dihydro-1'*H*-spiro[cyclobutane-1,3'-cyclobuta[*c*]quinolin]-8b'(4'*H*)-amine (3ba)<sup>[2]</sup>**

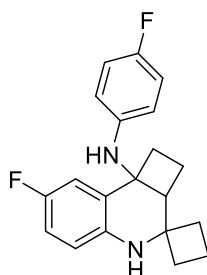

**3ba**, 62%

The general procedure was applied to 4-fluoroaniline (0.2 mmol), cyclobutanone oxime (0.4 mmol), Cu(CF<sub>3</sub>COO)<sub>2</sub> (11.58 mg, 0.04 mmol), *n*-hexane (2 mL) at 80 °C for 12 h. The crude product was purified by column chromatography on neutral alumina (EtOAc/PE 1:60) to afford the title compound as a yellow liquid (21 mg, 62% yield). <sup>1</sup>H NMR (400 MHz, CDCl<sub>3</sub>) δ = 7.05 (dd, *J* = 9.7, 3.0 Hz, 1H), 6.80 – 6.73 (m, 3H), 6.58 (dd, *J* = 8.7, 4.7 Hz, 1H), 6.41 – 6.35 (m, 2H), 3.92 (s, 2H), 2.88 – 2.78 (m, 1H), 2.24 – 2.13 (m, 2H), 2.06 – 1.88 (m, 3H), 1.83 – 1.72 (m, 3H), 1.61 (dtd, *J* = 17.2, 8.9, 8.4, 3.0 Hz, 2H). <sup>13</sup>C NMR (101 MHz, CDCl<sub>3</sub>) δ 157.96, 155.61, 141.70, 139.28, 129.12, 116.77, 116.32, 115.40, 114.43, 112.96, 57.05, 55.08, 50.23, 37.63, 37.49, 33.56, 15.47, 12.63.

**7'-Chloro-*N*-(4-chlorophenyl)-2',2a'-dihydro-1'*H*-spiro[cyclobutane-1,3'-cyclobuta[*c*]quinolin]-8b'(4'*H*)-amine (3ca)<sup>[2]</sup>**

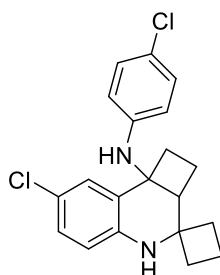

**3ca**, 80%

The general procedure was applied to 4-chloroaniline (0.2 mmol), cyclobutanone oxime (0.4 mmol), Cu(CF<sub>3</sub>COO)<sub>2</sub> (11.58 mg, 0.04 mmol), *n*-hexane (2 mL) at 80 °C for 12 h. The crude product was purified by column chromatography on neutral alumina (EtOAc/PE 1:60) to afford the title compound as a yellow solid (29 mg, 80% yield). <sup>1</sup>H NMR (400 MHz, CDCl<sub>3</sub>) δ = 7.24 (d, *J* = 2.5 Hz, 1H), 7.00 (dd, *J* = 8.7, 2.1 Hz, 3H), 6.57 (d, *J* = 8.5 Hz, 1H), 6.40 – 6.33 (m, 2H), 4.21 (s, 1H), 4.01 (s, 1H), 2.86 (t, *J* = 8.5 Hz, 1H), 2.28 – 2.15 (m, 2H), 2.00 (ddt, *J* = 14.2, 11.5, 4.4 Hz, 2H), 1.95 – 1.81 (m, 3H), 1.78 – 1.70 (m, 1H), 1.60 (dtd, *J* = 14.2, 6.1, 5.5, 3.0 Hz, 2H). <sup>13</sup>C NMR (101 MHz, CDCl<sub>3</sub>) δ = 143.93, 141.65, 128.70, 128.52, 127.55, 126.46, 123.45, 122.55, 116.63, 116.43, 56.41, 54.83, 50.59, 37.98, 37.73, 33.73, 15.53, 12.60.



**7'-Chloro-*N*-(4-chlorophenyl)-2',2a'-dihydro-1'*H*-spiro[cyclobutane-1,3'-cyclobuta[*c*]quinolin]-8b'(4'*H*)-amine (3da)<sup>[2]</sup>**

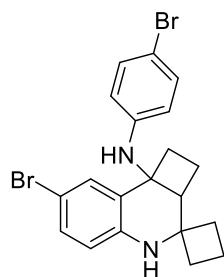

**3da**, 57%

The general procedure was applied to 4-bromoaniline (0.2 mmol), cyclobutanone oxime (0.4 mmol), Cu(CF<sub>3</sub>COO)<sub>2</sub> (11.58 mg, 0.04 mmol), *n*-hexane (2 mL) at 80 °C for 12 h. The crude product was purified by column chromatography on neutral alumina (EtOAc/PE 1:60) to afford the title compound as a yellow solid (26 mg, 57% yield). <sup>1</sup>H NMR (400 MHz, CDCl<sub>3</sub>) δ = 7.36 (d, *J* = 2.3 Hz, 1H), 7.12 (dd, *J* = 8.7, 3.4 Hz, 3H), 6.52 (d, *J* = 8.5 Hz, 1H), 6.34 – 6.28 (m, 2H), 4.22 (s, 1H), 4.02 (s, 1H), 2.86 (t, *J* = 8.5 Hz, 1H), 2.28 – 2.15 (m, 2H), 2.04 – 1.95 (m, 2H), 1.94 – 1.81 (m, 3H), 1.78 – 1.69 (m, 1H), 1.63 – 1.55 (m, 2H). <sup>13</sup>C NMR (101 MHz, CDCl<sub>3</sub>) δ = 144.31, 142.07, 131.57, 130.39, 129.33, 128.90, 117.04, 116.86, 110.62, 109.69, 56.30, 54.76, 50.61, 38.03, 37.74, 33.74, 15.54, 12.59.

**7'-Iodo-N-(4-iodophenyl)-2',2a'-dihydro-1'*H*-spiro[cyclobutane-1,3'-cyclobuta[*c*]quinolin]-8b'(4'*H*)-amine (3ea)<sup>[2]</sup>**

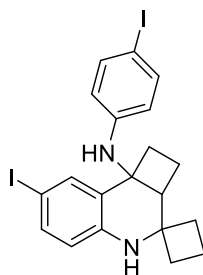

**3ea**, 59%

The general procedure was applied to 4-iodoaniline (0.2 mmol), cyclobutanone oxime (0.4 mmol), Cu(CF<sub>3</sub>COO)<sub>2</sub> (11.58 mg, 0.04 mmol), *n*-hexane (2 mL) at 80 °C for 12 h. The crude product was purified by column chromatography on neutral alumina (EtOAc/PE 1:60) to afford the title compound as a yellow solid (32 mg, 59% yield). <sup>1</sup>H NMR (600 MHz, DMSO) δ = 7.25 (d, *J* = 8.2 Hz, 2H), 6.60 (d, *J* = 8.4 Hz, 1H), 6.51 (s, 1H), 6.35 (s, 1H), 6.24 (d, *J* = 8.3 Hz, 2H), 2.73 (t, *J* = 8.2 Hz, 1H), 2.47 (d, *J* = 9.4 Hz, 1H), 2.05 (q, *J* = 9.9 Hz, 1H), 1.92 (dt, *J* = 19.7, 8.9 Hz, 4H), 1.83 (t, *J* = 10.3 Hz, 1H), 1.71 (q, *J* = 10.2 Hz, 1H), 1.54 (q, *J* = 9.4 Hz, 1H), 1.44 (q, *J* = 8.8, 8.4 Hz, 1H). <sup>13</sup>C NMR (151 MHz, DMSO) δ 145.67, 143.69, 136.54, 135.20, 133.96, 128.71, 117.51, 116.86, 78.01, 76.98, 54.74, 53.83, 50.83, 37.96, 36.14, 32.68, 15.45, 12.03.

**7'-(Trifluoromethoxy)-*N*-(4-(trifluoromethoxy)phenyl)-2',2a'-  
dihydro-1'*H*-spiro[cyclobutane-1,3'-cyclobuta[*c*]quinolin]-8b'(4'*H*)-  
amine (3fa)**

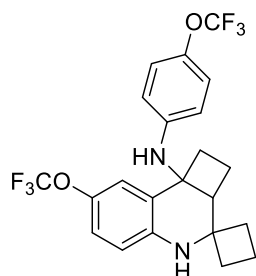

**3fa**, 33%

The general procedure was applied to 4-(trifluoromethoxy)aniline (0.2 mmol), cyclobutanone oxime (0.4 mmol), Cu(CF<sub>3</sub>COO)<sub>2</sub> (11.58 mg, 0.04 mmol), *n*-hexane (2 mL) at 80 °C for 12 h. The crude product was purified by column chromatography on neutral alumina (EtOAc/PE 1:20) to afford the title compound as a colorless liquid (15 mg, 33% yield). <sup>1</sup>H NMR (400 MHz, CDCl<sub>3</sub>) δ = 7.13 (dd, *J* = 2.8, 1.0 Hz, 1H), 6.95 – 6.85 (m, 3H), 6.61 (d, *J* = 8.6 Hz, 1H), 6.39 – 6.34 (m, 2H), 4.11 (s, 2H), 2.92 – 2.85 (m, 1H), 2.31 – 2.17 (m, 2H), 2.06 – 1.96 (m, 2H), 1.96 – 1.82 (m, 3H), 1.79 – 1.70 (m, 1H), 1.67 – 1.57 (m, 2H). <sup>13</sup>C NMR (101 MHz, CDCl<sub>3</sub>) δ = 144.02, 141.85, 141.38, 140.93, 127.83, 121.85, 120.79, 119.83, 115.94, 115.71, 56.52, 54.86, 50.60, 37.85, 37.71, 33.69, 15.46, 12.59.

**Methyl 8b'-((4-(methoxycarbonyl)phenyl)amino)-2',2a',4',8b'-tetrahydro-1'*H*-spiro[cyclobutane-1,3'-cyclobuta[*c*]quinoline]-7'-carboxylate (3ga)<sup>[2]</sup>**

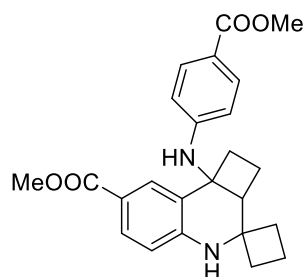

**3ga**, 40%

The general procedure was applied to methyl 4-aminobenzoate (0.2 mmol), cyclobutanone oxime (0.4 mmol), Cu(CF<sub>3</sub>COO)<sub>2</sub> (11.58 mg, 0.04 mmol), *n*-hexane (2 mL) at 80 °C for 12 h. The crude product was purified by column chromatography on neutral alumina (EtOAc/PE 1:10) to afford the title compound as a white solid (16 mg, 40% yield). <sup>1</sup>H NMR (400 MHz, DMSO) δ = 7.63 (d, *J* = 2.1 Hz, 1H), 7.50 (dd, *J* = 14.9, 8.6 Hz, 3H), 7.20 (s, 1H), 7.09 (s, 1H), 6.69 (d, *J* = 8.6 Hz, 1H), 6.31 (d, *J* = 8.4 Hz, 2H), 3.64 (d, *J* = 7.1 Hz, 6H), 2.79 (t, *J* = 8.9 Hz, 1H), 2.55 (q, *J* = 10.6, 10.2 Hz, 1H), 2.12 – 1.96 (m, 2H), 1.94 – 1.80 (m, 4H), 1.62 (d, *J* = 7.4 Hz, 1H), 1.51 (q, *J* = 9.5 Hz, 1H), 1.31 (p, *J* = 10.0 Hz, 1H). <sup>13</sup>C NMR (101 MHz, DMSO) δ = 166.66, 166.64, 150.54, 148.54, 131.50, 130.60, 129.32, 123.69, 117.55, 116.56, 114.24, 113.52, 54.81, 53.92, 51.61, 51.29, 39.05, 36.68, 33.44, 15.90, 12.29.

**1-(4-((7'-Acetyl-2',2a'-dihydro-1'*H*-spiro[cyclobutane-1,3'-cyclobuta[*c*]quinoline]-8b'(4'*H*)-yl)amino)phenyl)ethan-1-one (3ha)**

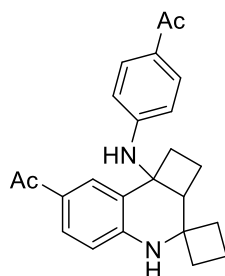

**3ha**, 29%

The general procedure was applied to 1-(4-aminophenyl)ethan-1-one (0.2 mmol), cyclobutanone oxime (0.4 mmol), Cu(CF<sub>3</sub>COO)<sub>2</sub> (11.58 mg, 0.04 mmol), *n*-hexane (2 mL) at 80 °C for 12 h. The crude product was purified by column chromatography on neutral alumina (EtOAc/PE 1:10) to afford the title compound as a white solid (11 mg, 29% yield). <sup>1</sup>H NMR (400 MHz, DMSO) δ = 7.63 (d, *J* = 2.1 Hz, 1H), 7.57 (dd, *J* = 8.6, 2.1 Hz, 1H), 7.53 (s, 1H), 7.51 (s, 1H), 7.25 (s, 1H), 7.17 (s, 1H), 6.69 (d, *J* = 8.5 Hz, 1H), 6.32 (d, *J* = 8.5 Hz, 2H), 2.81 (t, *J* = 8.9 Hz, 1H), 2.57 (q, *J* = 10.2 Hz, 1H), 2.29 (d, *J* = 5.2 Hz, 6H), 2.10 – 1.81 (m, 6H), 1.69 – 1.59 (m, 1H), 1.58 – 1.49 (m, 1H), 1.37 – 1.25 (m, 1H). <sup>13</sup>C NMR (101 MHz, DMSO) δ = 195.53, 195.41, 150.61, 148.67, 130.06, 129.32, 128.30, 126.50, 125.47, 123.64, 113.84, 113.34, 54.86, 53.97, 51.22, 39.07, 36.64, 33.44, 26.24, 15.96, 12.32.

**7'-Methyl-*N*-(*p*-tolyl)-2',2*a*'-dihydro-1'*H*-spiro[cyclobutane-1,3'-cyclobuta[*c*]quinolin]-8*b*'(4'*H*)-amine (3ia)<sup>[2]</sup>**

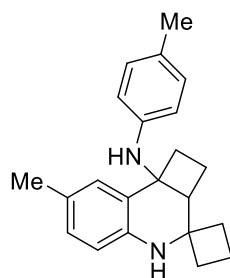

**3ia**, 96%

The general procedure was applied to *p*-toluidine (0.2 mmol), cyclobutanone oxime (0.4 mmol), Cu(CF<sub>3</sub>COO)<sub>2</sub> (11.58 mg, 0.04 mmol), *n*-hexane (2 mL) at 80 °C for 12 h. The crude product was purified by column chromatography on neutral alumina (EtOAc/PE 1:60) to afford the title compound as a red liquid (31 mg, 96% yield). <sup>1</sup>H NMR (400 MHz, cdcl<sub>3</sub>) δ = 7.20 (d, *J* = 2.0 Hz, 1H), 6.94 – 6.86 (m, 3H), 6.58 (d, *J* = 8.0 Hz, 1H), 6.47 (d, *J* = 8.4 Hz, 2H), 3.95 (s, 2H), 2.97 (t, *J* = 8.4 Hz, 1H), 2.38 – 2.30 (m, 1H), 2.22 (d, *J* = 4.4 Hz, 6H), 2.17 (dd, *J* = 11.2, 4.8 Hz, 1H), 2.06 – 1.89 (m, 4H), 1.84 (t, *J* = 8.9 Hz, 1H), 1.72 (tt, *J* = 9.5, 4.7 Hz, 1H), 1.69 – 1.58 (m, 2H). <sup>13</sup>C NMR (101 MHz, CDCl<sub>3</sub>) δ = 143.54, 140.58, 129.38, 128.16, 128.07, 127.16, 126.97, 116.02, 115.45, 56.95, 54.89, 49.89, 37.53, 37.44, 33.76, 20.75, 20.42, 15.49, 12.73.

**7'-Methoxy-*N*-(4-methoxyphenyl)-2',2a'-dihydro-1'*H*-  
spiro[cyclobutane-1,3'-cyclobuta[*c*]quinolin]-8b'(4'*H*)-amine (3ja)<sup>[2]</sup>**

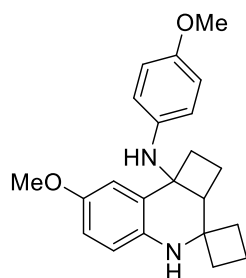

**3ja**, 97%

The general procedure was applied to 4-methoxyaniline (0.2 mmol), cyclobutanone oxime (0.4 mmol), Cu(CF<sub>3</sub>COO)<sub>2</sub> (11.58 mg, 0.04 mmol), *n*-hexane (2 mL) at 80 °C for 12 h. The crude product was purified by column chromatography on neutral alumina (EtOAc/PE 1:10) to afford the title compound as a white solid (34 mg, 97% yield). <sup>1</sup>H NMR (400 MHz, CDCl<sub>3</sub>) δ = 7.01 (d, *J* = 2.8 Hz, 1H), 6.70 – 6.65 (m, 3H), 6.59 (d, *J* = 8.4 Hz, 1H), 6.49 (d, *J* = 8.8 Hz, 2H), 3.70 (d, *J* = 6.2 Hz, 6H), 2.87 (t, *J* = 8.4 Hz, 1H), 2.25 (t, *J* = 9.9 Hz, 1H), 2.19 (dd, *J* = 10.0, 4.8 Hz, 1H), 1.99 (dd, *J* = 11.7, 4.1 Hz, 1H), 1.92 (ddd, *J* = 17.3, 8.3, 4.9 Hz, 2H), 1.71 (ddd, *J* = 15.2, 11.4, 7.8 Hz, 3H), 1.64 – 1.50 (m, 2H). <sup>13</sup>C NMR (101 MHz, CDCl<sub>3</sub>) δ = 153.89, 152.72, 139.75, 137.05, 129.14, 118.04, 116.48, 114.35, 114.06, 111.52, 57.76, 55.61, 55.55, 54.98, 49.63, 37.48, 37.20, 33.60, 15.35, 12.72.

**6'-Fluoro-*N*-(3-fluorophenyl)-2',2a'-dihydro-1'*H*-spiro[cyclobutane-1,3'-cyclobuta[*c*]quinolin]-8b'(4'*H*)-amine (3ka)<sup>[2]</sup>**

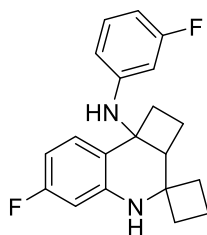

**3ka**, 31%

The general procedure was applied to 3-fluoroaniline (0.2 mmol), cyclobutanone oxime (0.4 mmol), Cu(CF<sub>3</sub>COO)<sub>2</sub> (11.58 mg, 0.04 mmol), *n*-hexane (2 mL) at 80 °C for 12 h. The crude product was purified by column chromatography on neutral alumina (EtOAc/PE 1:60) to afford the title compound as a white solid (10 mg, 31% yield). <sup>1</sup>H NMR (600 MHz, CDCl<sub>3</sub>) δ = 7.19 (dd, *J* = 8.6, 6.4 Hz, 1H), 6.97 (td, *J* = 8.2, 6.8 Hz, 1H), 6.39 (td, *J* = 8.5, 2.5 Hz, 1H), 6.35 – 6.29 (m, 2H), 6.22 (ddd, *J* = 8.2, 2.3, 0.9 Hz, 1H), 6.08 (dt, *J* = 12.0, 2.4 Hz, 1H), 4.33 (s, 1H), 4.08 (s, 1H), 2.93 (t, *J* = 8.7 Hz, 1H), 2.33 – 2.25 (m, 1H), 2.19 – 2.12 (m, 1H), 2.04 (ddt, *J* = 13.0, 8.7, 4.0 Hz, 1H), 1.98 – 1.88 (m, 4H), 1.73 (dtd, *J* = 11.8, 9.6, 4.8 Hz, 1H), 1.63 – 1.57 (m, 2H). <sup>13</sup>C NMR (151 MHz, CDCl<sub>3</sub>) δ = 163.32, 161.71, 147.31, 144.42, 129.77, 128.61, 122.03, 111.02, 105.88, 103.97, 101.59, 101.43, 56.05, 54.75, 50.82, 38.16, 37.84, 33.91, 15.38, 12.58.



**6'-Chloro-*N*-(3-chlorophenyl)-2',2a'-dihydro-1'*H*-spiro[cyclobutane-1,3'-cyclobuta[*c*]quinolin]-8b'(4'*H*)-amine (3la)<sup>[2]</sup>**

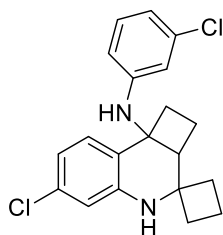

**3la**, 63%

The general procedure was applied to 3-chloroaniline (0.2 mmol), cyclobutanone oxime (0.4 mmol), Cu(CF<sub>3</sub>COO)<sub>2</sub> (11.58 mg, 0.04 mmol), *n*-hexane (2 mL) at 80 °C for 12 h. The crude product was purified by column chromatography on neutral alumina (EtOAc/PE 1:60) to afford the title compound as a white solid (23 mg, 63% yield). <sup>1</sup>H NMR (400 MHz, CDCl<sub>3</sub>) δ = 7.19 – 7.13 (m, 1H), 6.94 (t, *J* = 8.1 Hz, 1H), 6.67 – 6.59 (m, 3H), 6.40 (t, *J* = 2.2 Hz, 1H), 6.28 (ddd, *J* = 8.2, 2.3, 0.9 Hz, 1H), 4.30 (s, 1H), 4.07 (s, 1H), 2.89 (t, *J* = 8.5 Hz, 1H), 2.30 – 2.21 (m, 1H), 2.16 (ddd, *J* = 11.5, 10.1, 4.5 Hz, 1H), 2.07 – 1.89 (m, 5H), 1.76 (ddt, *J* = 16.2, 9.8, 4.6 Hz, 1H), 1.67 – 1.58 (m, 2H). <sup>13</sup>C NMR (101 MHz, CDCl<sub>3</sub>) δ = 146.53, 144.14, 134.43, 132.92, 129.78, 128.11, 125.05, 118.92, 117.53, 114.88, 114.84, 113.18, 55.94, 54.90, 50.92, 38.07, 37.70, 33.80, 15.52, 12.62.

**6'-Bromo-*N*-(3-bromophenyl)-2',2a'-dihydro-1'*H*-spiro[cyclobutane-1,3'-cyclobuta[*c*]quinolin]-8b'(4'*H*)-amine (3ma)<sup>[2]</sup>**

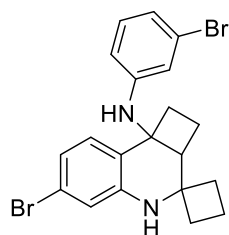

**3ma**, 91%

The general procedure was applied to 3-bromoaniline (0.2 mmol), cyclobutanone oxime (0.4 mmol), Cu(CF<sub>3</sub>COO)<sub>2</sub> (11.58 mg, 0.04 mmol), *n*-hexane (2 mL) at 80 °C for 12 h. The crude product was purified by column chromatography on neutral alumina (EtOAc/PE 1:60) to afford the title compound as a white solid (41 mg, 91% yield). <sup>1</sup>H NMR (400 MHz, CDCl<sub>3</sub>) δ 7.08 (d, *J* = 8.7 Hz, 1H), 6.87 (t, *J* = 8.0 Hz, 1H), 6.81 – 6.75 (m, 3H), 6.56 (t, *J* = 2.1 Hz, 1H), 6. (dd, *J* = 7.7, 1.8 Hz, 1H), 4.28 (s, 1H), 4.06 (s, 1H), 2.88 (t, *J* = 8.530 Hz, 1H), 2.29 – 2.14 (m, 2H), 2.06 – 1.89 (m, 5H), 1.77 (ddt, *J* = 11.6, 9.2, 4.7 Hz, 1H), 1.61 (dtd, *J* = 11.8, 8.4, 2.9 Hz, 2H). <sup>13</sup>C NMR (101 MHz, CDCl<sub>3</sub>) δ = 146.63, 144.42, 132.23, 130.08, 128.34, 125.52, 122.70, 121.79, 121.05, 120.43, 117.78, 115.72, 113.49, 55.96, 54.92, 50.93, 38.07, 37.64, 33.78, 15.55, 12.63.

**6'-Iodo-*N*-(3-iodophenyl)-2',2*a*'-dihydro-1'*H*-spiro[cyclobutane-1,3'-cyclobuta[*c*]quinolin]-8*b*'(4'*H*)-amine (3na)<sup>[2]</sup>**

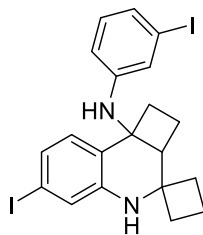

**3na**, 66%

The general procedure was applied to 3-iodoaniline (0.2 mmol), cyclobutanone oxime (0.4 mmol), Cu(CF<sub>3</sub>COO)<sub>2</sub> (11.58 mg, 0.04 mmol), *n*-hexane (2 mL) at 80 °C for 12 h. The crude product was purified by column chromatography on neutral alumina (EtOAc/PE 1:60) to afford the title compound as a white solid (36 mg, 66% yield). <sup>1</sup>H NMR (400 MHz, CDCl<sub>3</sub>) δ = 7.03 – 6.91 (m, 4H), 6.78 (s, 1H), 6.73 (t, *J* = 8.0 Hz, 1H), 6.33 (dd, *J* = 8.2, 2.3 Hz, 1H), 4.24 (s, 1H), 4.13 (q, *J* = 7.1 Hz, 1H), 4.05 (s, 1H), 2.87 (t, *J* = 8.5 Hz, 1H), 2.28 – 2.11 (m, 2H), 2.05 (s, 1H), 2.03 – 1.99 (m, 1H), 1.98 – 1.94 (m, 1H), 1.89 (dd, *J* = 10.3, 2.4 Hz, 1H), 1.76 (ddt, *J* = 18.2, 9.2, 4.5 Hz, 1H), 1.61 (dt, *J* = 10.4, 8.4 Hz, 2H), 1.26 (t, *J* = 7.1 Hz, 1H). <sup>13</sup>C NMR (101 MHz, CDCl<sub>3</sub>) δ = 146.55, 144.56, 130.26, 128.49, 127.78, 126.49, 126.28, 123.77, 123.73, 114.03, 94.73, 92.81, 55.96, 54.88, 50.98, 38.09, 37.62, 33.79, 15.59, 12.66.

**6'-(Trifluoromethyl)-*N*-(3-(trifluoromethyl)phenyl)-2',2a'-dihydro-1'*H*-spiro[cyclobutane-1,3'-cyclobuta[*c*]quinolin]-8b'(4'*H*)-amine (3oa)<sup>[2]</sup>**

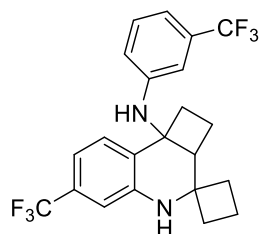

**3oa**, 58%

The general procedure was applied to 3-(trifluoromethyl)aniline (0.2 mmol), cyclobutanone oxime (0.4 mmol), Cu(CF<sub>3</sub>COO)<sub>2</sub> (11.58 mg, 0.04 mmol), *n*-hexane (2 mL) at 80 °C for 12 h. The crude product was purified by column chromatography on neutral alumina (EtOAc/PE 1:60) to afford the title compound as a colorless solid (25 mg, 58% yield). <sup>1</sup>H NMR (400 MHz, CDCl<sub>3</sub>) δ = 7.34 (d, *J* = 8.1 Hz, 1H), 7.12 (t, *J* = 8.0 Hz, 1H), 6.95 – 6.87 (m, 3H), 6.64 (s, 1H), 6.52 (dd, *J* = 8.2, 2.4 Hz, 1H), 4.51 (s, 1H), 4.25 (s, 1H), 2.94 (t, *J* = 8.6 Hz, 1H), 2.34 – 2.22 (m, 2H), 2.13 – 2.02 (m, 2H), 2.00 – 1.91 (m, 3H), 1.78 (tdd, *J* = 14.3, 10.2, 5.0 Hz, 1H), 1.64 (dtd, *J* = 17.5, 8.9, 3.1 Hz, 2H). <sup>13</sup>C NMR (101 MHz, cdcl<sub>3</sub>) δ 145.40, 143.31, 130.93, 129.72, 129.56, 129.23, 127.35, 125.56, 122.85, 117.66, 115.14, 114.06, 111.88, 111.37, 55.97, 54.76, 51.34, 38.18, 37.70, 33.85, 15.57, 12.53.

**6'-Methoxy-*N*-(3-methoxyphenyl)-2',2a'-dihydro-1'*H*-  
spiro[cyclobutane-1,3'-cyclobuta[*c*]quinolin]-8b'(4'*H*)-amine (3pa)**

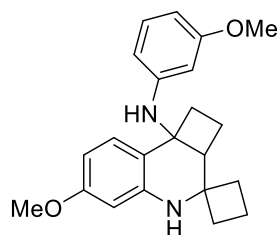

**3pa**, 70%

The general procedure was applied to 3-methoxyaniline (0.2 mmol), cyclobutanone oxime (0.4 mmol), Cu(CF<sub>3</sub>COO)<sub>2</sub> (11.58 mg, 0.04 mmol), *n*-hexane (2 mL) at 80 °C for 12 h. The crude product was purified by column chromatography on neutral alumina (EtOAc/PE 1:10) to afford the title compound as a colorless liquid (25 mg, 70% yield). <sup>1</sup>H NMR (400 MHz, CDCl<sub>3</sub>) δ = 7.07 (ddd, *J* = 8.2, 3.9, 1.7 Hz, 1H), 6.82 (dq, *J* = 10.0, 3.9, 3.0 Hz, 1H), 6.17 (ddd, *J* = 6.1, 3.8, 1.8 Hz, 1H), 6.11 – 6.06 (m, 1H), 6.05 – 6.01 (m, 1H), 6.01 – 5.95 (m, 1H), 5.90 (dd, *J* = 4.0, 2.1 Hz, 1H), 3.96 (d, *J* = 84.4 Hz, 2H), 3.61 (dd, *J* = 4.0, 1.8 Hz, 3H), 3.52 – 3.45 (m, 3H), 2.85 (s, 1H), 2.20 (td, *J* = 10.5, 9.9, 3.7 Hz, 1H), 2.08 – 1.97 (m, 1H), 1.93 – 1.69 (m, 5H), 1.62 – 1.53 (m, 1H), 1.51 – 1.42 (m, 2H). <sup>13</sup>C NMR (101 MHz, CDCl<sub>3</sub>) δ = 160.24, 159.22, 147.28, 143.95, 129.45, 128.41, 119.75, 108.43, 105.05, 103.04, 101.10, 100.03, 56.24, 55.09, 54.88, 54.67, 50.52, 38.15, 37.72, 33.98, 15.31, 12.64.

The chemical structure shows a benzocyclobuta[1,2-b]pyridine core. The pyridine ring is partially hydrogenated, with NH groups at positions 1 and 5. A methyl group is attached to the nitrogen at position 1. A 4-methylphenyl group is attached to the carbon at position 4. The benzene ring fused to the pyridine has a methyl group at the 6-position.

S21

**6'-Ethyl-*N*-(3-ethylphenyl)-2',2a'-dihydro-1'*H*-spiro[cyclobutane-1,3'-cyclobuta[*c*]quinolin]-8b'(4'*H*)-amine (3ra)**

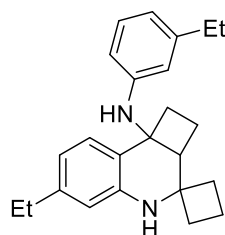

**3ra**, 29%

The general procedure was applied to 3-ethylaniline (0.2 mmol), cyclobutanone oxime (0.4 mmol), Cu(CF<sub>3</sub>COO)<sub>2</sub> (11.58 mg, 0.04 mmol), *n*-hexane (2 mL) at 80 °C for 12 h. The crude product was purified by column chromatography on neutral alumina (EtOAc/PE 1:60) to afford the title compound as a yellow liquid (10 mg, 29% yield). <sup>1</sup>H NMR (400 MHz, CDCl<sub>3</sub>) δ = 7.28 (d, *J* = 7.9 Hz, 1H), 7.05 – 6.99 (m, 1H), 6.61 (dd, *J* = 7.9, 1.7 Hz, 1H), 6.55 (d, *J* = 7.8 Hz, 1H), 6.51 (d, *J* = 1.7 Hz, 1H), 6.37 (dd, *J* = 7.8, 1.5 Hz, 2H), 4.07 (d, *J* = 88.6 Hz, 2H), 3.05 (t, *J* = 8.6 Hz, 1H), 2.60 (q, *J* = 7.6 Hz, 2H), 2.52 (q, *J* = 7.6 Hz, 2H), 2.42 (dd, *J* = 20.0, 9.9 Hz, 1H), 2.26 – 2.18 (m, 1H), 2.07 – 1.96 (m, 3H), 1.92 – 1.85 (m, 1H), 1.75 – 1.58 (m, 3H), 1.32 (s, 1H), 1.26 (t, *J* = 7.6 Hz, 3H), 1.16 (t, *J* = 7.6 Hz, 3H). <sup>13</sup>C NMR (101 MHz, CDCl<sub>3</sub>) δ = 145.97, 144.77, 143.50, 142.82, 128.67, 127.14, 124.99, 118.82, 117.27, 115.24, 114.52, 112.83, 56.48, 54.66, 50.38, 37.93, 37.42, 34.00, 28.93, 28.58, 15.39, 15.37, 15.27, 12.71.

**5'-Methoxy-*N*-(2-methoxyphenyl)-2',2a'-dihydro-1'*H*-  
spiro[cyclobutane-1,3'-cyclobuta[*c*]quinolin]-8b'(4'*H*)-amine (3sa)**

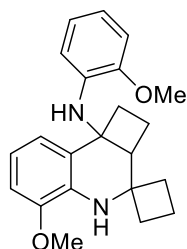

**3sa**, 20%

The general procedure was applied to 2-methoxyaniline (0.2 mmol), cyclobutanone oxime (0.4 mmol), Cu(CF<sub>3</sub>COO)<sub>2</sub> (11.58 mg, 0.04 mmol), *n*-hexane (2 mL) at 80 °C for 12 h. The crude product was purified by column chromatography on neutral alumina (EtOAc/PE 1:40) to afford the title compound as a colorless liquid (7 mg, 20% yield). <sup>1</sup>H NMR (400 MHz, CDCl<sub>3</sub>) δ = 6.99 (dd, *J* = 7.4, 1.8 Hz, 1H), 6.82 – 6.75 (m, 1H), 6.72 – 6.57 (m, 4H), 6.33 – 6.25 (m, 1H), 4.91 (s, 1H), 4.74 – 4.60 (m, 1H), 3.90 (d, *J* = 7.0 Hz, 6H), 2.97 (t, *J* = 8.6 Hz, 1H), 2.45 (ddd, *J* = 11.3, 10.0, 8.7 Hz, 1H), 2.22 (ddd, *J* = 11.4, 9.7, 4.1 Hz, 1H), 2.11 – 1.94 (m, 4H), 1.84 (q, *J* = 10.9, 10.0 Hz, 1H), 1.75 – 1.58 (m, 3H). <sup>13</sup>C NMR (101 MHz, CDCl<sub>3</sub>) δ = 147.33, 146.61, 135.53, 132.90, 127.51, 120.60, 118.98, 117.32, 116.34, 113.26, 109.31, 107.56, 56.00, 55.53, 55.47, 54.11, 51.07, 38.59, 37.59, 33.82, 15.43, 12.64.



***N*-(3,4-Dimethylphenyl)-6',7'-dimethyl-2',2a'-dihydro-1'*H*-  
spiro[cyclobutane-1,3'-cyclobuta[*c*]quinolin]-8b'(4'*H*)-amine (3ta)<sup>[2]</sup>**

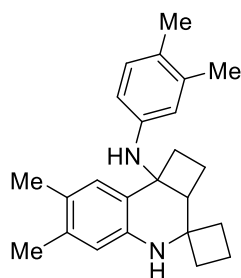

**3ta**, 60%

The general procedure was applied to 3,4-dimethylaniline (0.2 mmol), cyclobutanone oxime (0.4 mmol), Cu(CF<sub>3</sub>COO)<sub>2</sub> (11.58 mg, 0.04 mmol), *n*-hexane (2 mL) at 80 °C for 12 h. The crude product was purified by column chromatography on neutral alumina (EtOAc/PE 1:60) to afford the title compound as a yellow liquid (22 mg, 60% yield). <sup>1</sup>H NMR (400 MHz, CDCl<sub>3</sub>) δ = 7.13 (s, 1H), 6.84 (d, *J* = 8.1 Hz, 1H), 6.47 (s, 1H), 6.43 (d, *J* = 2.5 Hz, 1H), 6.30 (dd, *J* = 8.1, 2.5 Hz, 1H), 3.88 (s, 2H), 2.98 (t, *J* = 8.5 Hz, 1H), 2.41 – 2.33 (m, 1H), 2.20 (s, 3H), 2.15 (s, 3H), 2.13 (s, 3H), 2.12 (s, 3H), 2.01 (ddd, *J* = 8.8, 6.4, 3.9 Hz, 2H), 1.95 – 1.88 (m, 2H), 1.87 – 1.80 (m, 1H), 1.78 – 1.64 (m, 2H), 1.64 – 1.56 (m, 2H). <sup>13</sup>C NMR (101 MHz, CDCl<sub>3</sub>) δ = 143.99, 140.73, 136.82, 135.60, 129.87, 127.72, 126.95, 125.85, 125.68, 117.86, 116.66, 113.18, 56.71, 54.80, 49.58, 37.48, 37.24, 33.81, 20.01, 19.62, 19.02, 18.70, 15.36, 12.76.

***N*-(3,4-Difluorophenyl)-6',7'-difluoro-2',2a'-dihydro-1'*H*-  
spiro[cyclobutane-1,3'-cyclobuta[*c*]quinolin]-8b'(4'*H*)-amine (3ua)**

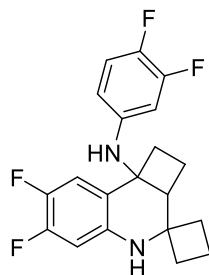

**3ua**, 69%

The general procedure was applied to 3,4-difluoroaniline (0.2 mmol), cyclobutanone oxime (0.4 mmol), Cu(CF<sub>3</sub>COO)<sub>2</sub> (11.58 mg, 0.04 mmol), *n*-hexane (2 mL) at 80 °C for 12 h. The crude product was purified by column chromatography on neutral alumina (EtOAc/PE 1:60) to afford the title compound as a yellow solid (25 mg, 69% yield). <sup>1</sup>H NMR (400 MHz, CDCl<sub>3</sub>) δ = 7.06 (dd, *J* = 11.3, 8.8 Hz, 1H), 6.90 – 6.78 (m, 1H), 6.43 (dd, *J* = 11.6, 6.8 Hz, 1H), 6.22 – 6.08 (m, 2H), 4.13 (s, 1H), 3.95 (s, 1H), 2.82 (t, *J* = 8.5 Hz, 1H), 2.22 – 2.11 (m, 2H), 2.07 – 1.91 (m, 3H), 1.88 – 1.82 (m, 2H), 1.79 – 1.72 (m, 1H), 1.64 – 1.57 (m, 2H). <sup>13</sup>C NMR (101 MHz, CDCl<sub>3</sub>) δ = 151.57, 151.44, 150.96, 150.82, 149.14, 149.01, 148.52, 148.38, 145.33, 145.20, 144.65, 144.52, 142.96, 142.83, 142.29, 142.26, 142.24, 142.18, 142.16, 139.71, 139.69, 139.63, 139.61, 122.14, 122.10, 122.07, 117.19, 117.17, 117.01, 116.99, 115.09, 115.07, 114.91, 114.89, 110.81, 110.78, 110.76, 110.73, 104.13, 103.92, 103.68, 103.48, 56.35, 54.94, 50.58, 37.87, 33.64, 29.69, 15.31, 12.52.

**6'-Chloro-*N*-(3-chloro-4-methoxyphenyl)-7'-methoxy-2',2a'-dihydro-1'*H*-spiro[cyclobutane-1,3'-cyclobuta[*c*]quinolin]-8b'(4'*H*)-amine (3va)**

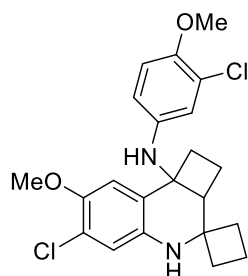

**3va**, 31%

The general procedure was applied to 3-chloro-4-methoxyaniline (0.2 mmol), cyclobutanone oxime (0.4 mmol), Cu(CF<sub>3</sub>COO)<sub>2</sub> (11.58 mg, 0.04 mmol), *n*-hexane (2 mL) at 80 °C for 12 h. The crude product was purified by column chromatography on neutral alumina (EtOAc/PE 1:60) to afford the title compound as a yellow liquid (13 mg, 31% yield). <sup>1</sup>H NMR (600 MHz, CDCl<sub>3</sub>) δ = 6.88 (s, 1H), 6.64 (s, 1H), 6.59 (d, *J* = 8.8 Hz, 1H), 6.50 (d, *J* = 2.8 Hz, 1H), 6.23 (dd, *J* = 8.8, 2.8 Hz, 1H), 3.71 (s, 3H), 3.66 (s, 3H), 2.78 – 2.68 (m, 1H), 2.15 – 2.07 (m, 2H), 1.94 – 1.85 (m, 2H), 1.81 (dt, *J* = 12.0, 8.8 Hz, 1H), 1.73 – 1.69 (m, 2H), 1.59 – 1.46 (m, 3H). <sup>13</sup>C NMR (151 MHz, CDCl<sub>3</sub>) δ = 148.40, 147.99, 140.15, 137.60, 126.92, 118.45, 117.10, 115.18, 113.35, 111.09, 57.25, 56.82, 56.71, 55.04, 50.36, 37.82, 37.47, 33.51, 15.35, 12.69.

**6'-Chloro-*N*-(3-chloro-4-ethylphenyl)-7'-ethyl-2',2a'-dihydro-1'*H*-spiro[cyclobutane-1,3'-cyclobuta[*c*]quinolin]-8b'(4'*H*)-amine (3wa)<sup>[2]</sup>**

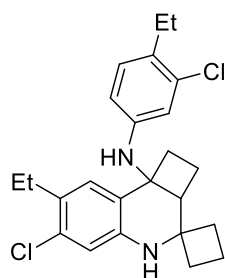

**3wa**, 32%

The general procedure was applied to 3-chloro-4-ethylaniline (0.2 mmol), cyclobutanone oxime (0.4 mmol), Cu(CF<sub>3</sub>COO)<sub>2</sub> (11.58 mg, 0.04 mmol), *n*-hexane (2 mL) at 80 °C for 12 h. The crude product was purified by column chromatography on neutral alumina (EtOAc/PE 1:60) to afford the title compound as a red liquid (13 mg, 32% yield). <sup>1</sup>H NMR (400 MHz, CDCl<sub>3</sub>) δ = 7.13 (s, 1H), 6.90 (d, *J* = 8.3 Hz, 1H), 6.67 (s, 1H), 6.49 (d, *J* = 2.5 Hz, 1H), 6.31 (dd, *J* = 8.3, 2.4 Hz, 1H), 4.02 (d, *J* = 70.7 Hz, 2H), 2.90 (t, *J* = 8.5 Hz, 1H), 2.59 (p, *J* = 7.3 Hz, 4H), 2.28 (q, *J* = 10.0 Hz, 1H), 2.16 (td, *J* = 11.1, 10.6, 4.5 Hz, 1H), 2.04 – 1.85 (m, 5H), 1.74 (ddd, *J* = 14.1, 9.2, 4.7 Hz, 1H), 1.67 – 1.57 (m, 2H), 1.13 (dt, *J* = 19.2, 7.5 Hz, 6H). <sup>13</sup>C NMR (101 MHz, CDCl<sub>3</sub>) δ = 144.60, 141.99, 133.72, 132.30, 131.77, 130.53, 129.48, 127.65, 126.19, 116.09, 115.60, 114.26, 56.45, 54.95, 50.46, 37.71, 37.59, 33.69, 26.04, 25.73, 15.44, 14.65, 14.38, 12.68.

**6'-Chloro-*N*-(3-chloro-4-methylphenyl)-7'-methyl-2',2a'-dihydro-1'*H*-spiro[cyclobutane-1,3'-cyclobuta[*c*]quinolin]-8b'(4'*H*)-amine (3xa)**

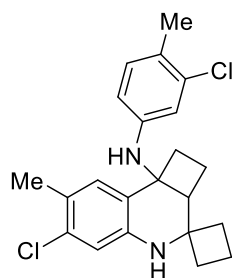

**3xa**, 46%

The general procedure was applied to 3-chloro-4-methylaniline (0.2 mmol), cyclobutanone oxime (0.4 mmol), Cu(CF<sub>3</sub>COO)<sub>2</sub> (11.58 mg, 0.04 mmol), *n*-hexane (2 mL) at 80 °C for 12 h. The crude product was purified by column chromatography on neutral alumina (EtOAc/PE 1:60) to afford the title compound as a yellow solid (18 mg, 46% yield). <sup>1</sup>H NMR (400 MHz, CDCl<sub>3</sub>) δ = 7.11 (s, 1H), 6.88 (d, *J* = 8.2 Hz, 1H), 6.67 (s, 1H), 6.48 (d, *J* = 2.4 Hz, 1H), 6.26 (dd, *J* = 8.3, 2.5 Hz, 1H), 4.01 (s, 2H), 2.86 (t, *J* = 8.5 Hz, 1H), 2.19 (d, *J* = 5.3 Hz, 8H), 2.04 – 1.85 (m, 5H), 1.74 (ddt, *J* = 14.0, 9.3, 4.7 Hz, 1H), 1.61 (t, *J* = 8.7 Hz, 2H). <sup>13</sup>C NMR (101 MHz, CDCl<sub>3</sub>) δ = 144.58, 142.01, 134.28, 132.88, 130.87, 128.76, 125.96, 125.82, 124.66, 115.77, 115.40, 113.93, 56.26, 54.99, 50.47, 37.79, 37.65, 33.70, 19.17, 18.84, 15.47, 12.65.

***N*-(3,5-Difluorophenyl)-6',8'-difluoro-2',2a'-dihydro-1'*H*-  
spiro[cyclobutane-1,3'-cyclobuta[*c*]quinolin]-8b'(4'*H*)-amine (3ya)<sup>[2]</sup>**

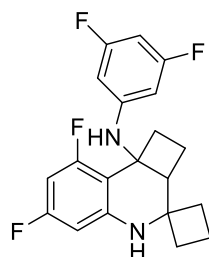

**3ya**, 39%

The general procedure was applied to 3,5-difluoroaniline (0.2 mmol), cyclobutanone oxime (0.4 mmol), Cu(CF<sub>3</sub>COO)<sub>2</sub> (11.58 mg, 0.04 mmol), *n*-hexane (2 mL) at 80 °C for 12 h. The crude product was purified by column chromatography on neutral alumina (EtOAc/PE 1:60) to afford the title compound as a white solid (12 mg, 39% yield). <sup>1</sup>H NMR (400 MHz, CDCl<sub>3</sub>) δ = 6.14 – 5.99 (m, 3H), 5.96 – 5.82 (m, 2H), 4.53 (s, 1H), 4.39 (s, 1H), 2.97 – 2.90 (m, 1H), 2.43 – 2.29 (m, 2H), 2.08 (td, *J* = 7.9, 3.8 Hz, 3H), 1.99 – 1.90 (m, 2H), 1.74 – 1.60 (m, 2H), 1.52 – 1.44 (m, 1H). <sup>13</sup>C NMR (101 MHz, CDCl<sub>3</sub>) δ = 164.85, 164.69, 164.08, 163.99, 163.91, 163.84, 162.43, 162.28, 161.64, 161.52, 161.48, 161.37, 147.80, 147.67, 147.54, 145.62, 145.49, 145.39, 105.80, 105.68, 105.65, 97.27, 97.18, 97.06, 96.98, 96.15, 96.12, 95.91, 95.88, 93.55, 93.29, 93.03, 92.59, 92.33, 92.07, 53.93, 53.59, 50.26, 38.93, 35.28, 34.78, 16.44, 12.29.

***N*-Phenyl-1'*H*,4'*H*-spiro[oxetane-3,3'-oxeto[2,3-*c*]quinolin]-8b'(2a'*H*)-amine (3ab)**

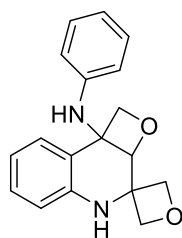

**3ab**, 76%

The general procedure was applied to aniline (0.2 mmol), oxetan-3-one (0.4 mmol),  $\text{Cu}(\text{CF}_3\text{COO})_2$  (11.58 mg, 0.04 mmol), n-hexane (2 mL) at 80 °C for 12 h. The crude product was purified by column chromatography on neutral alumina (EtOAc/PE 1:5) to afford the title compound as a white solid (22 mg, 76% yield).  $^1\text{H}$  NMR (400 MHz, DMSO)  $\delta$  = 7.00 (ddd,  $J$  = 19.9, 8.2, 6.8 Hz, 4H), 6.94 – 6.86 (m, 2H), 6.77 (s, 1H), 6.59 (t,  $J$  = 7.4 Hz, 1H), 6.52 (t,  $J$  = 7.3 Hz, 1H), 6.21 (d,  $J$  = 7.6 Hz, 2H), 5.01 (d,  $J$  = 2.0 Hz, 1H), 4.75 (d,  $J$  = 5.8 Hz, 1H), 4.57 (d,  $J$  = 6.5 Hz, 1H), 4.50 (d,  $J$  = 6.6 Hz, 1H), 4.36 (d,  $J$  = 6.0 Hz, 1H), 4.20 (dd,  $J$  = 16.1, 5.9 Hz, 2H).  $^{13}\text{C}$  NMR (101 MHz, DMSO)  $\delta$  = 145.94, 143.71, 143.66, 129.19, 128.33, 125.41, 124.37, 118.88, 117.16, 116.35, 116.32, 114.24, 92.78, 82.16, 81.21, 78.21, 56.80, 55.63.

***N*-Phenyl-1'*H*,4'*H*-spiro[thietane-3,3'-thieto[2,3-*c*]quinolin]-**

**8b'(2a'*H*)-amine (3ac)<sup>[2]</sup>**

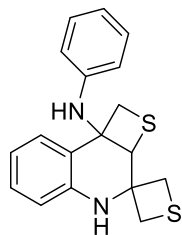

**3ac**, 78%

The general procedure was applied to aniline (0.2 mmol), thietan-3-one (0.4 mmol), Cu(CF<sub>3</sub>COO)<sub>2</sub> (11.58 mg, 0.04 mmol), *n*-hexane (2 mL) at 80 °C for 12 h. The crude product was purified by column chromatography on neutral alumina (EtOAc/PE 1:10) to afford the title compound as a white solid (25 mg, 78% yield). <sup>1</sup>H NMR (600 MHz, CDCl<sub>3</sub>) δ = 7.31 (dd, *J* = 7.8, 1.5 Hz, 1H), 7.11 (dd, *J* = 8.8, 7.4 Hz, 3H), 6.80 (td, *J* = 7.5, 1.2 Hz, 1H), 6.73 (t, *J* = 7.4 Hz, 2H), 6.64 (d, *J* = 7.5 Hz, 2H), 4.96 (s, 1H), 4.58 (s, 1H), 4.35 (s, 1H), 3.72 (d, *J* = 9.6 Hz, 1H), 3.14 (d, *J* = 10.3 Hz, 1H), 3.07 (d, *J* = 9.6 Hz, 1H), 2.99 (dd, *J* = 11.7, 2.2 Hz, 3H). <sup>13</sup>C NMR (151 MHz, CDCl<sub>3</sub>) δ = 144.63, 141.16, 129.48, 128.95, 127.96, 126.23, 120.77, 119.15, 116.74, 115.55, 61.02, 59.37, 56.41, 40.56, 39.12, 37.71.



**Dimethyl 8b'-(phenylamino)-2',2a',4',8b'-tetrahydro-1'H-spiro[cyclobutane-1,3'-cyclobuta[c]quinoline]-2',3-dicarboxylate**  
**(3ad)<sup>[2]</sup>**

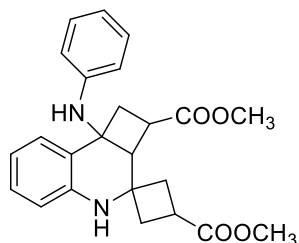

**3ad**, 37%

The general procedure was applied to aniline (0.2 mmol), methyl 3-oxocyclobutane-1-carboxylate (0.4 mmol), Cu(CF<sub>3</sub>COO)<sub>2</sub> (11.58 mg, 0.04 mmol), *n*-hexane (2 mL) at 80 °C for 12 h. The crude product was purified by column chromatography on neutral alumina (EtOAc/PE 1:10) to afford the title compound as a colorless liquid (15 mg, 37% yield). <sup>1</sup>H NMR (400 MHz, CDCl<sub>3</sub>) δ = 7.40 (d, *J* = 7.7 Hz, 1H), 7.13 – 7.02 (m, 3H), 6.79 (t, *J* = 7.5 Hz, 1H), 6.70 (dd, *J* = 14.6, 7.6 Hz, 2H), 6.46 (d, *J* = 8.7 Hz, 2H), 4.34 (s, 1H), 4.11 (s, 1H), 3.73 (s, 3H), 3.61 (s, 3H), 3.18 – 3.06 (m, 2H), 2.84 (dt, *J* = 9.1, 6.9 Hz, 1H), 2.69 – 2.56 (m, 2H), 2.35 (dd, *J* = 12.1, 9.6 Hz, 1H), 2.26 – 2.20 (m, 1H), 2.14 (d, *J* = 8.6 Hz, 2H). <sup>13</sup>C NMR (101 MHz, CDCl<sub>3</sub>) δ = 175.94, 175.30, 145.41, 142.39, 128.88, 128.01, 127.71, 126.78, 120.02, 118.35, 116.26, 115.85, 56.53, 54.12, 52.91, 52.11, 51.90, 40.03, 39.80, 35.69, 32.58, 30.56.

**Diethyl 8b'-(phenylamino)-2',2a',4',8b'-tetrahydro-1'H-spiro[cyclobutane-1,3'-cyclobuta[c]quinoline]-2',3-dicarboxylate (3ae)**

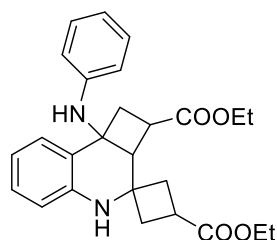

**3ae**, 40%

The general procedure was applied to aniline (0.2 mmol), 3-oxocyclobutyl propionate (0.4 mmol), Cu(CF<sub>3</sub>COO)<sub>2</sub> (11.58 mg, 0.04 mmol), *n*-hexane (2 mL) at 80 °C for 12 h. The crude product was purified by column chromatography on neutral alumina (EtOAc/PE 1:10) to afford the title compound as a white solid (17 mg, 40% yield). <sup>1</sup>H NMR (400 MHz, CDCl<sub>3</sub>) δ = 7.37 (d, *J* = 7.8 Hz, 1H), 7.12 – 7.01 (m, 3H), 6.76 (t, *J* = 7.5 Hz, 1H), 6.73 – 6.65 (m, 2H), 6.52 – 6.45 (m, 2H), 4.49 (s, 1H), 4.32 (s, 1H), 4.21 – 4.09 (m, 4H), 3.07 (d, *J* = 7.1 Hz, 1H), 2.87 – 2.79 (m, 1H), 2.75 (q, *J* = 7.6 Hz, 1H), 2.67 (dd, *J* = 11.8, 7.5 Hz, 1H), 2.47 (ddd, *J* = 12.3, 8.8, 3.1 Hz, 1H), 2.38 (dd, *J* = 11.8, 9.3 Hz, 1H), 2.28 – 2.18 (m, 2H), 2.05 (dd, *J* = 12.0, 7.5 Hz, 1H), 1.26 (dd, *J* = 15.5, 6.9 Hz, 7H). <sup>13</sup>C NMR (101 MHz, CDCl<sub>3</sub>) δ = 176.35, 175.56, 145.46, 142.17, 128.93, 127.83, 126.96, 126.93, 119.69, 118.24, 116.10, 115.70, 60.84, 60.79, 55.55, 54.02, 51.48, 40.64, 40.46, 36.12, 32.81, 29.65, 14.23, 14.19.

## Single-crystal data of compound 3aa

Datablock jqq01 - ellipsoid plot

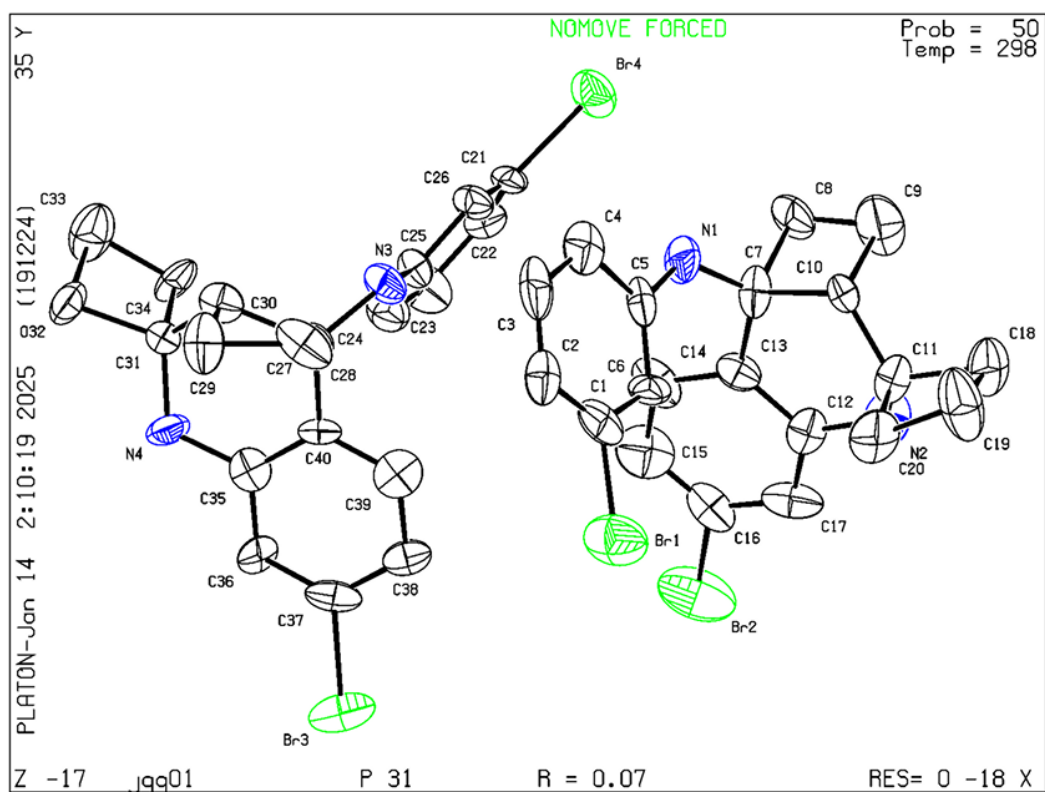

Structure factors have been supplied for datablock(s) jqq01

No syntax errors found. CIF dictionary Interpreting this report

|                 |                            |                           |                           |
|-----------------|----------------------------|---------------------------|---------------------------|
| Bond precision: | C-C = 0.0248 Å             | Wavelength=0.71073        |                           |
| Cell:           | a=10.5820 (15)<br>alpha=90 | b=10.5820 (15)<br>beta=90 | c=28.192 (4)<br>gamma=120 |
| Temperature:    | 298 K                      |                           |                           |
|                 | Calculated                 | Reported                  |                           |
| Volume          | 2734.0 (9)                 | 2734.0 (9)                |                           |
| Space group     | P 31                       | P 31                      |                           |
| Hall group      | P 31                       | P 31                      |                           |
| Moiety formula  | C20 Br2 N2                 | 2 (Br2 C20 N2)            |                           |
| Sum formula     | C20 Br2 N2                 | C40 Br4 N4                |                           |
| Mr              | 428.02                     | 856.08                    |                           |
| Dx, g cm-3      | 1.560                      | 1.560                     |                           |
| Z               | 6                          | 3                         |                           |
| Mu (mm-1)       | 4.448                      | 4.448                     |                           |
| F000            | 1224.0                     | 1224.0                    |                           |
| F000'           | 1221.11                    |                           |                           |
| h, k, lmax      | 13, 13, 36                 | 13, 13, 36                |                           |
| Nref            | 8446 [ 4223]               | 6917                      |                           |
| Tmin, Tmax      | 0.566, 0.641               | 0.422, 0.746              |                           |
| Tmin'           | 0.555                      |                           |                           |

Data completeness= 1.64/0.82                      Theta (max)= 27.568

[illegible]

The following ALERTS were generated. Each ALERT has the format  
**test-name\_ALERT\_alert-type\_alert-level.**  
Click on the hyperlinks for more details of the test.

#### ● Alert level B

PLAT241\_ALERT\_2\_B High 'MainMol' Ueq as Compared to Neighbors of C9 Check  
PLAT341\_ALERT\_3\_B Low Bond Precision on C-C Bonds ..... 0.02477 Ang.

#### ● Alert level C

PLAT041\_ALERT\_1\_C Calc. and Reported SumFormula Strings Differ Please Check  
Calc: C20 Br2 N2  
Rep.: C40 Br4 N4  
PLAT042\_ALERT\_1\_C Calc. and Reported MoietyFormula Strings Differ Please Check  
Calc: C20 Br2 N2  
Rep.: 2(Br2 C20 N2)  
PLAT057\_ALERT\_3\_C Correction for Absorption Required RT(exp) ... 1.13 Do !  
PLAT241\_ALERT\_2\_C High 'MainMol' Ueq as Compared to Neighbors of N2 Check  
PLAT241\_ALERT\_2\_C High 'MainMol' Ueq as Compared to Neighbors of C19 Check  
PLAT241\_ALERT\_2\_C High 'MainMol' Ueq as Compared to Neighbors of C33 Check  
PLAT242\_ALERT\_2\_C Low 'MainMol' Ueq as Compared to Neighbors of C8 Check  
PLAT242\_ALERT\_2\_C Low 'MainMol' Ueq as Compared to Neighbors of C10 Check  
PLAT242\_ALERT\_2\_C Low 'MainMol' Ueq as Compared to Neighbors of C16 Check  
PLAT906\_ALERT\_3\_C Large K Value in the Analysis of Variance ..... 4.669 Check  
PLAT906\_ALERT\_3\_C Large K Value in the Analysis of Variance ..... 2.391 Check  
PLAT911\_ALERT\_3\_C Missing FCF Refl Between Thmin & STh/L= 0.600 62 Report  
-6 11 0, 5 6 1, 0 1 2, 5 6 2, -6 10 6, -5 10 8,  
-4 10 9, -3 10 9, -8 9 11, -7 9 11, -11 7 12, -8 9 12,  
-7 9 12, -5 9 12, -7 9 13, -6 9 13, -3 9 13, -10 7 14,  
-8 8 14, -6 9 14, -9 7 15, -7 8 15, -6 8 15, -5 8 15,  
-8 7 16, -4 7 16, -7 8 16, -6 8 16, -5 8 16, -4 8 16,  
-8 7 17, -7 7 17, -4 7 17, -6 8 17, -5 8 17, -4 8 17,  
-8 6 18, -7 7 18, -6 7 18, -4 7 18, -5 8 18, -4 8 18,  
-6 7 19, -5 7 19, -4 7 19, -3 7 19, -1 7 19, -5 8 19,  
-4 8 19, -5 7 20, -4 7 20, -6 6 21, -5 6 21, -6 6 22,  
-5 6 22, -2 6 22, -6 5 23, -5 6 23, -6 5 24, -5 5 24,  
0 5 25, 0 0 30,  
PLAT915\_ALERT\_3\_C No Flack x Check Done: Low Friedel Pair Coverage 66 %

#### ● Alert level G

PLAT002\_ALERT\_2\_G Number of Distance or Angle Restraints on AtSite 16 Note  
PLAT040\_ALERT\_1\_G No H-atoms in this Carbon Containing Compound .. Please Check  
PLAT045\_ALERT\_1\_G Calculated and Reported Z Differ by a Factor ... 2 Check  
PLAT172\_ALERT\_4\_G The CIF-Embedded .res File Contains DFIX Records 4 Report  
PLAT850\_ALERT\_4\_G Check Flack Parameter Exact Value 0.00 with s.u. 0.02 Check  
PLAT860\_ALERT\_3\_G Number of Least-Squares Restraints ..... 9 Note  
PLAT910\_ALERT\_3\_G Missing # of FCF Reflection(s) Below Theta(Min). 3 Note  
0 1 0, -1 1 1, 0 0 3,  
PLAT912\_ALERT\_4\_G Missing # of FCF Reflections Above STh/L= 0.600 21 Note  
PLAT933\_ALERT\_2\_G Number of HKL-OMIT Records in Embedded .res File 2 Note  
0 1 2, -1 1 -2,  
PLAT941\_ALERT\_3\_G Average HKL Measurement Multiplicity ..... 2.8 Low  
PLAT969\_ALERT\_5\_G The 'Henn et al.' R-Factor-gap value ..... 1.245 Note

## 6. References

- [1] Olive, G.; Le Moigne, F.; Mercier, A.; Rockenbauer, A.; Tordo, P. *J. Org. Chem.* **1998**, *63*, 9095.
- [2] Chen, C.; Wang, Z.; Wang, S.; Xu, L.; Zeng, X. *Org. Lett.* **2023**, *25*, 4241.

## 7. $^1\text{H}$ and $^{13}\text{C}$ NMR spectra

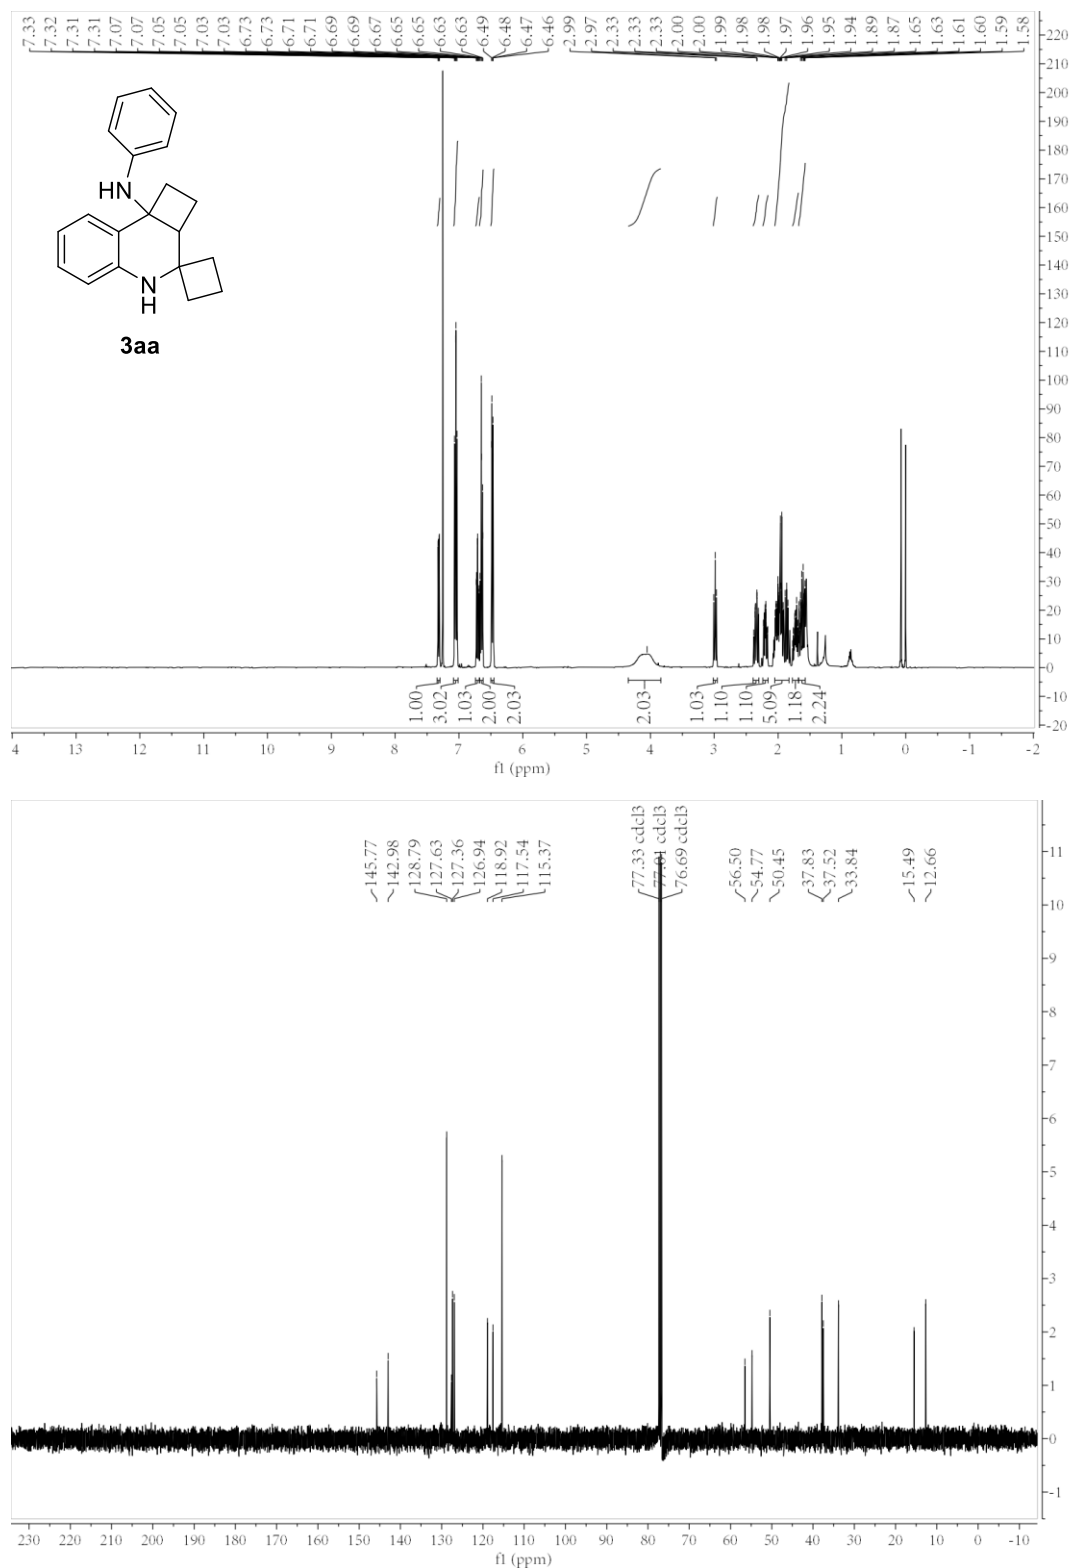

Figure S1.  $^1\text{H}$  (400 MHz,  $\text{CDCl}_3$ ) and  $^{13}\text{C}$  (101 MHz,  $\text{CDCl}_3$ ) NMR spectra for compound **3aa**

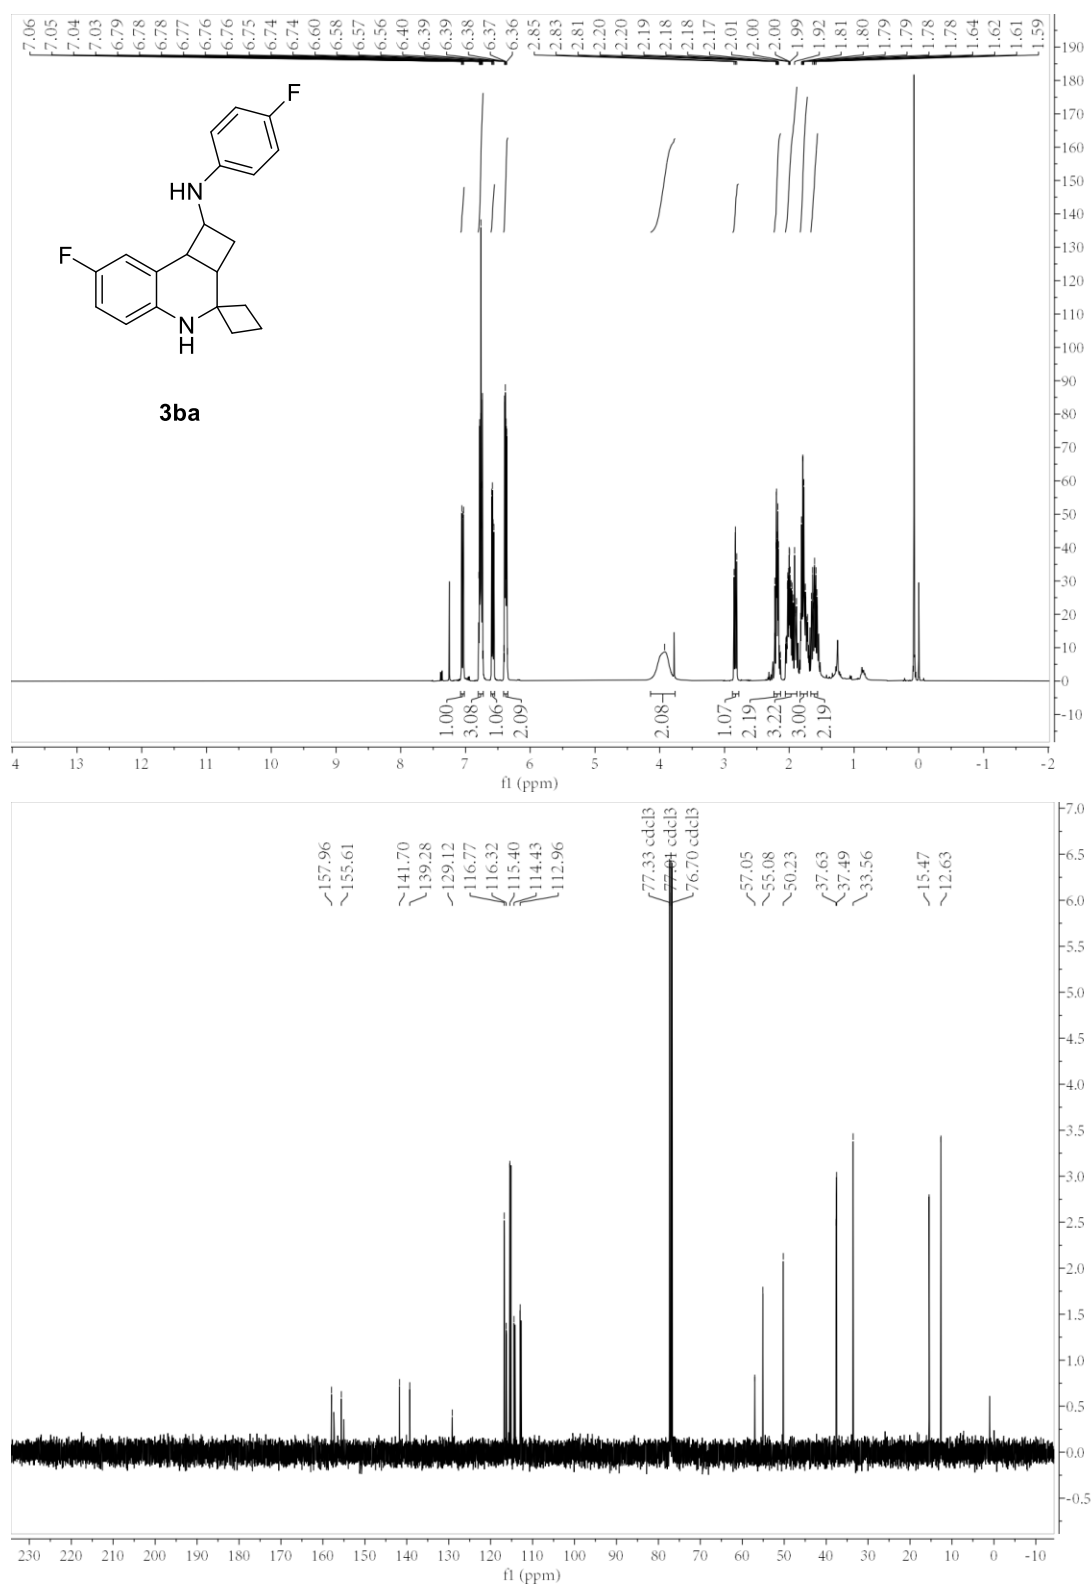

Figure S2. <sup>1</sup>H (400 MHz, CDCl<sub>3</sub>) and <sup>13</sup>C (101 MHz, CDCl<sub>3</sub>) NMR spectra for compound **3ba**



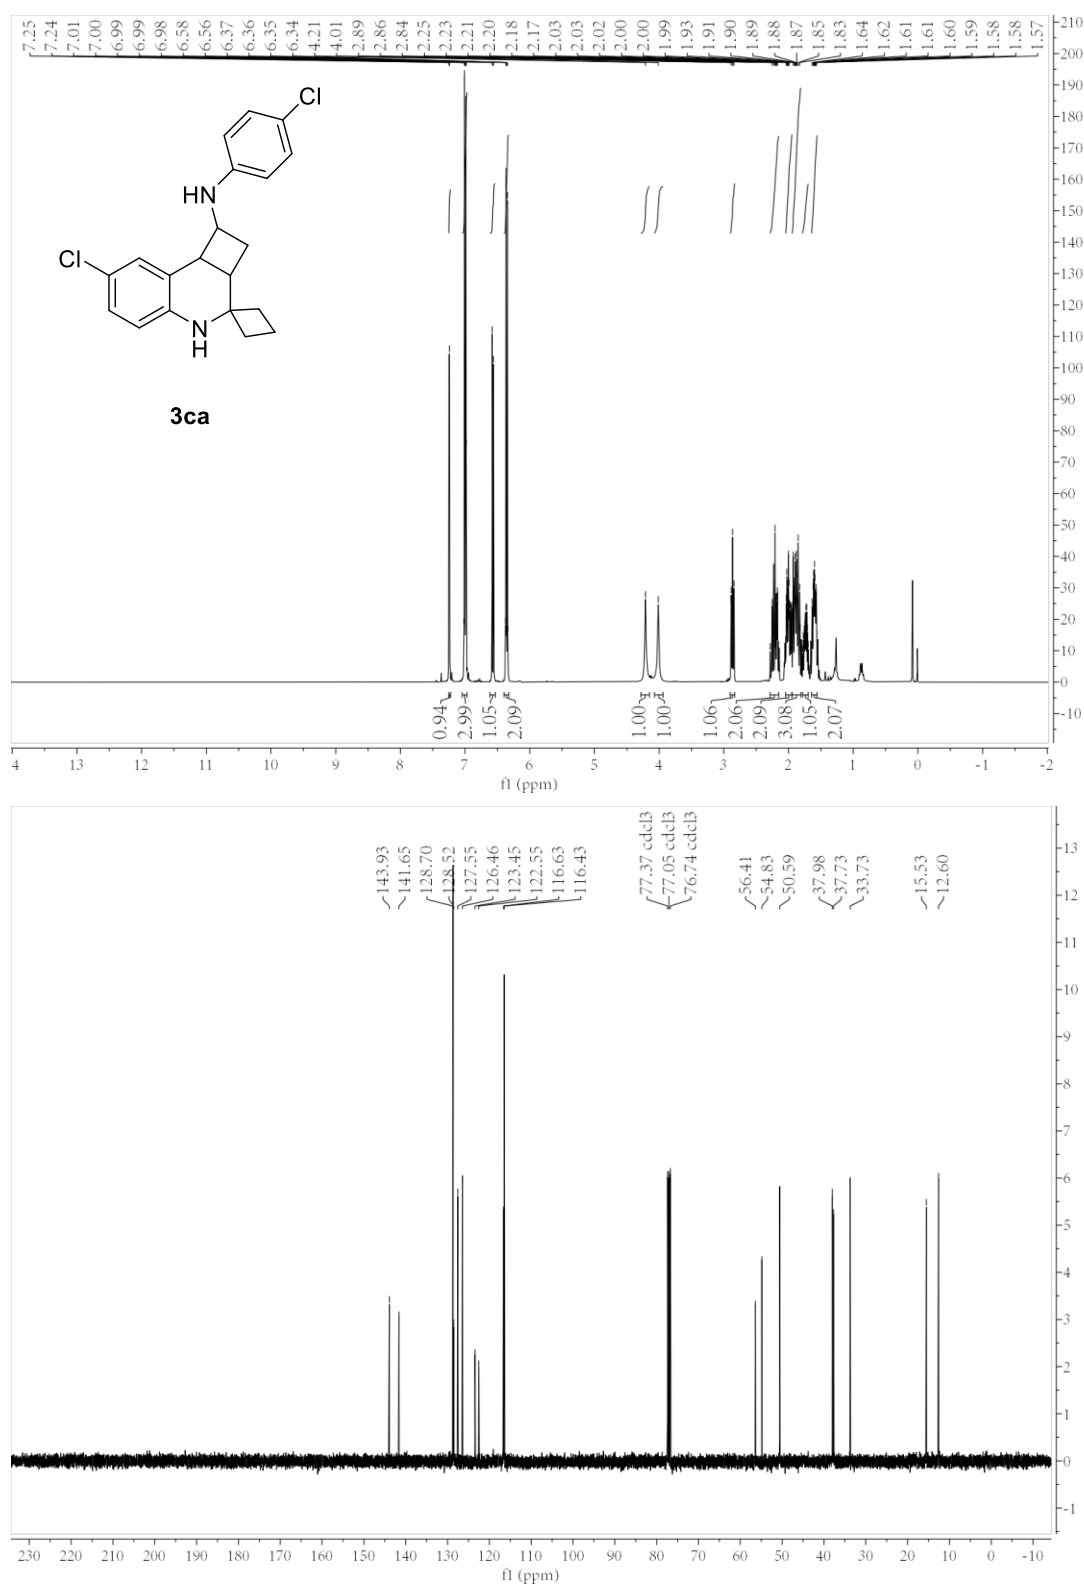

Figure S3. <sup>1</sup>H (400 MHz, CDCl<sub>3</sub>) and <sup>13</sup>C (101 MHz, CDCl<sub>3</sub>) NMR spectra for compound **3ca**

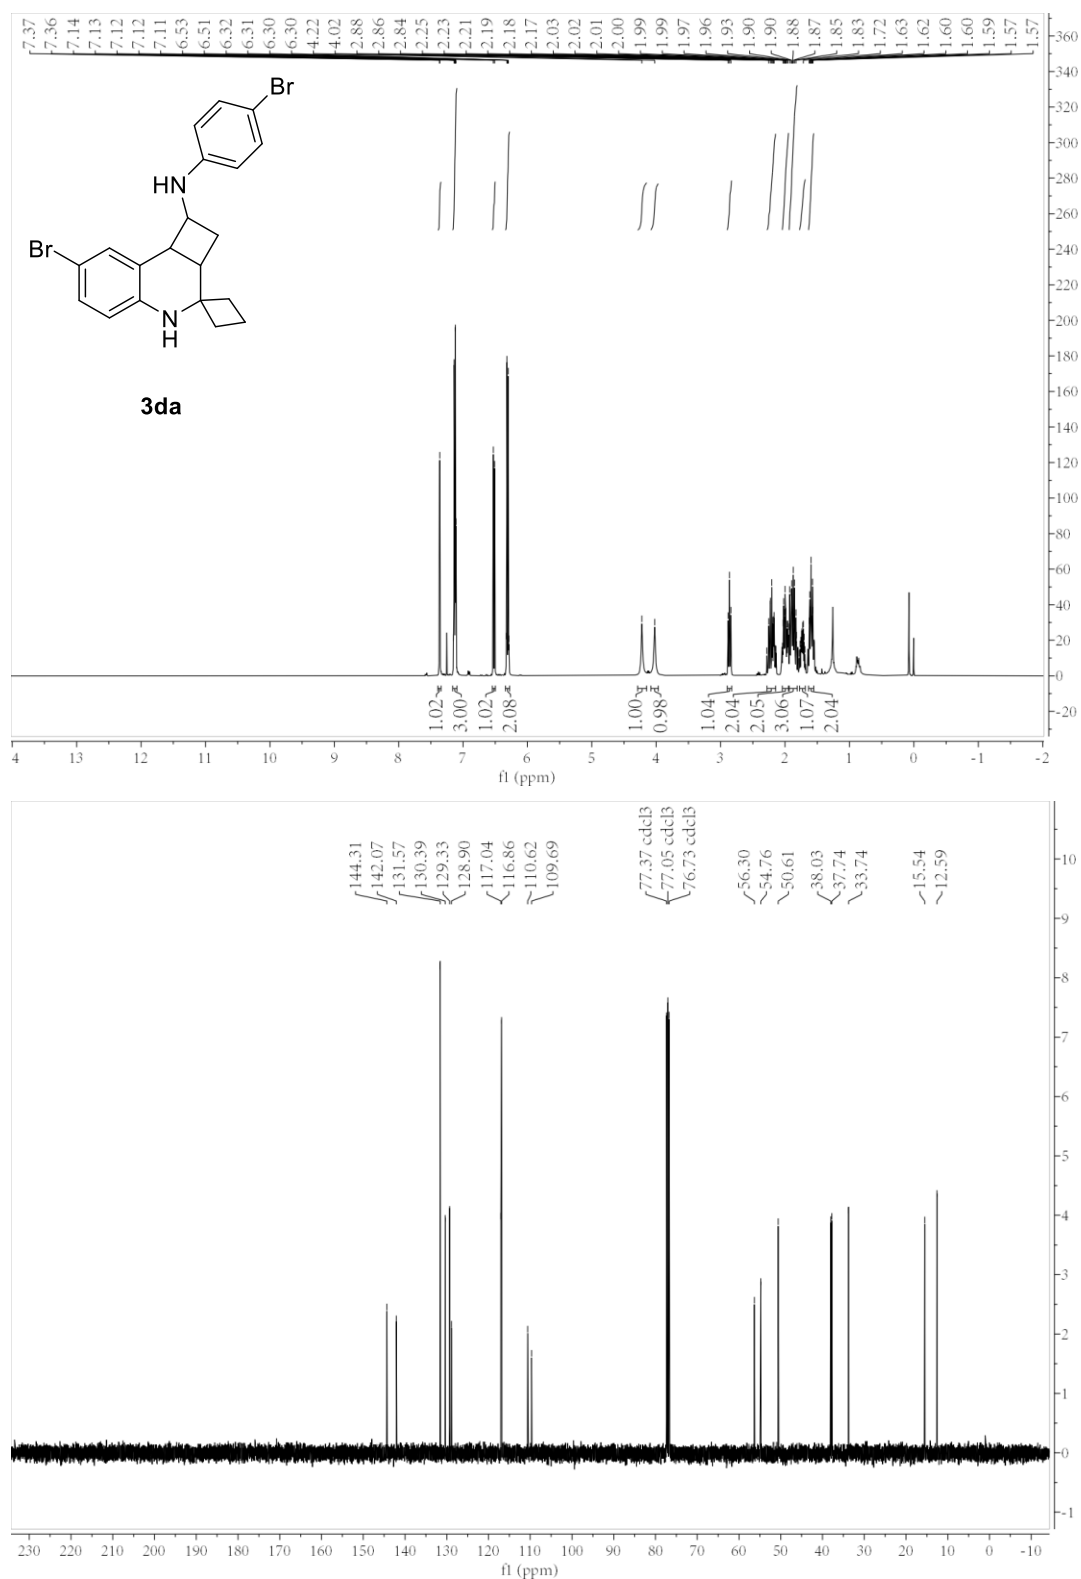

Figure S4. <sup>1</sup>H (400 MHz, CDCl<sub>3</sub>) and <sup>13</sup>C (101 MHz, CDCl<sub>3</sub>) NMR spectra for compound **3da**



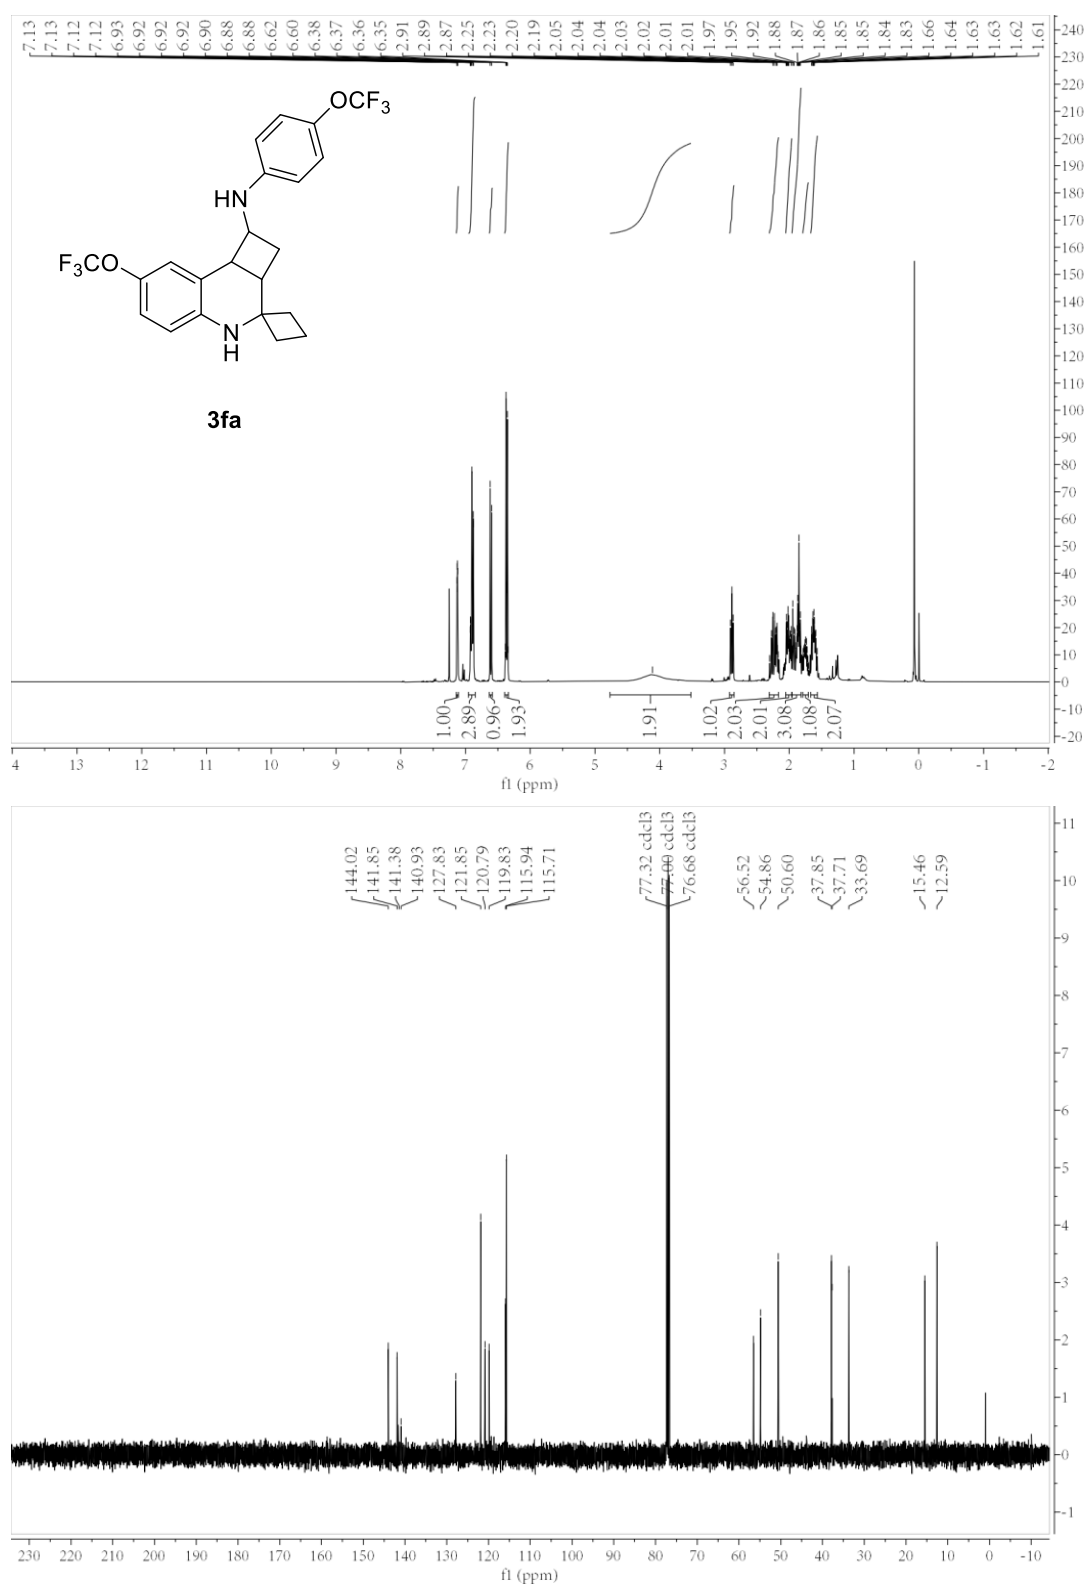

Figure S6. <sup>1</sup>H (400 MHz, CDCl<sub>3</sub>) and <sup>13</sup>C (101 MHz, CDCl<sub>3</sub>) NMR spectra for compound **3fa**

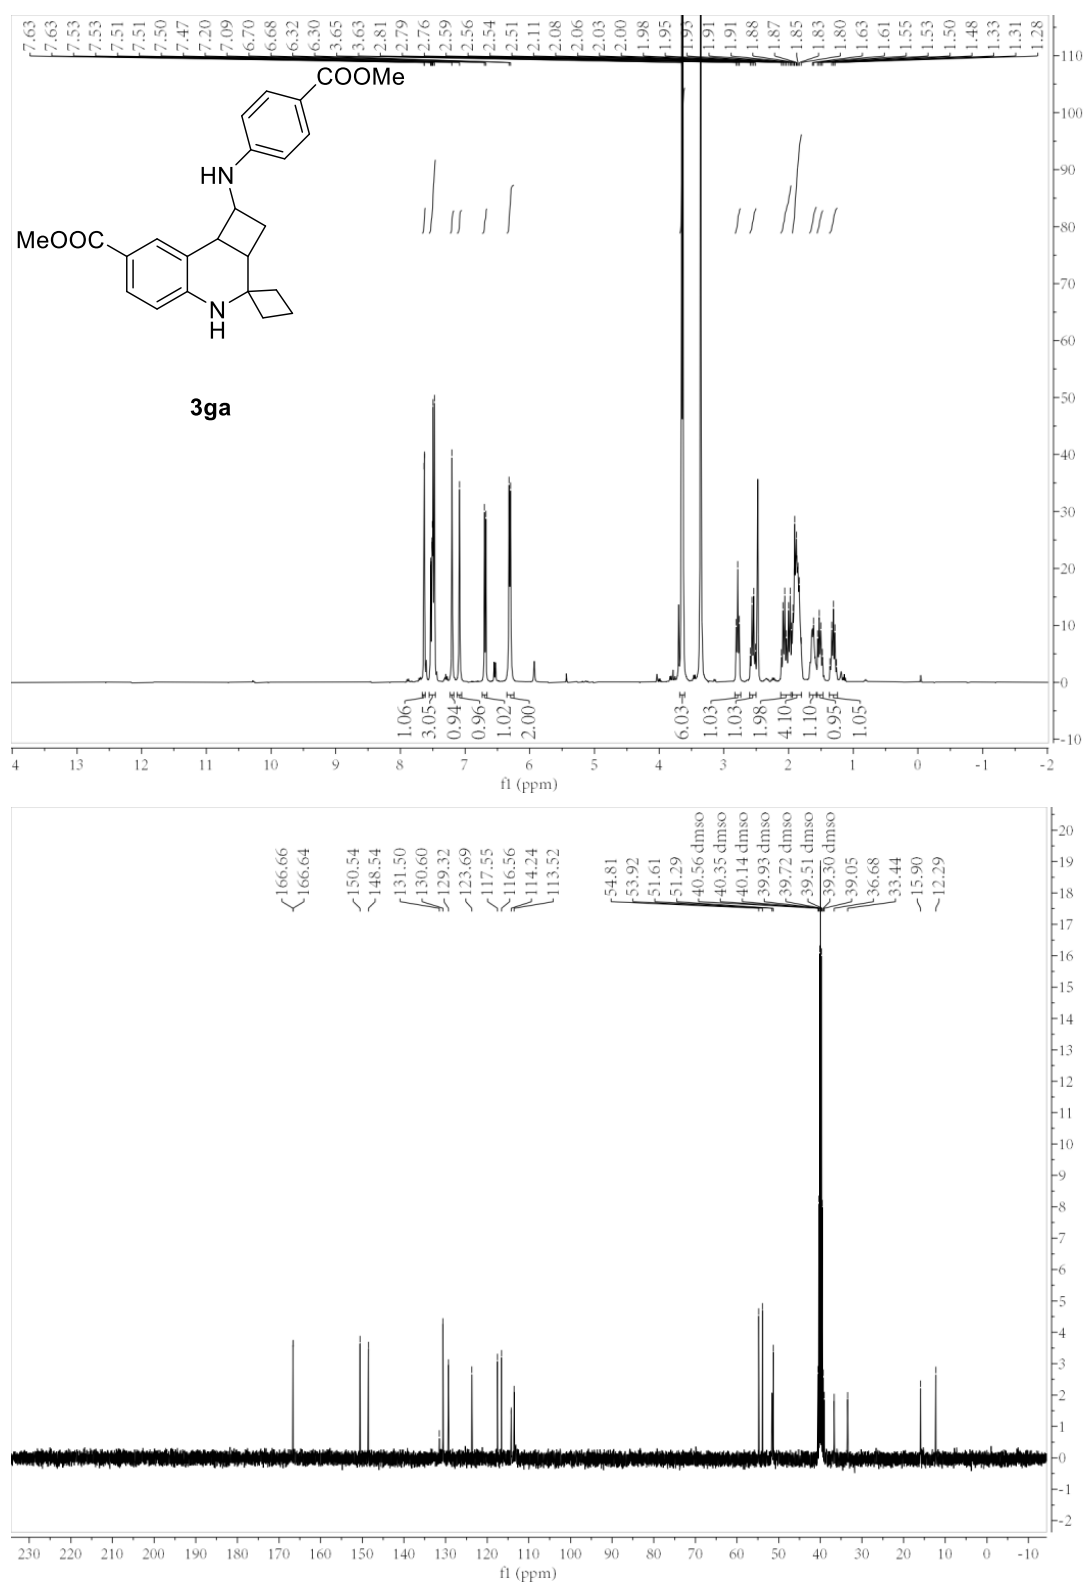

Figure S7. <sup>1</sup>H (400 MHz, DMSO) and <sup>13</sup>C (101 MHz, DMSO) NMR spectra for compound **3ga**

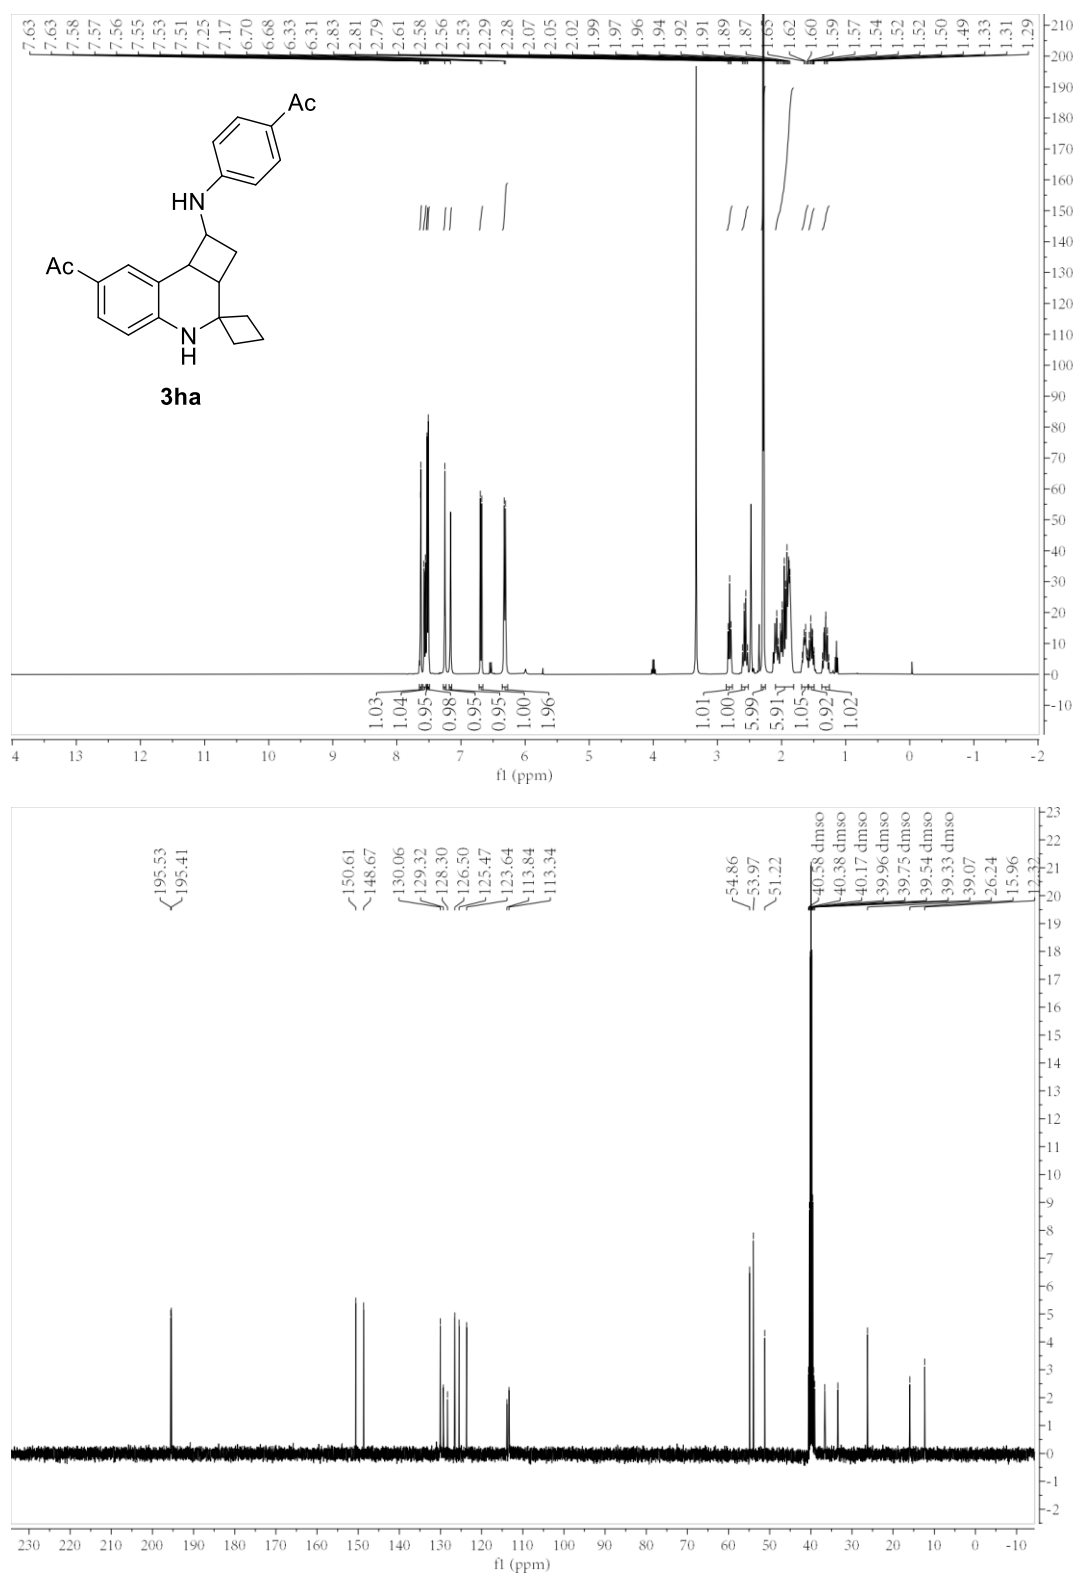

Figure S8. <sup>1</sup>H (400 MHz, DMSO) and <sup>13</sup>C (101 MHz, DMSO) NMR spectra for compound **3ha**

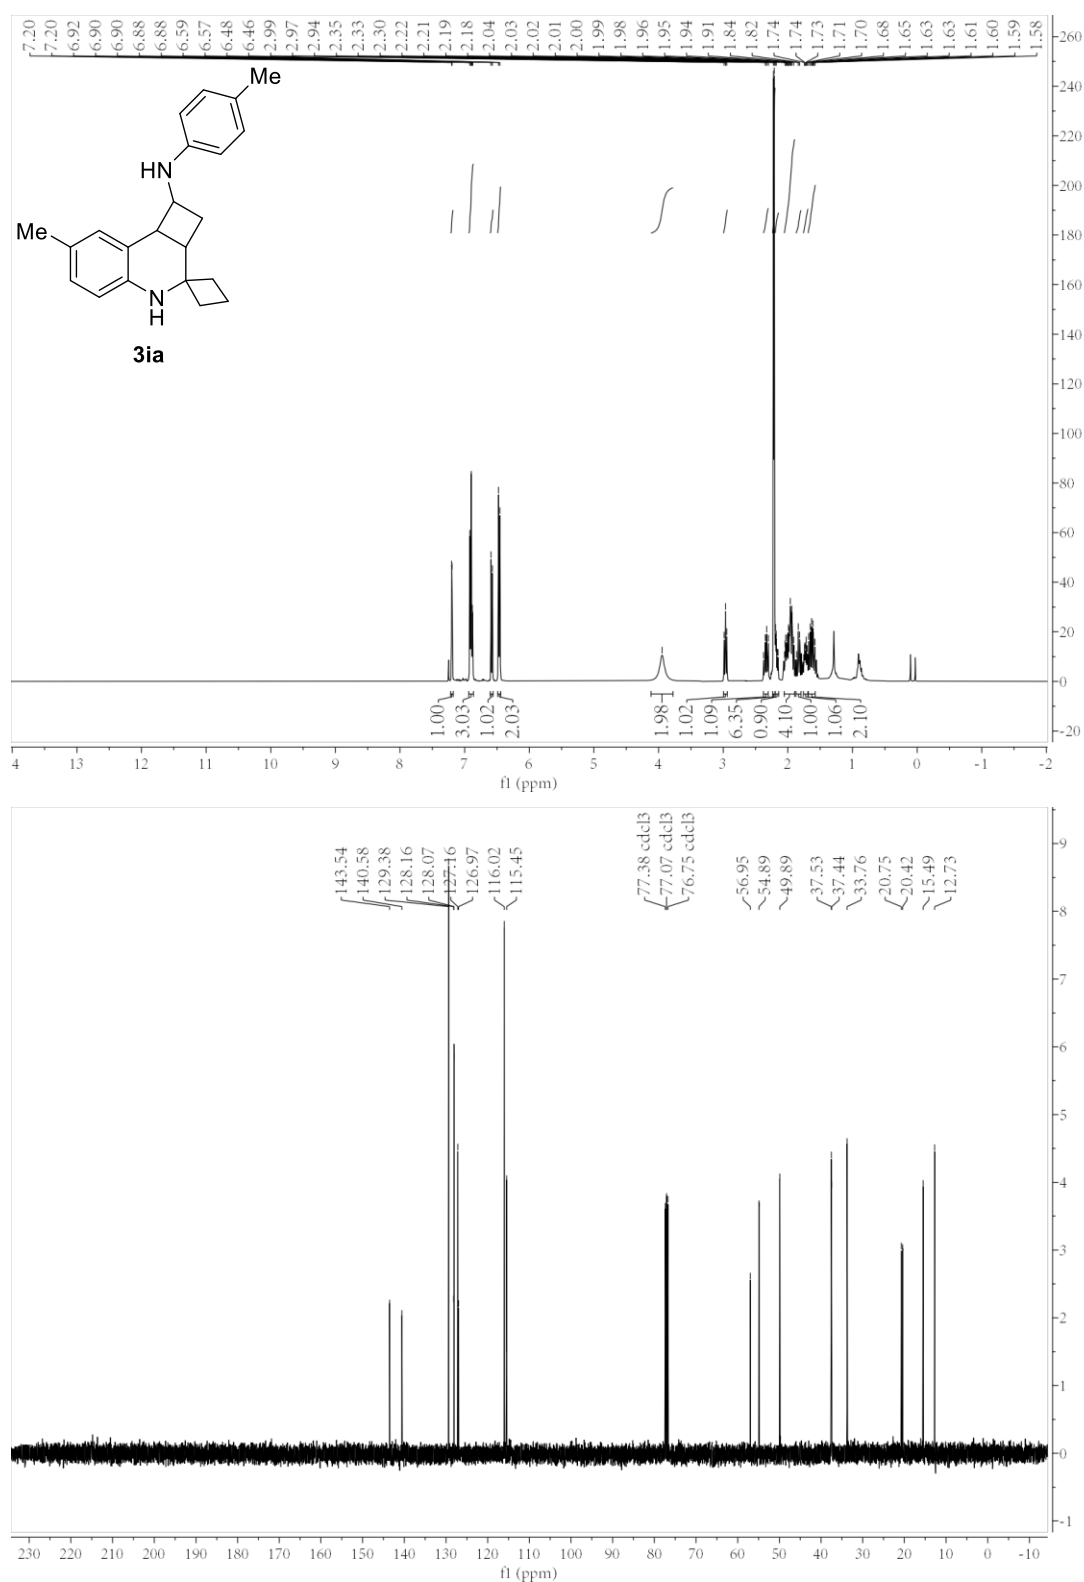

Figure S9. <sup>1</sup>H (400 MHz, CDCl<sub>3</sub>) and <sup>13</sup>C (101 MHz, CDCl<sub>3</sub>) NMR spectra for compound **3ia**

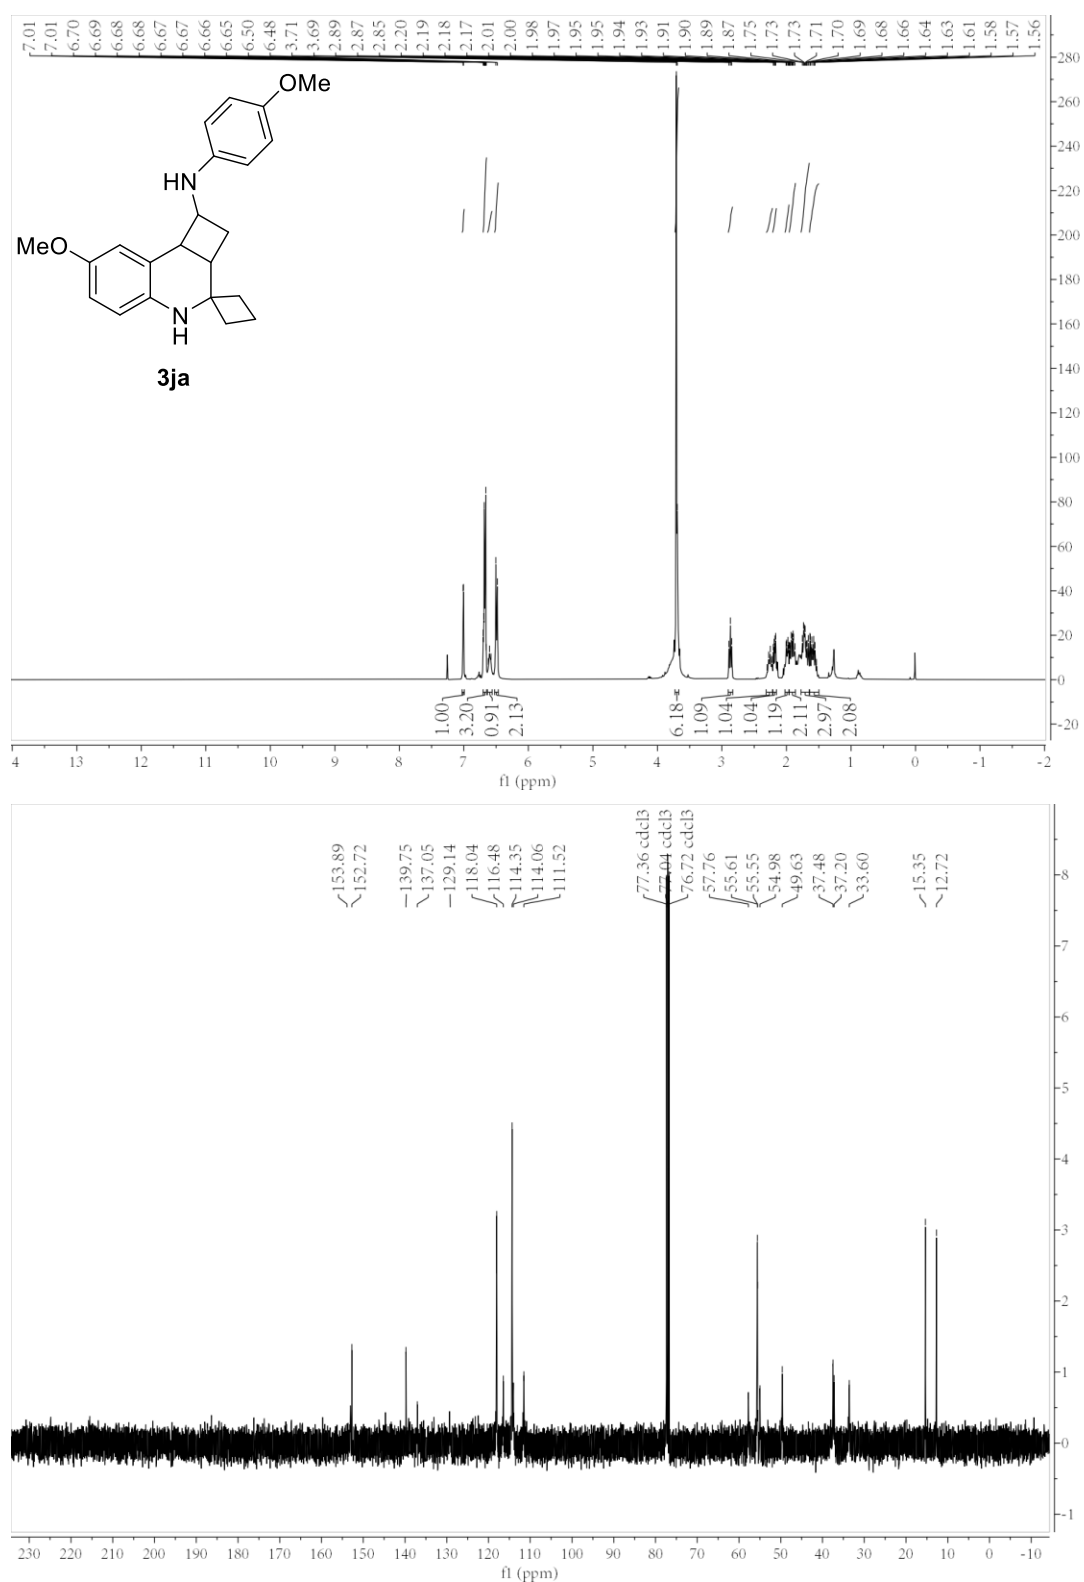

Figure S10. <sup>1</sup>H (400 MHz, CDCl<sub>3</sub>) and <sup>13</sup>C (101 MHz, CDCl<sub>3</sub>) NMR spectra for compound **3Ja**



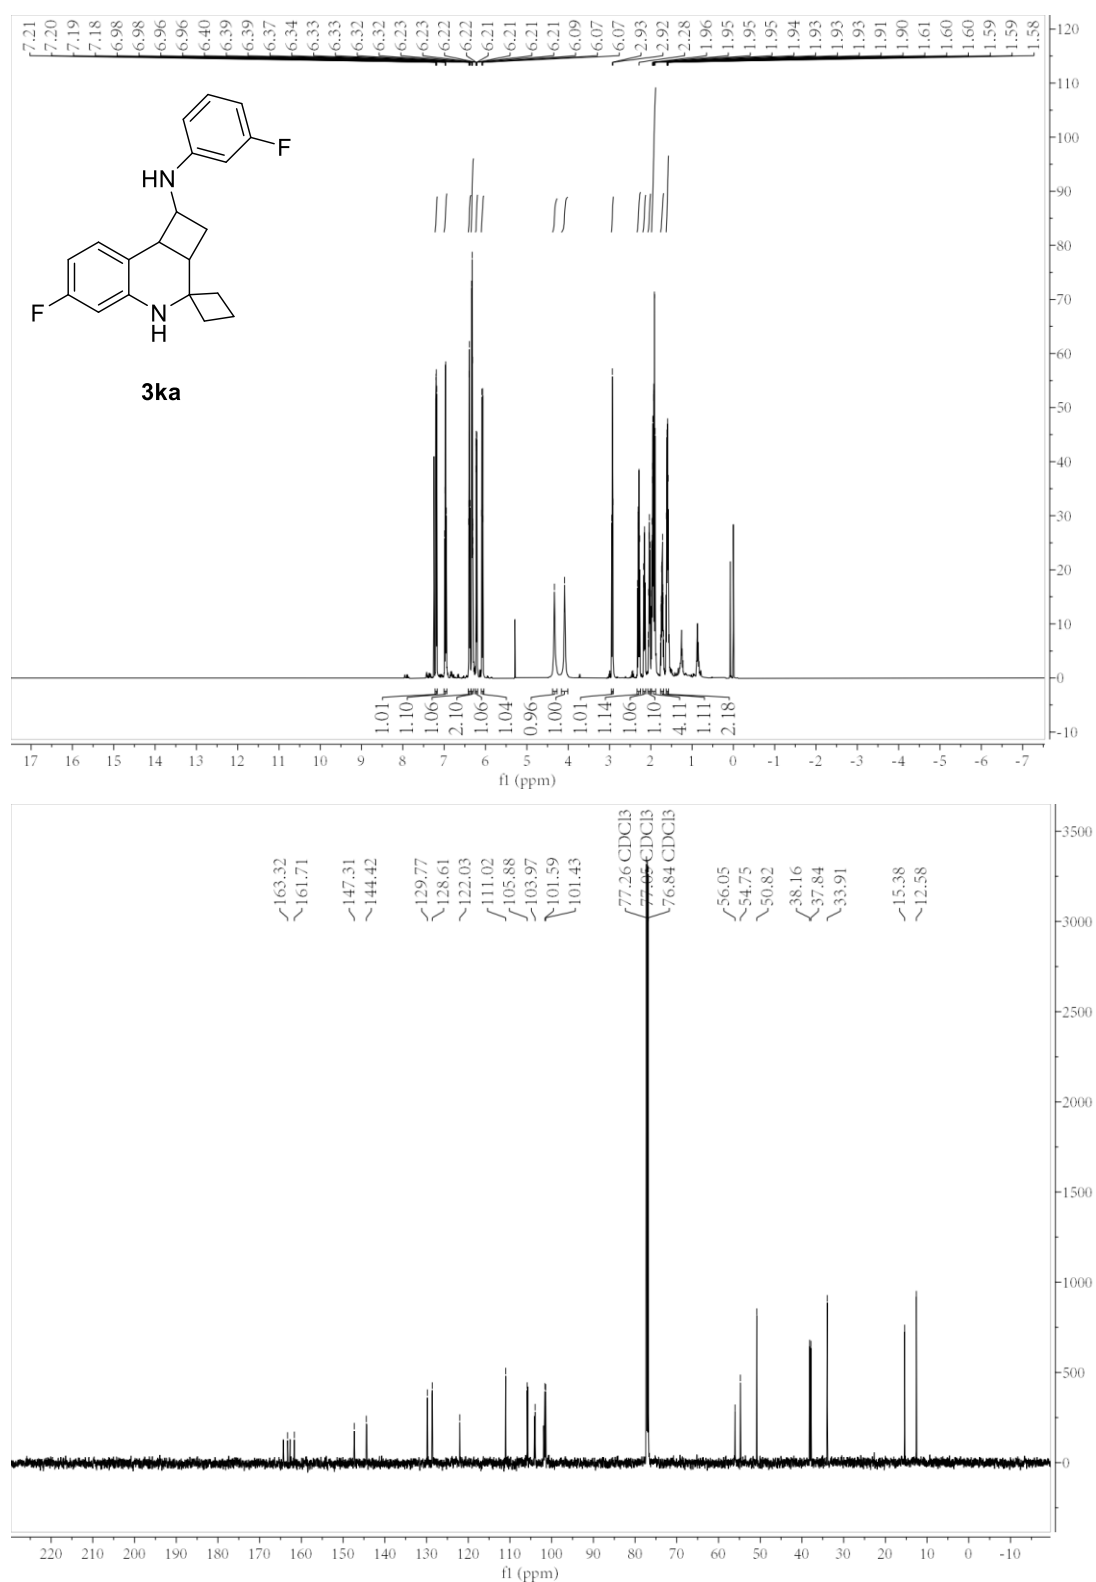

Figure S11. <sup>1</sup>H (400 MHz, CDCl<sub>3</sub>) and <sup>13</sup>C (101 MHz, CDCl<sub>3</sub>) NMR spectra for compound **3ka**

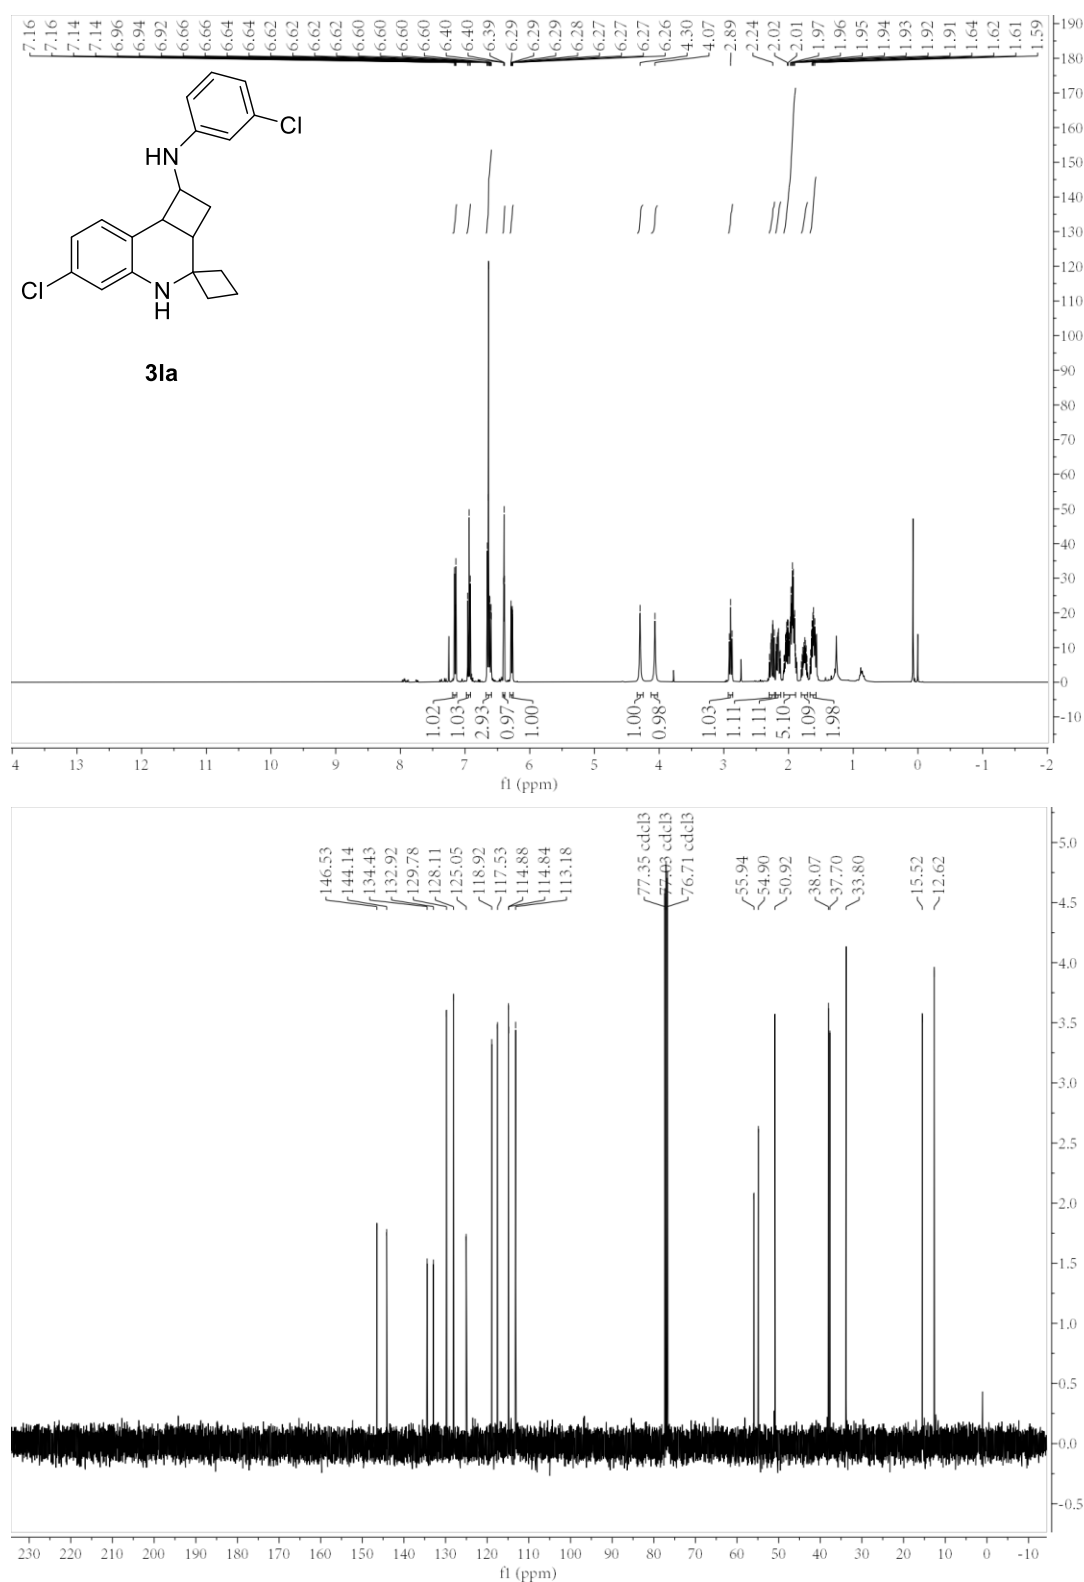

Figure S12. <sup>1</sup>H (400 MHz, CDCl<sub>3</sub>) and <sup>13</sup>C (101 MHz, CDCl<sub>3</sub>) NMR spectra for compound **3la**

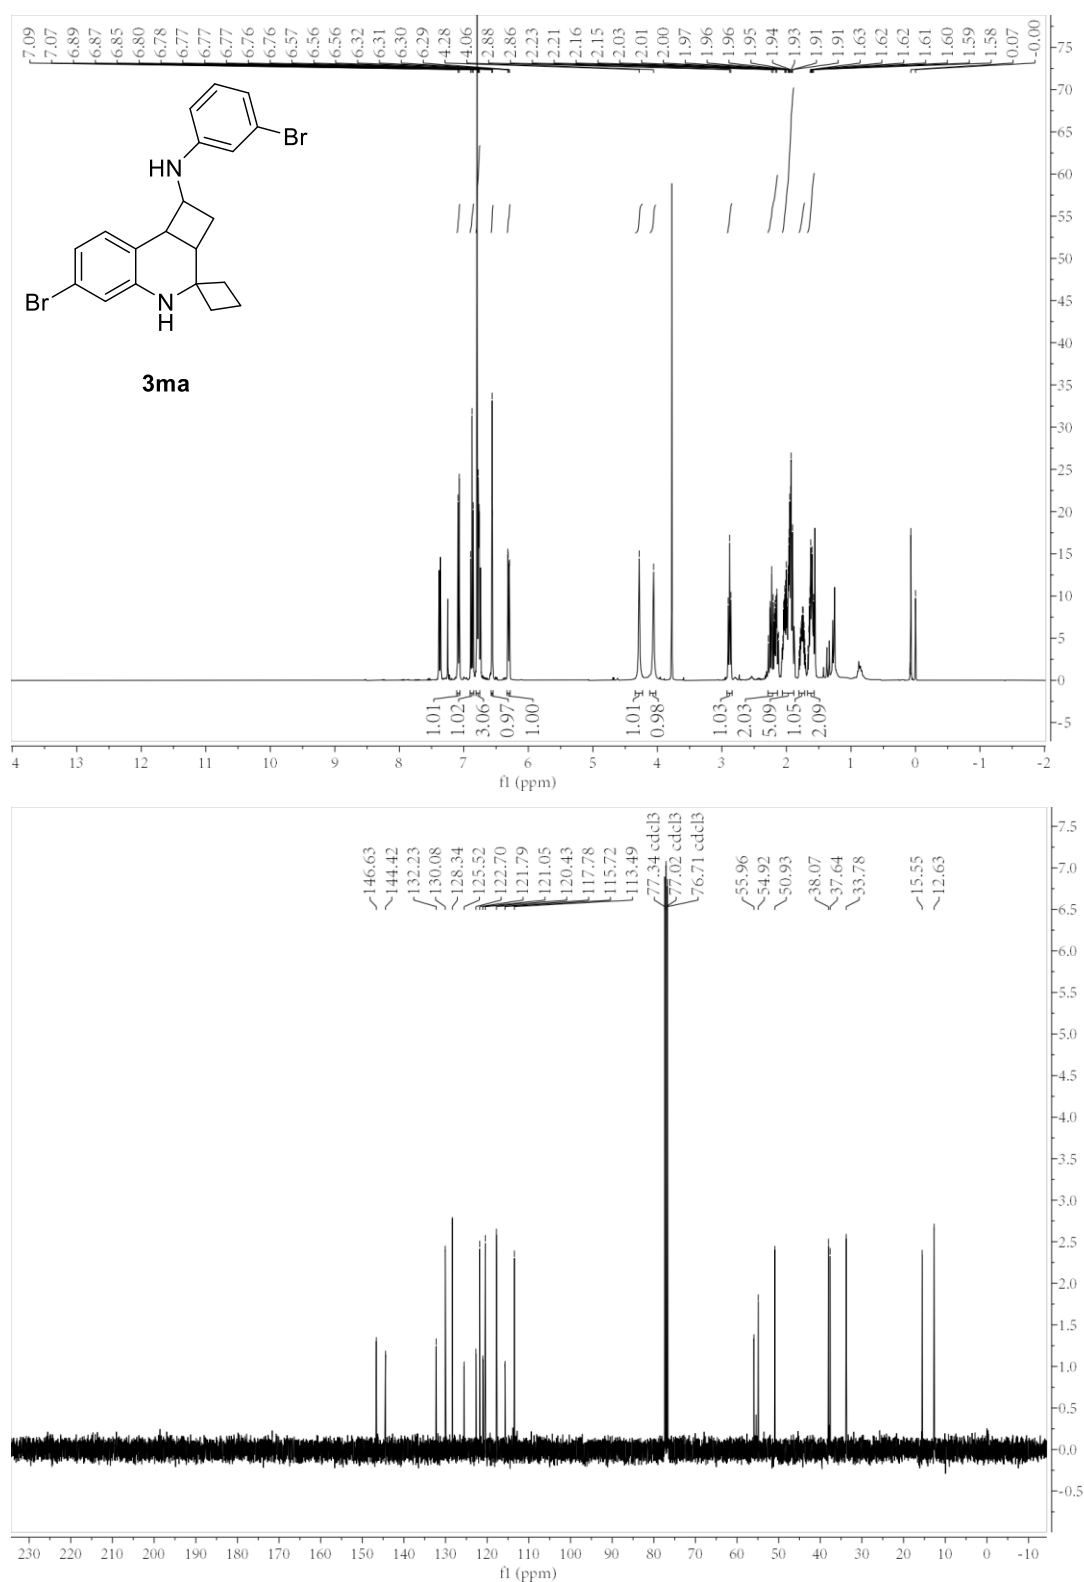

Figure S13. <sup>1</sup>H (400 MHz, CDCl<sub>3</sub>) and <sup>13</sup>C (101 MHz, CDCl<sub>3</sub>) NMR spectra for compound **3ma**

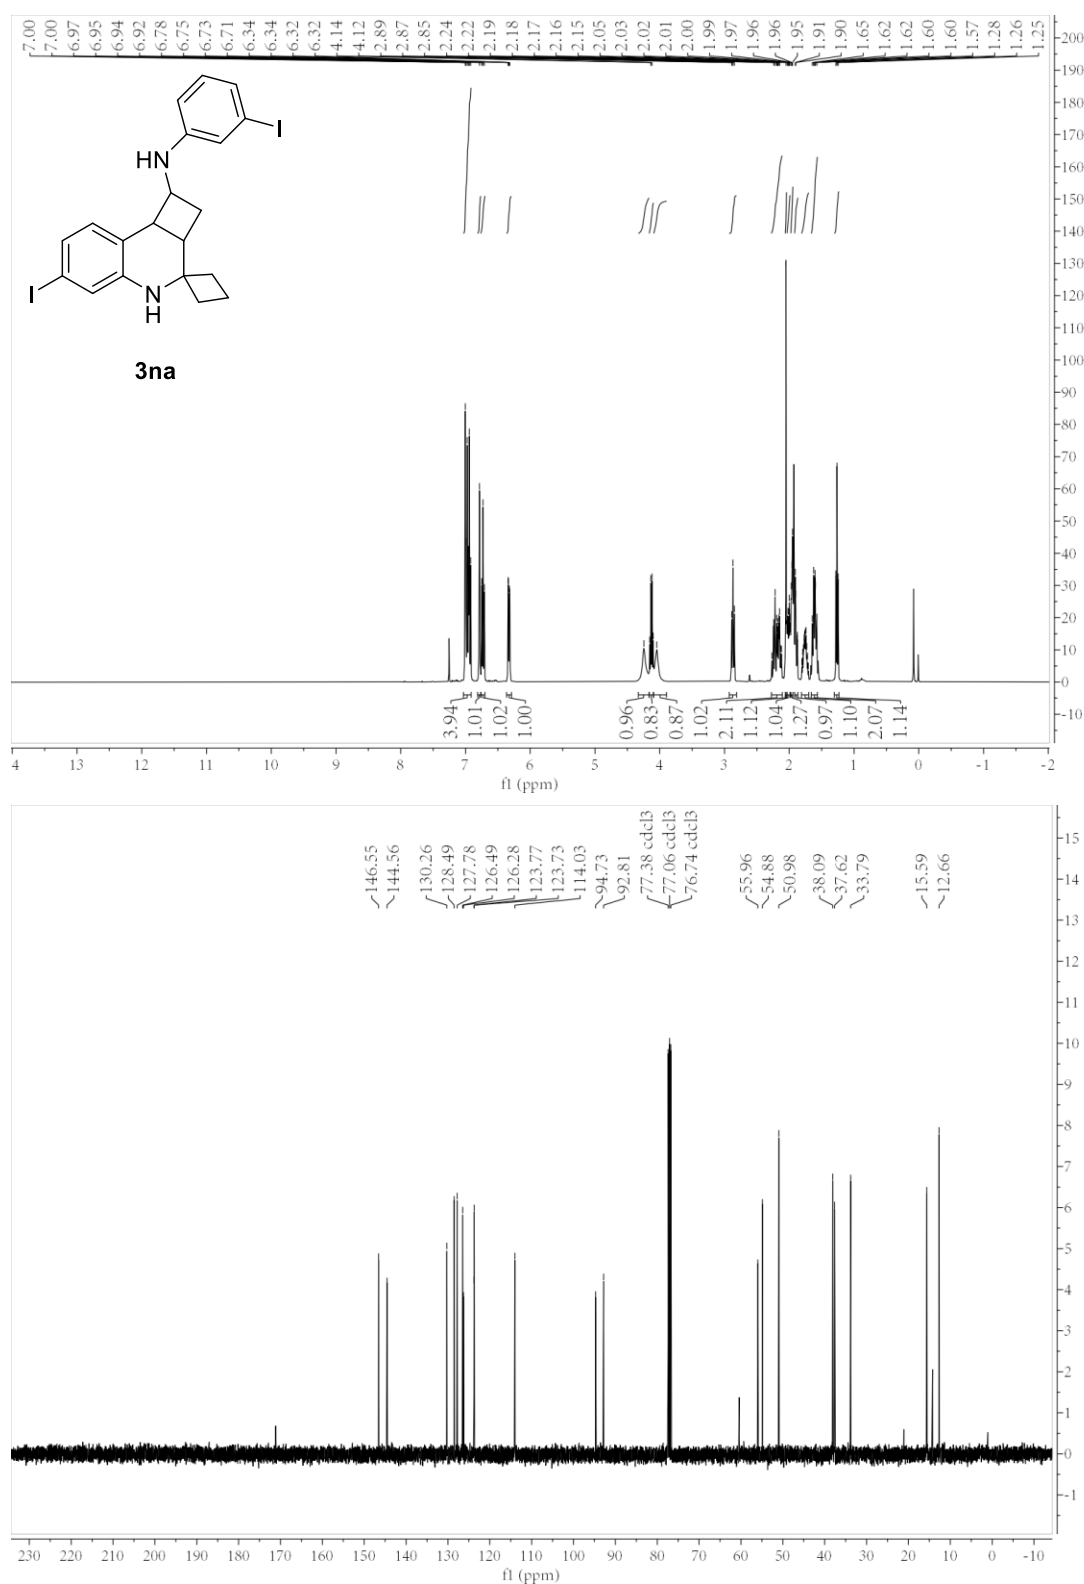

Figure S14. <sup>1</sup>H (400 MHz, CDCl<sub>3</sub>) and <sup>13</sup>C (101 MHz, CDCl<sub>3</sub>) NMR spectra for compound **3na**

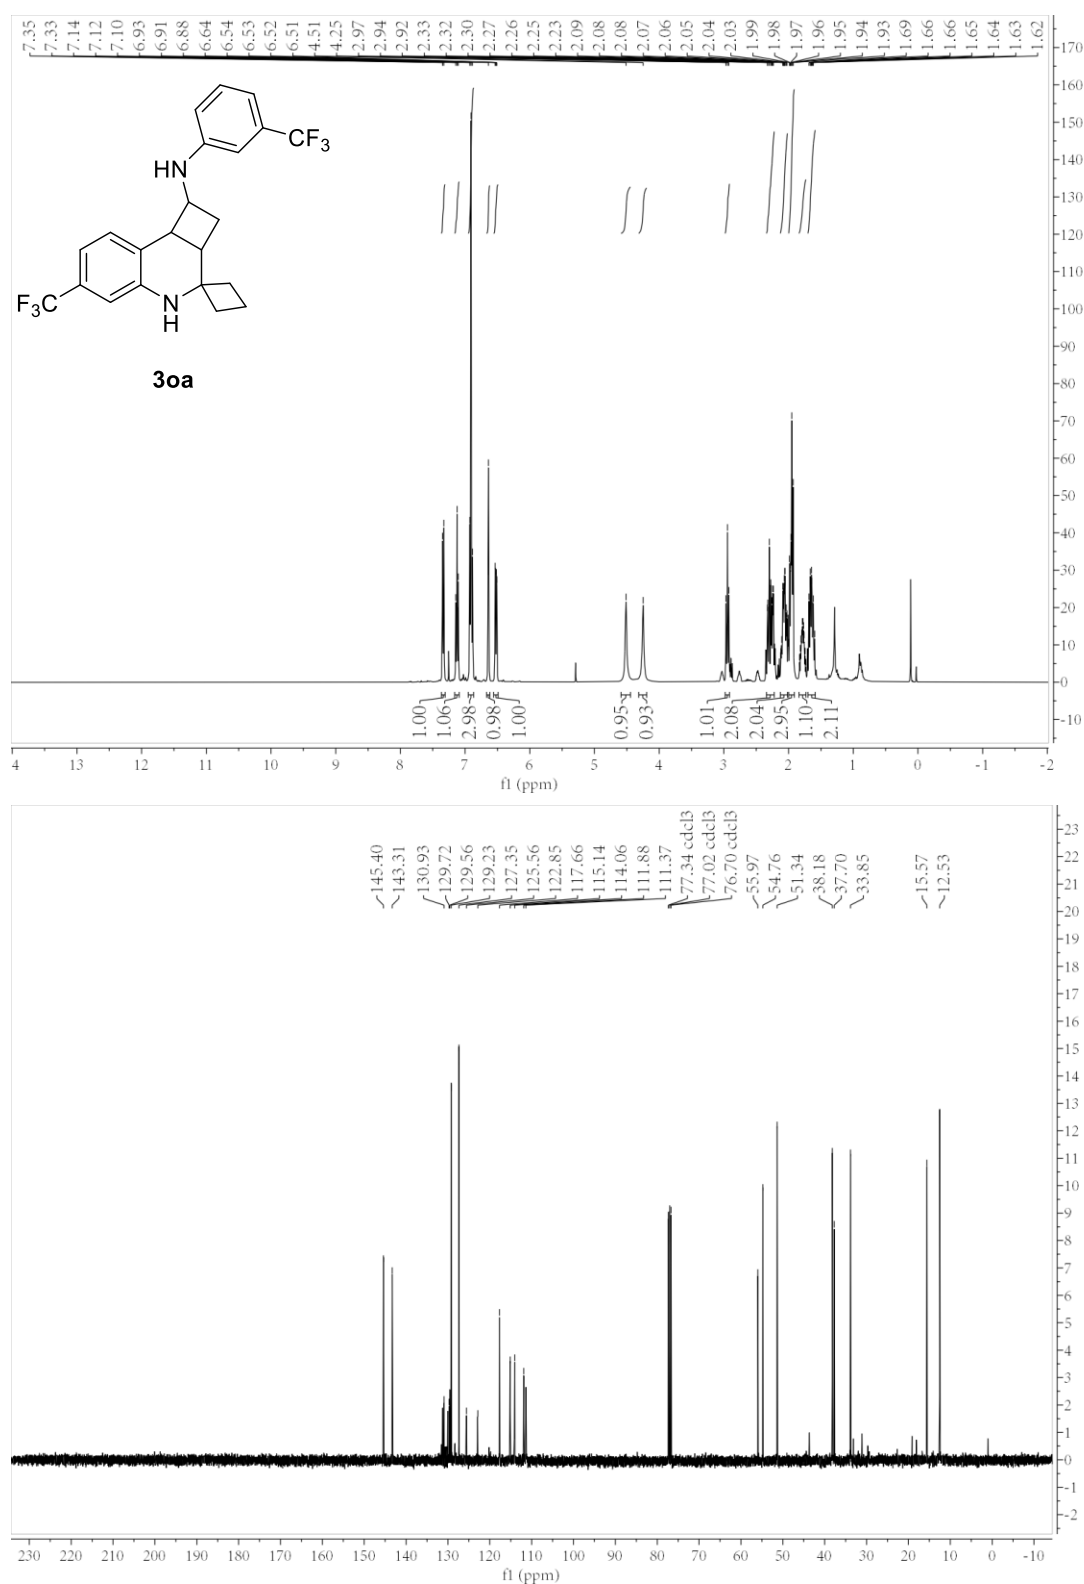

Figure S15. <sup>1</sup>H (400 MHz, CDCl<sub>3</sub>) and <sup>13</sup>C (101 MHz, CDCl<sub>3</sub>) NMR spectra for compound **3oa**

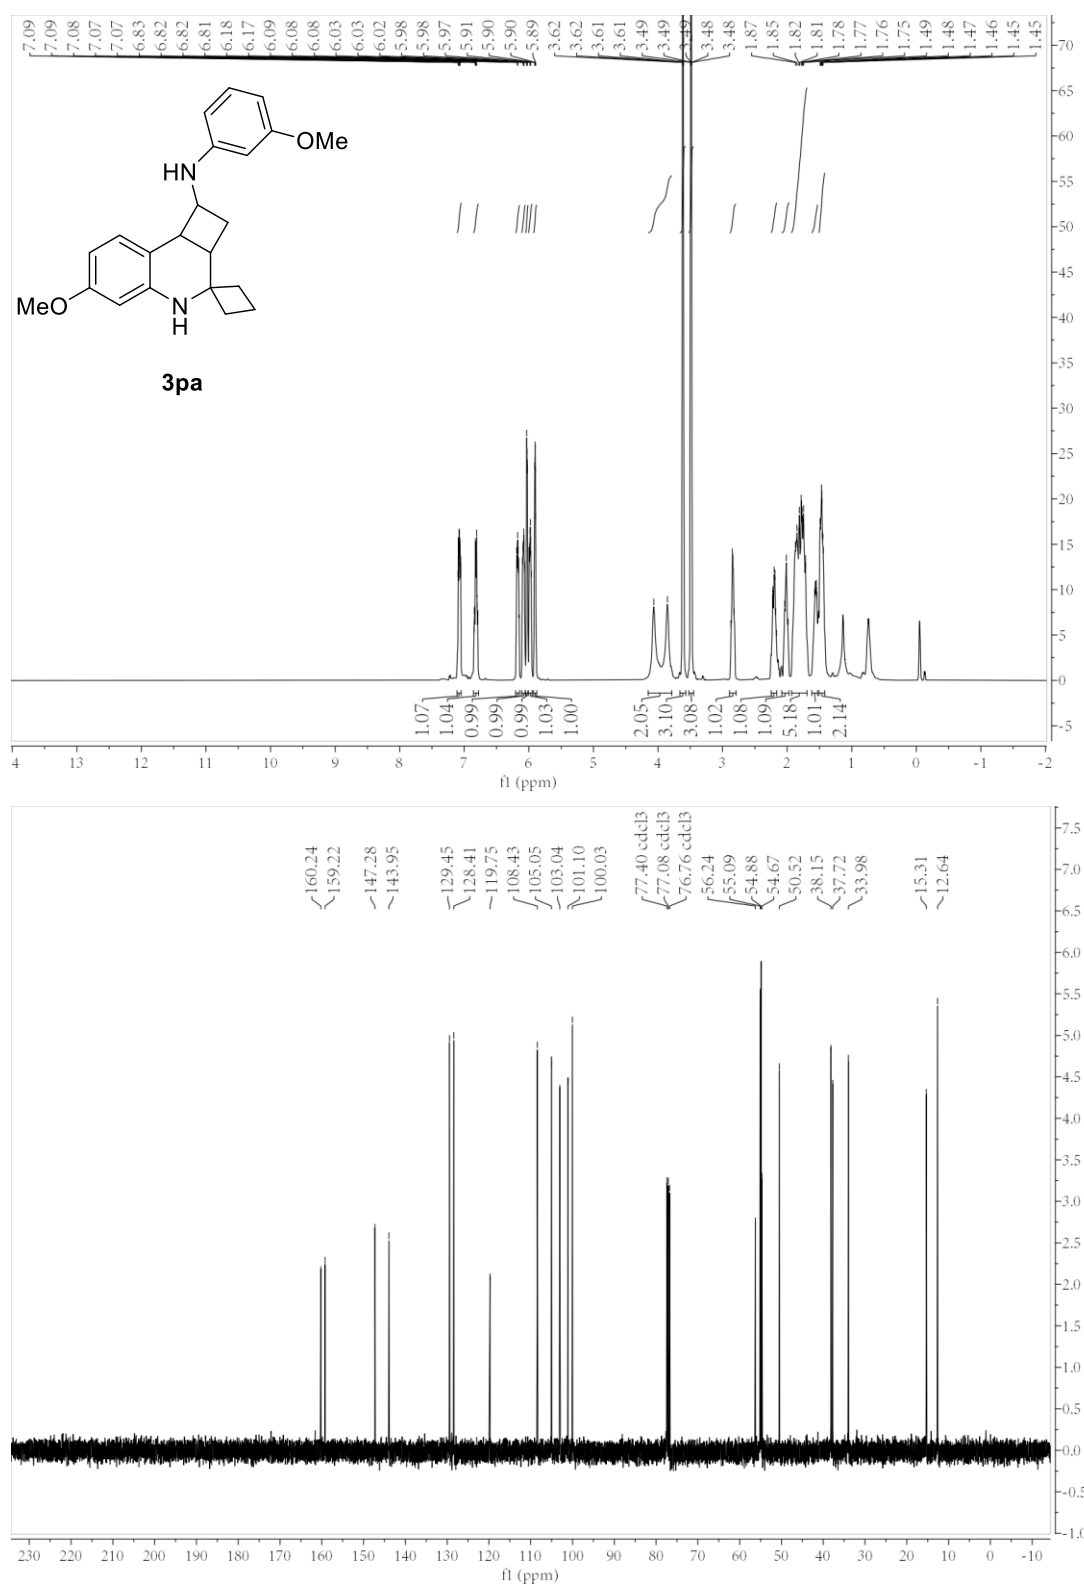

Figure S16. <sup>1</sup>H (400 MHz, CDCl<sub>3</sub>) and <sup>13</sup>C (101 MHz, CDCl<sub>3</sub>) NMR spectra for compound **3pa**

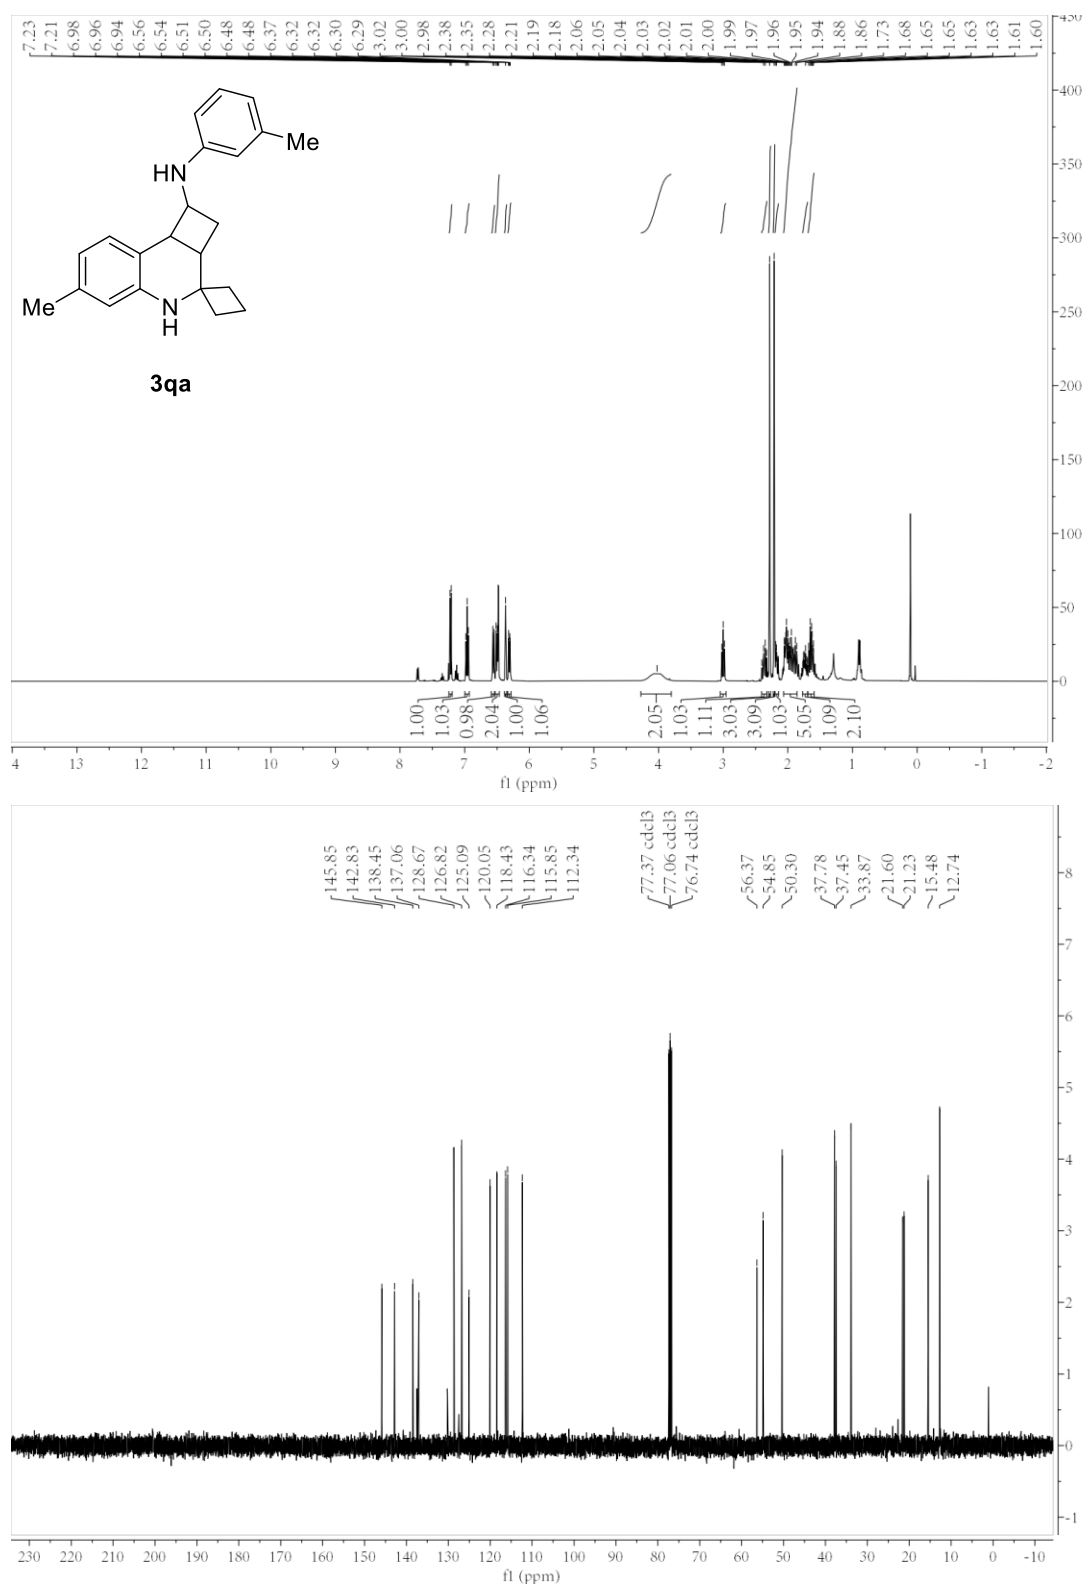

Figure S17. <sup>1</sup>H (400 MHz, CDCl<sub>3</sub>) and <sup>13</sup>C (101 MHz, CDCl<sub>3</sub>) NMR spectra for compound **3qa**

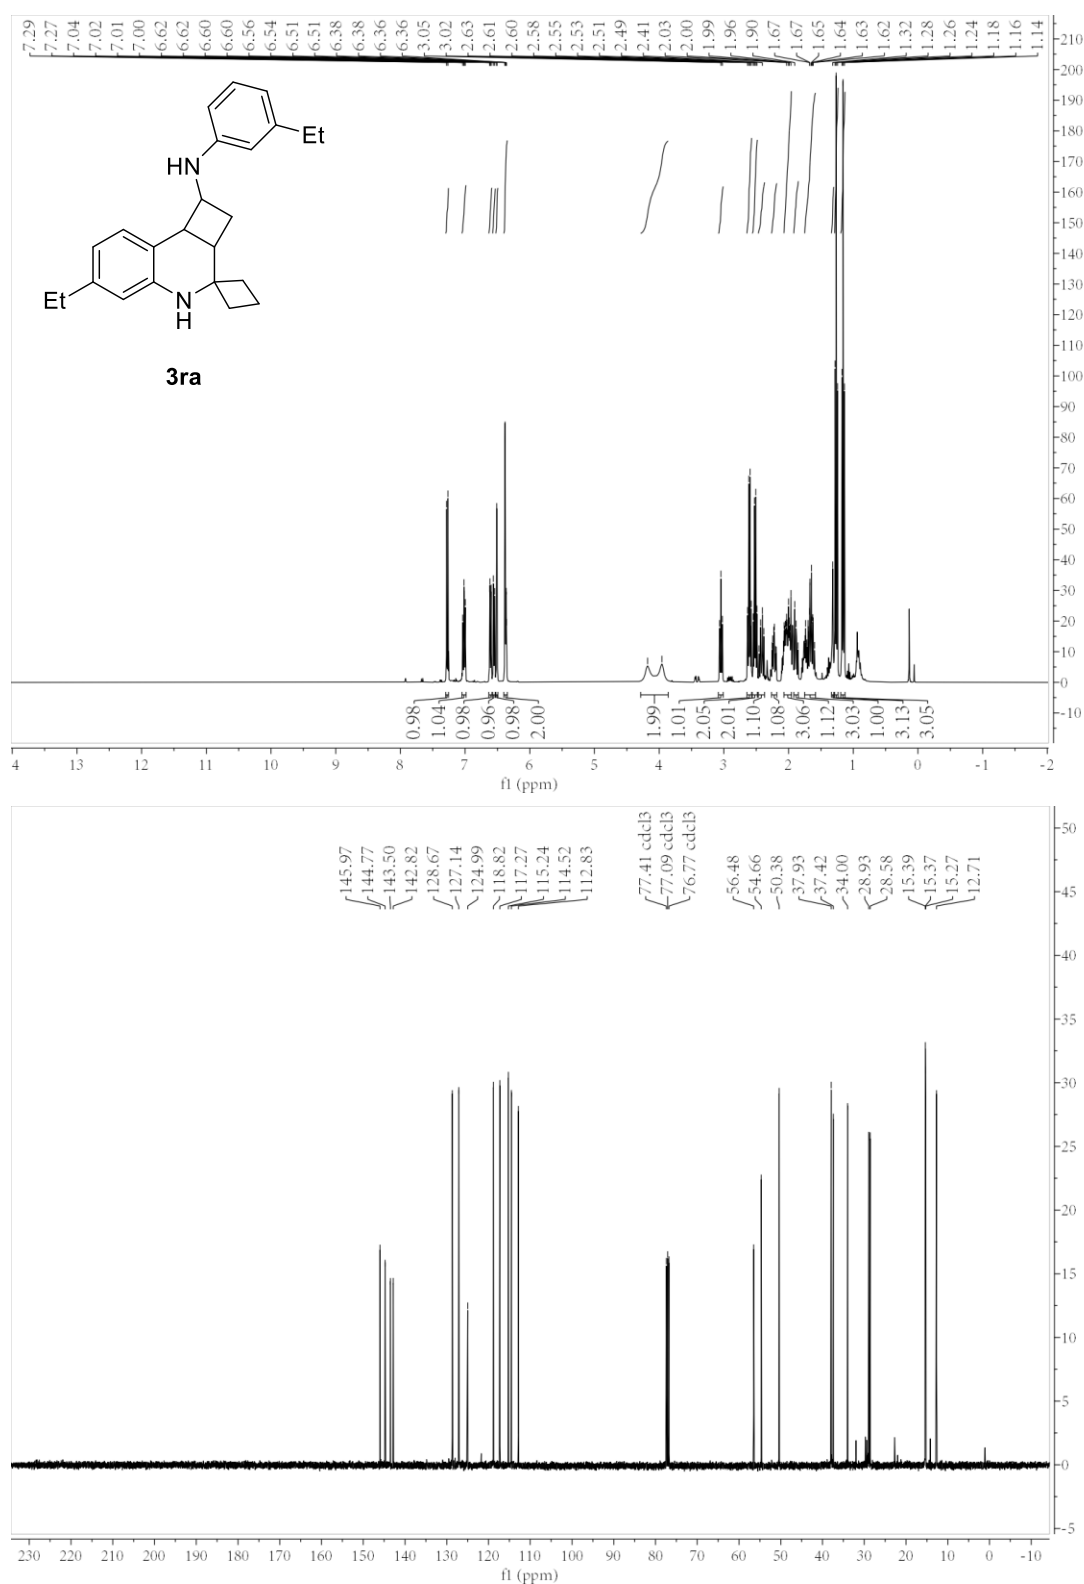

Figure S18. <sup>1</sup>H (400 MHz, CDCl<sub>3</sub>) and <sup>13</sup>C (101 MHz, CDCl<sub>3</sub>) NMR spectra for compound **3ra**



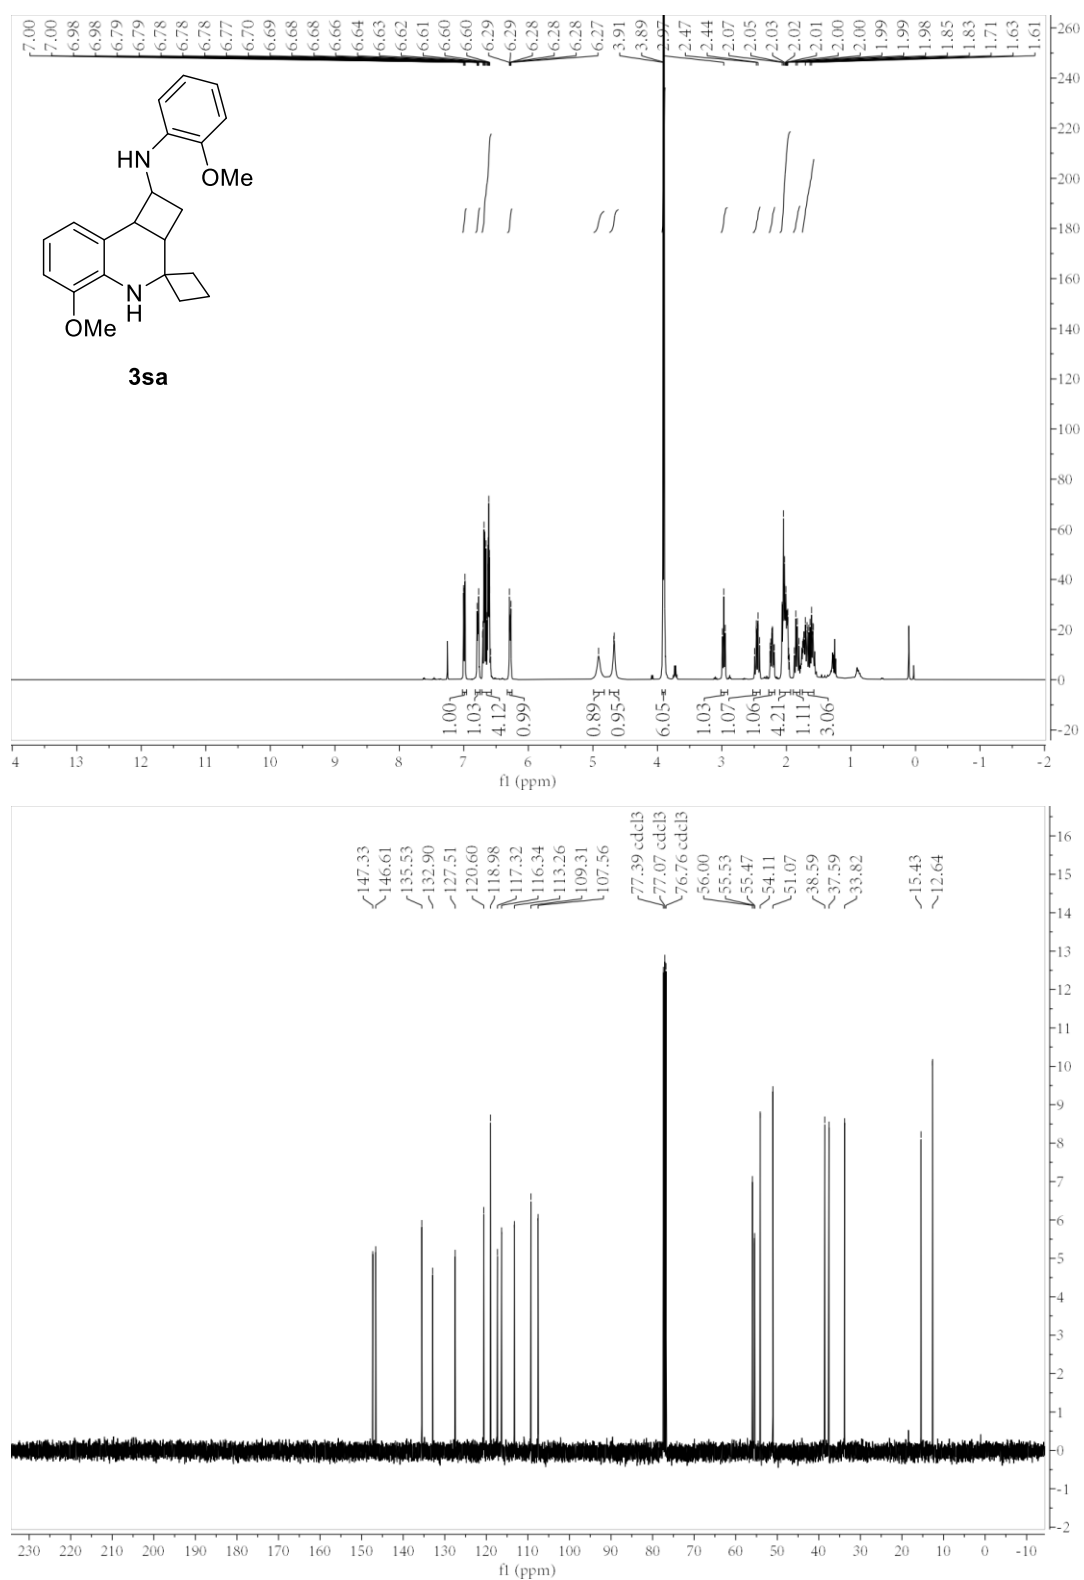

Figure S19. <sup>1</sup>H (400 MHz, CDCl<sub>3</sub>) and <sup>13</sup>C (101 MHz, CDCl<sub>3</sub>) NMR spectra for compound **3sa**

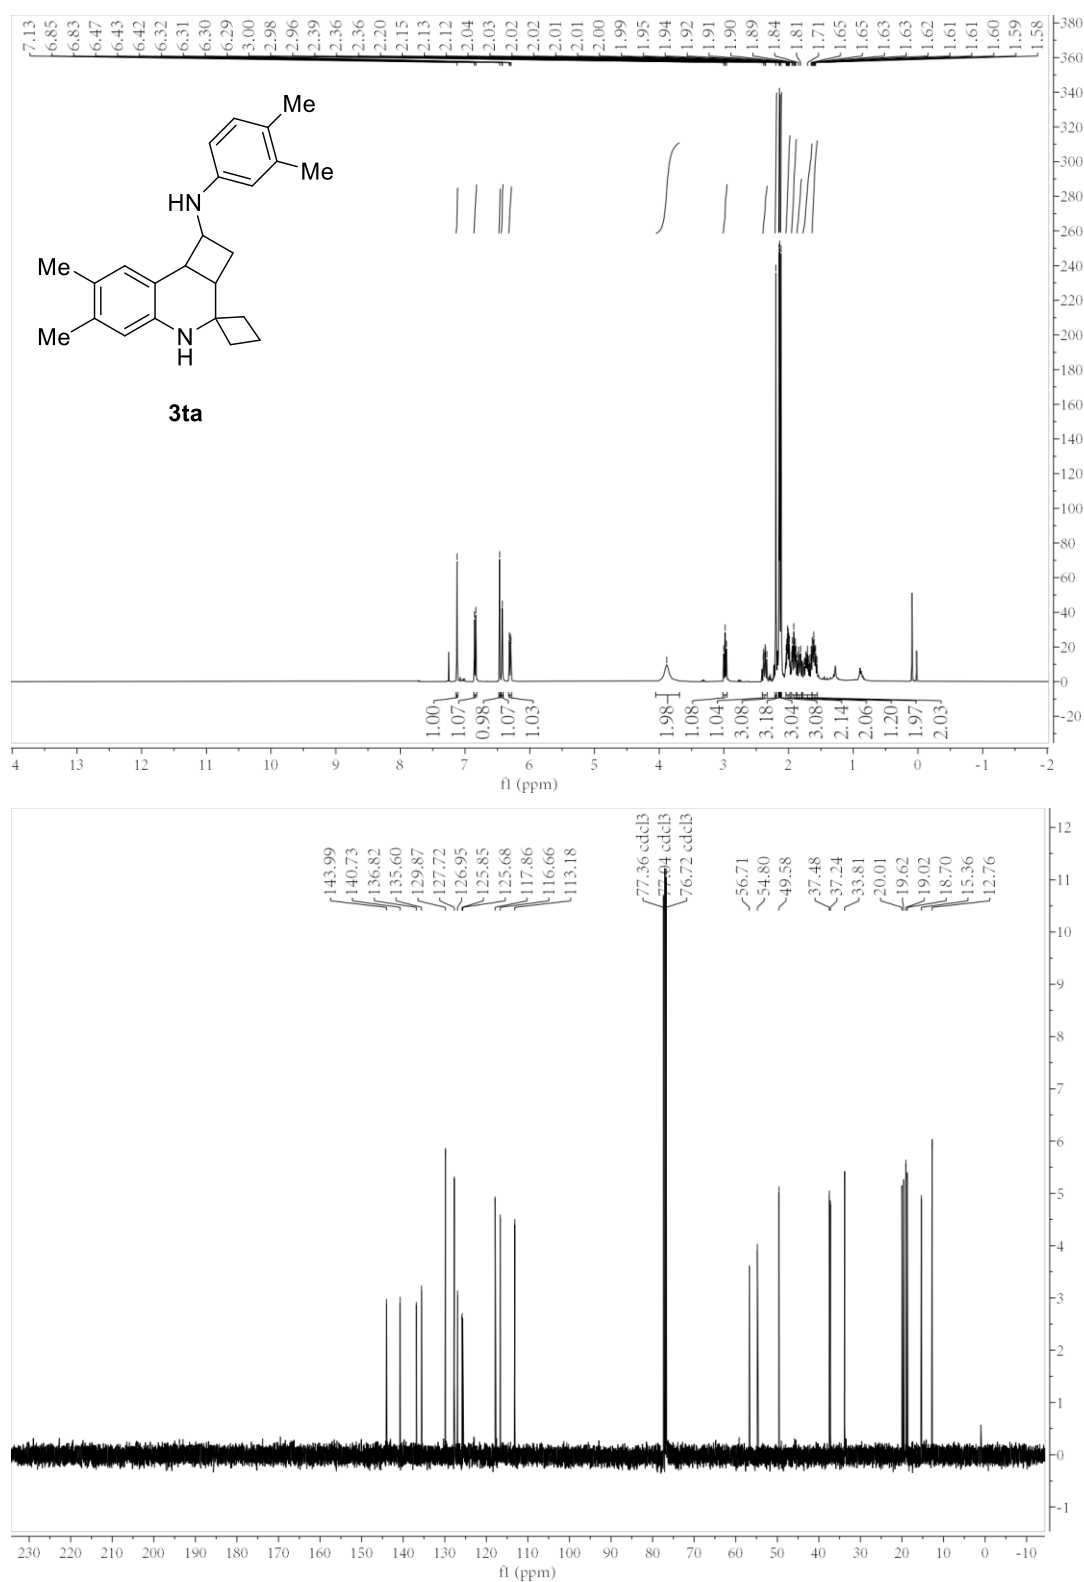

Figure S20. <sup>1</sup>H (400 MHz, CDCl<sub>3</sub>) and <sup>13</sup>C (101 MHz, CDCl<sub>3</sub>) NMR spectra for compound **3ta**

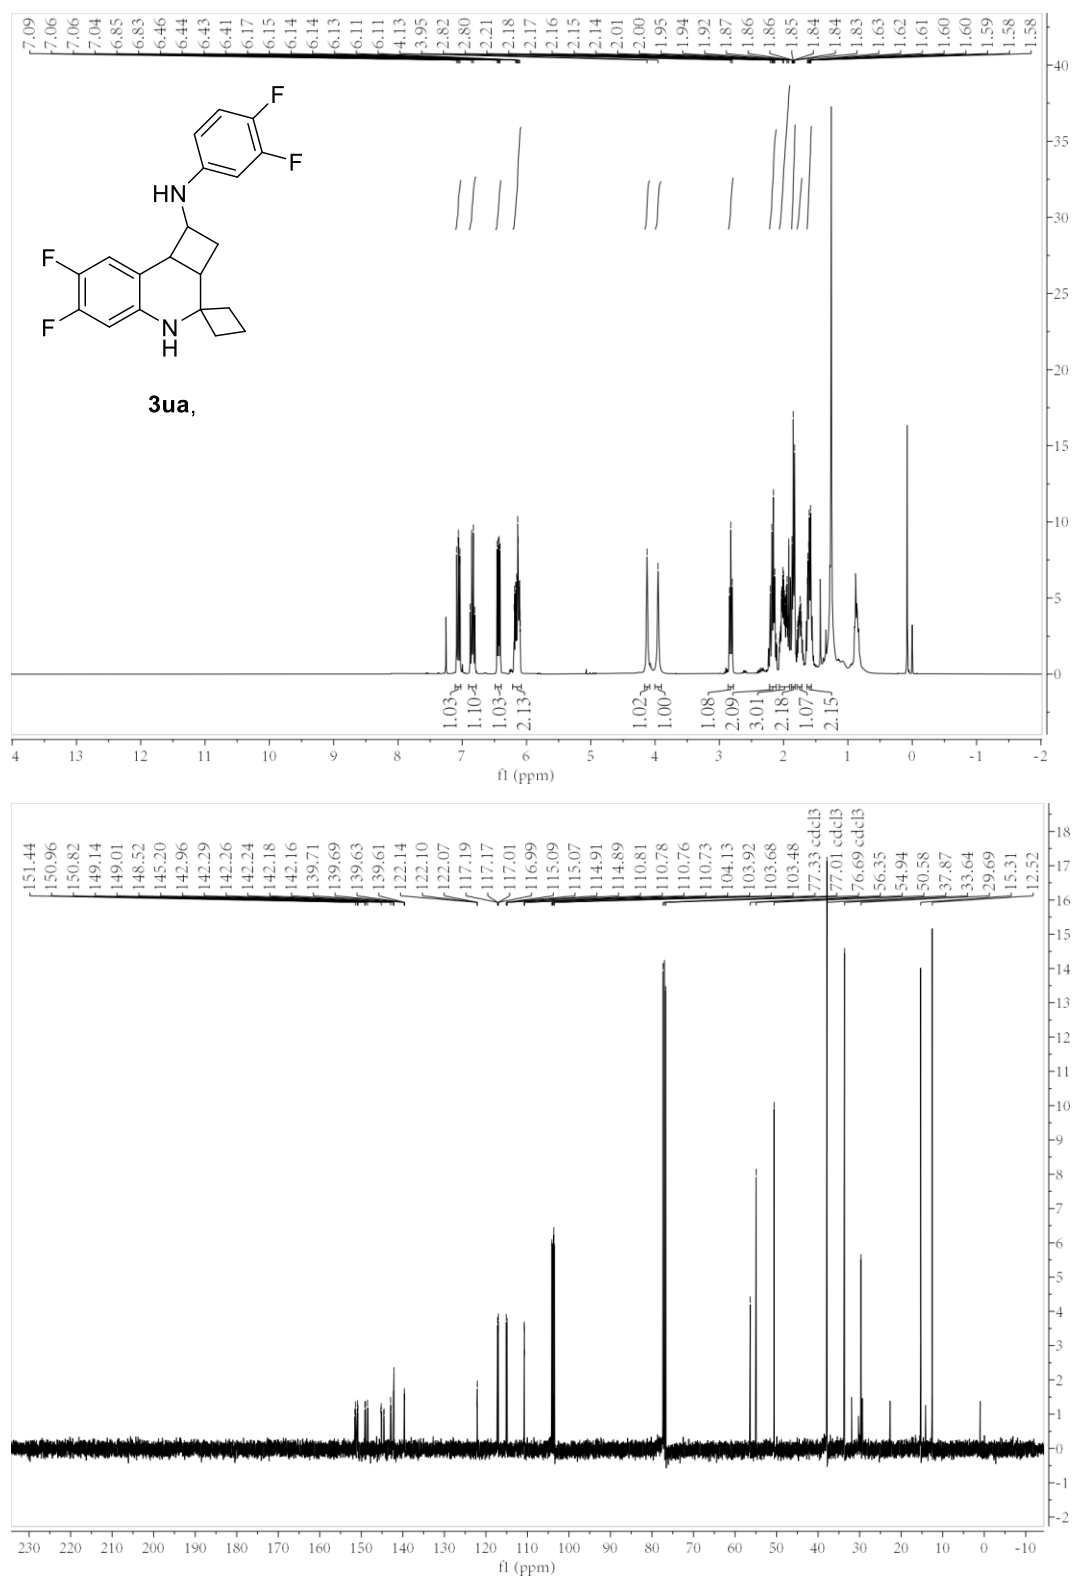

Figure S21. <sup>1</sup>H (400 MHz, CDCl<sub>3</sub>) and <sup>13</sup>C (101 MHz, CDCl<sub>3</sub>) NMR spectra for compound **3ua**

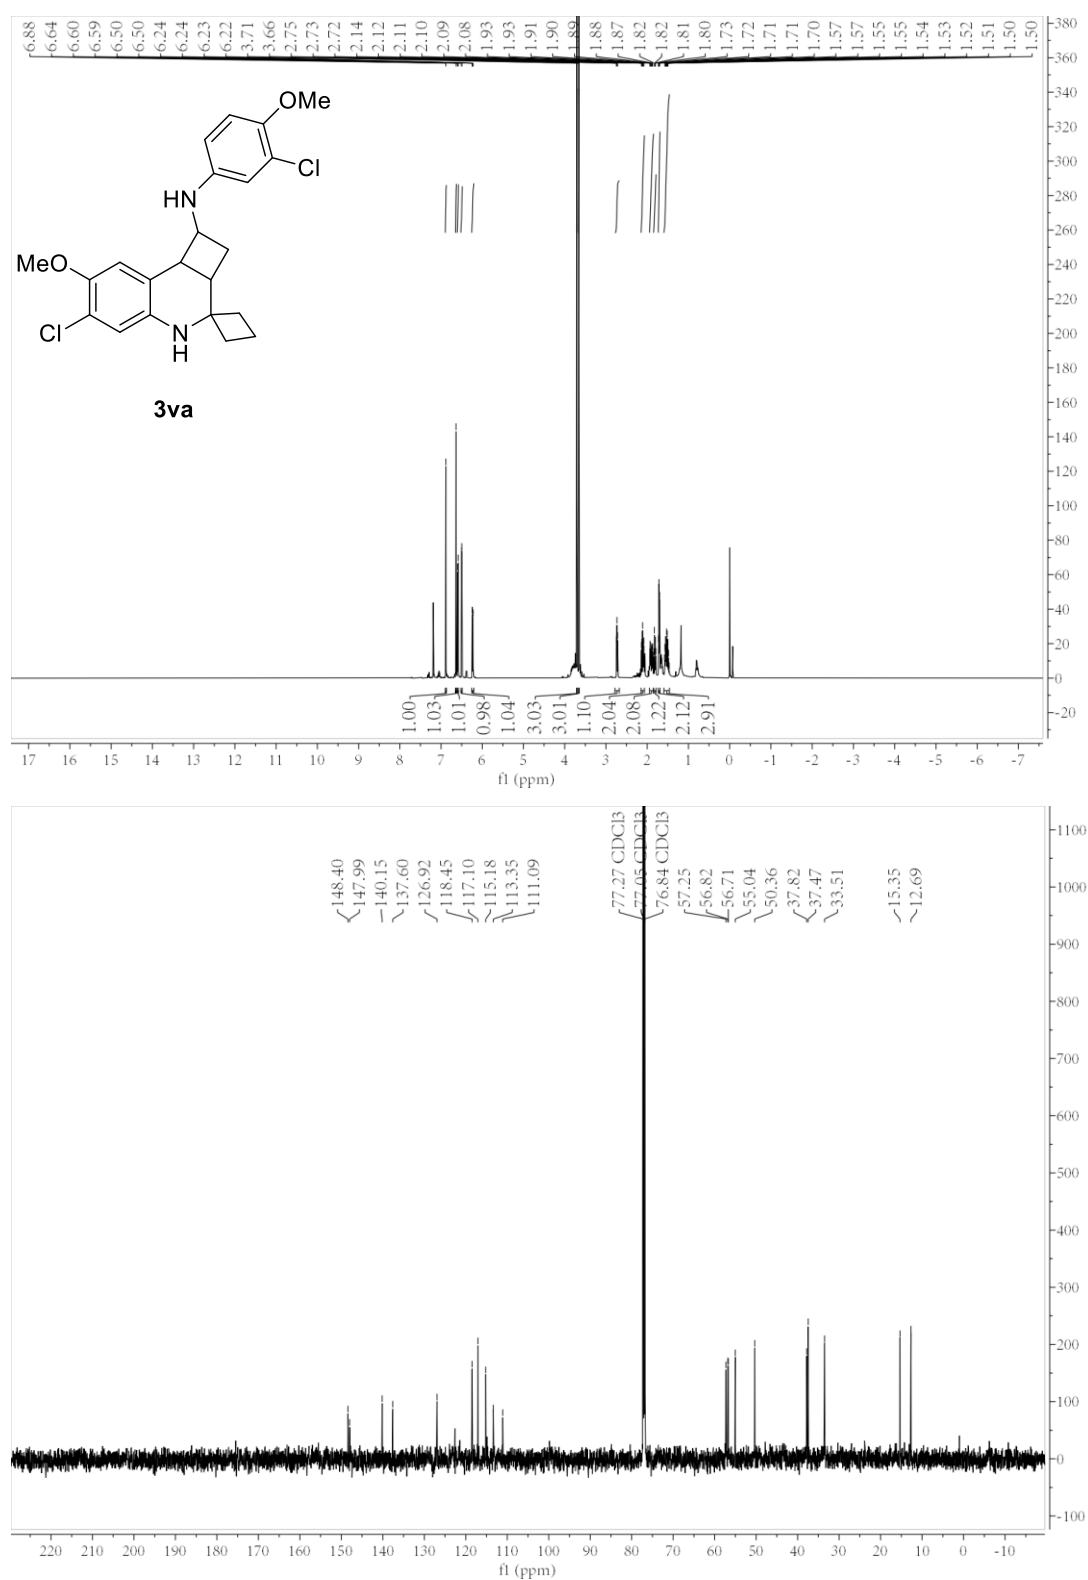

Figure S22. <sup>1</sup>H (400 MHz, CDCl<sub>3</sub>) and <sup>13</sup>C (101 MHz, CDCl<sub>3</sub>) NMR spectra for compound **3va**

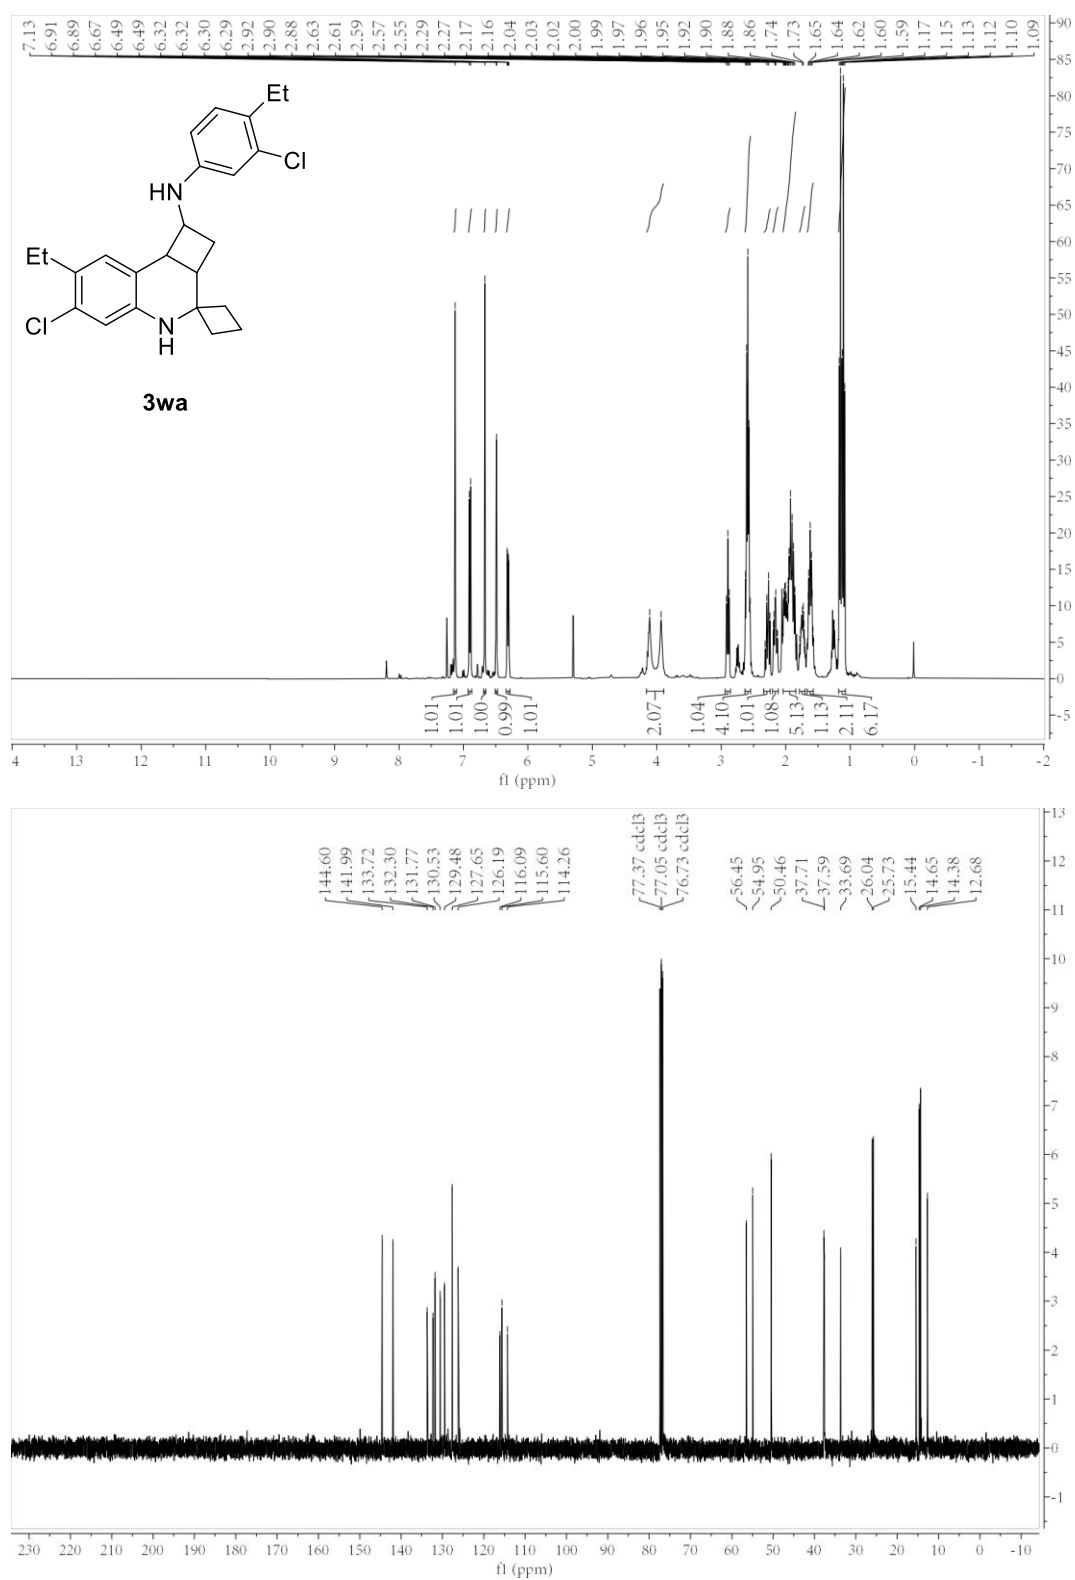

Figure S23. <sup>1</sup>H (400 MHz, CDCl<sub>3</sub>) and <sup>13</sup>C (101 MHz, CDCl<sub>3</sub>) NMR spectra for compound **3wa**

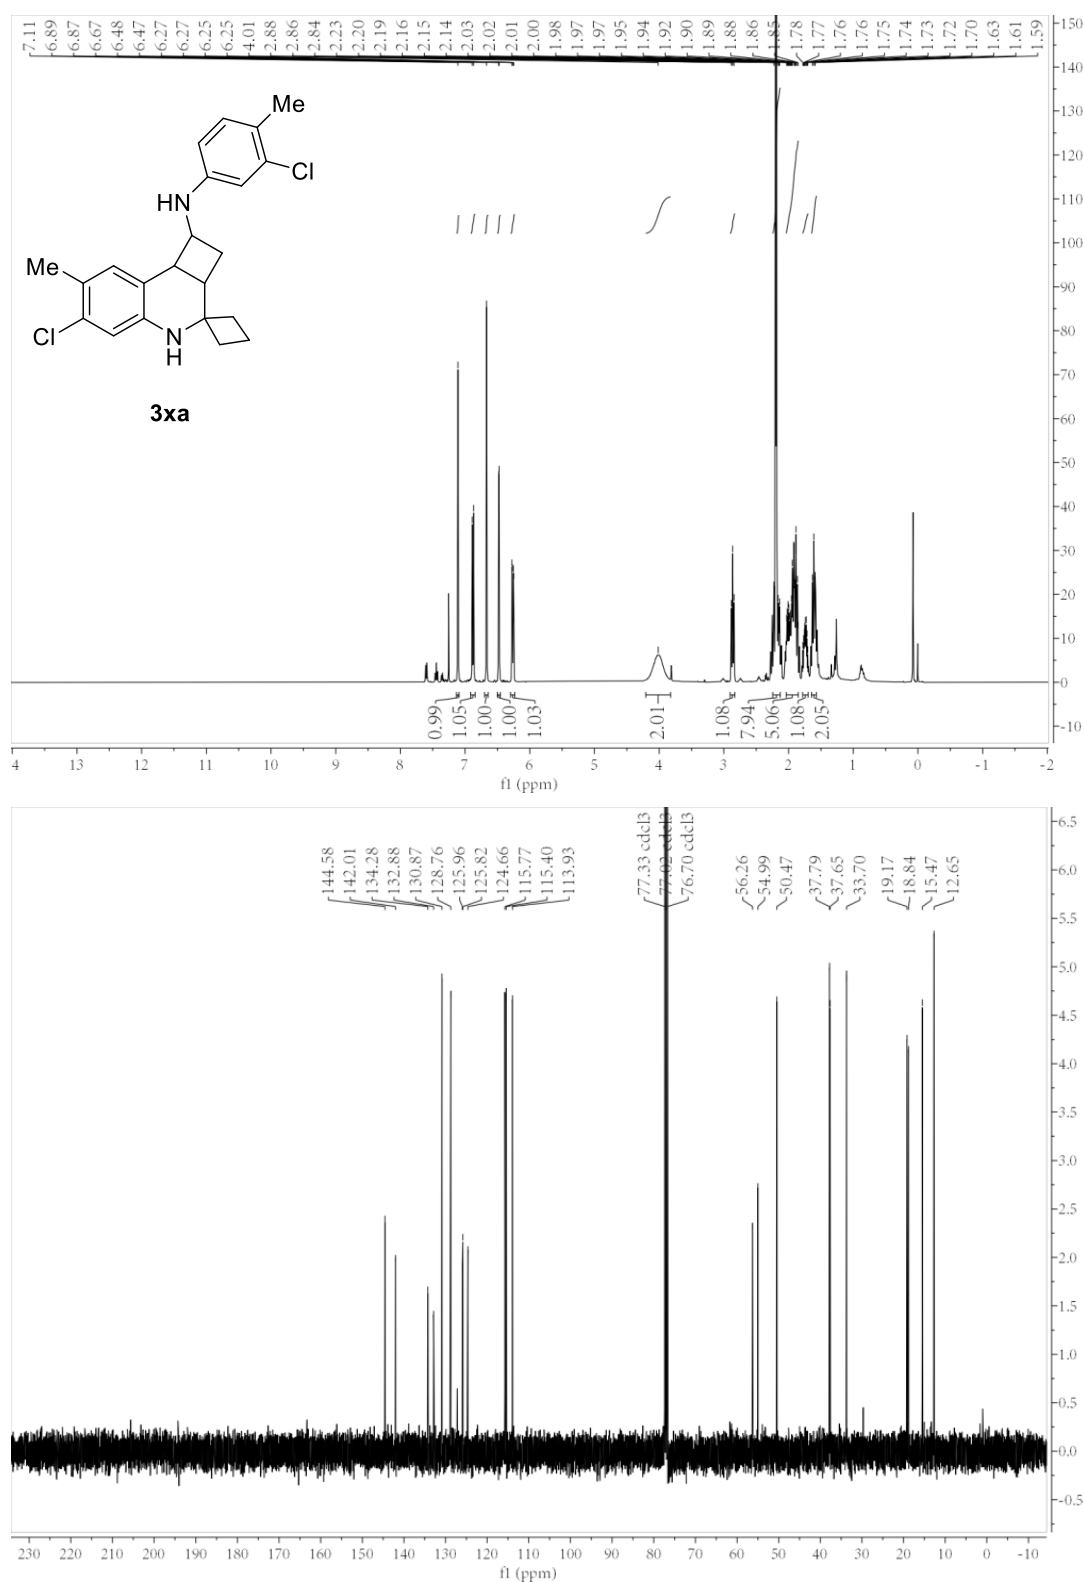

Figure S24. <sup>1</sup>H (400 MHz, CDCl<sub>3</sub>) and <sup>13</sup>C (101 MHz, CDCl<sub>3</sub>) NMR spectra for compound **3xa**

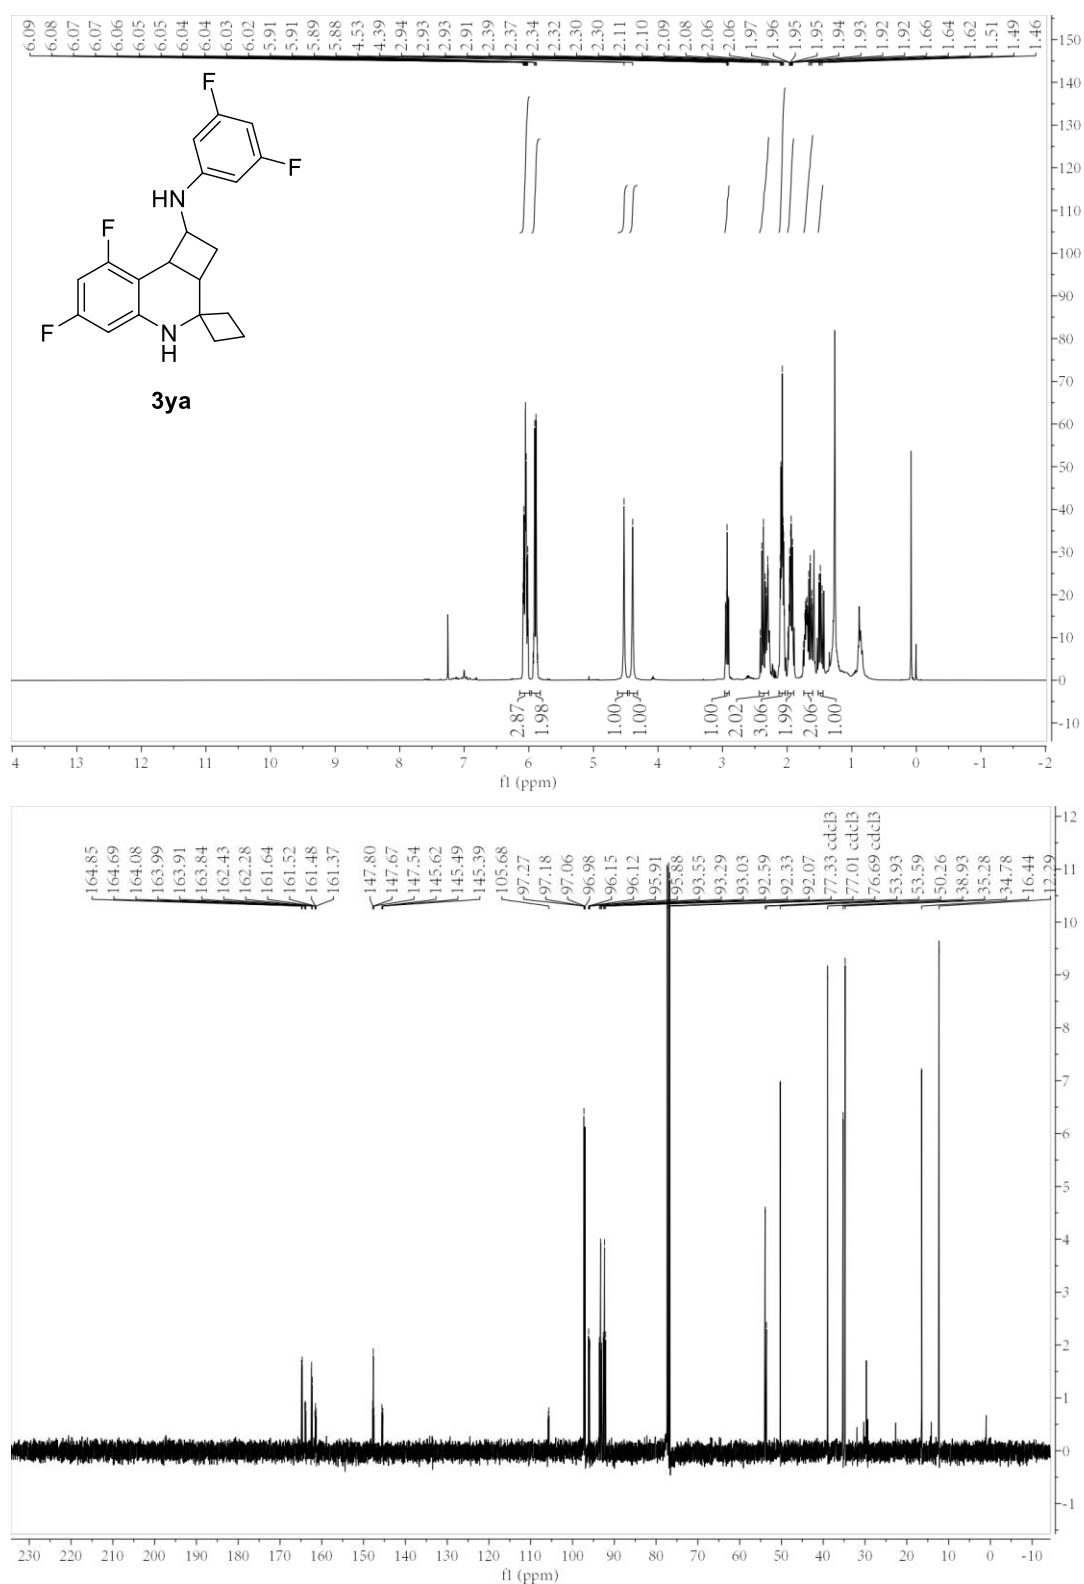

Figure S25. <sup>1</sup>H (400 MHz, CDCl<sub>3</sub>) and <sup>13</sup>C (101 MHz, CDCl<sub>3</sub>) NMR spectra for compound **3ya**

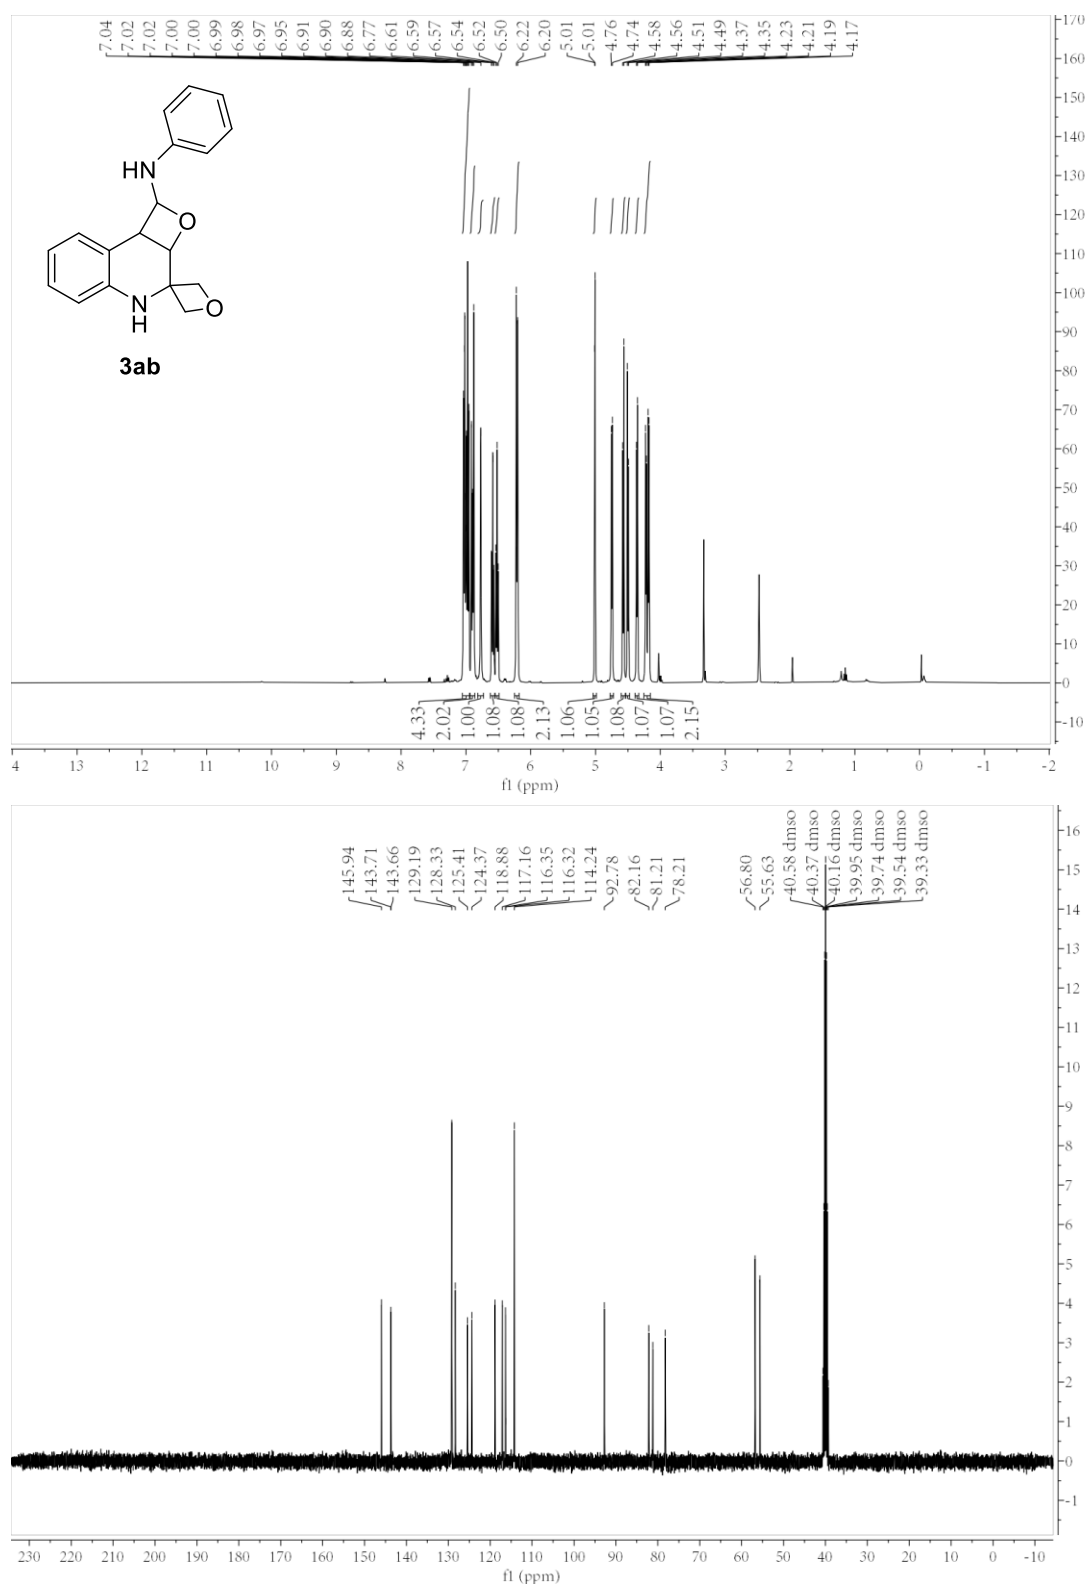

Figure S26. <sup>1</sup>H (400 MHz, DMSO) and <sup>13</sup>C (101 MHz, DMSO) NMR spectra for compound **3ab**



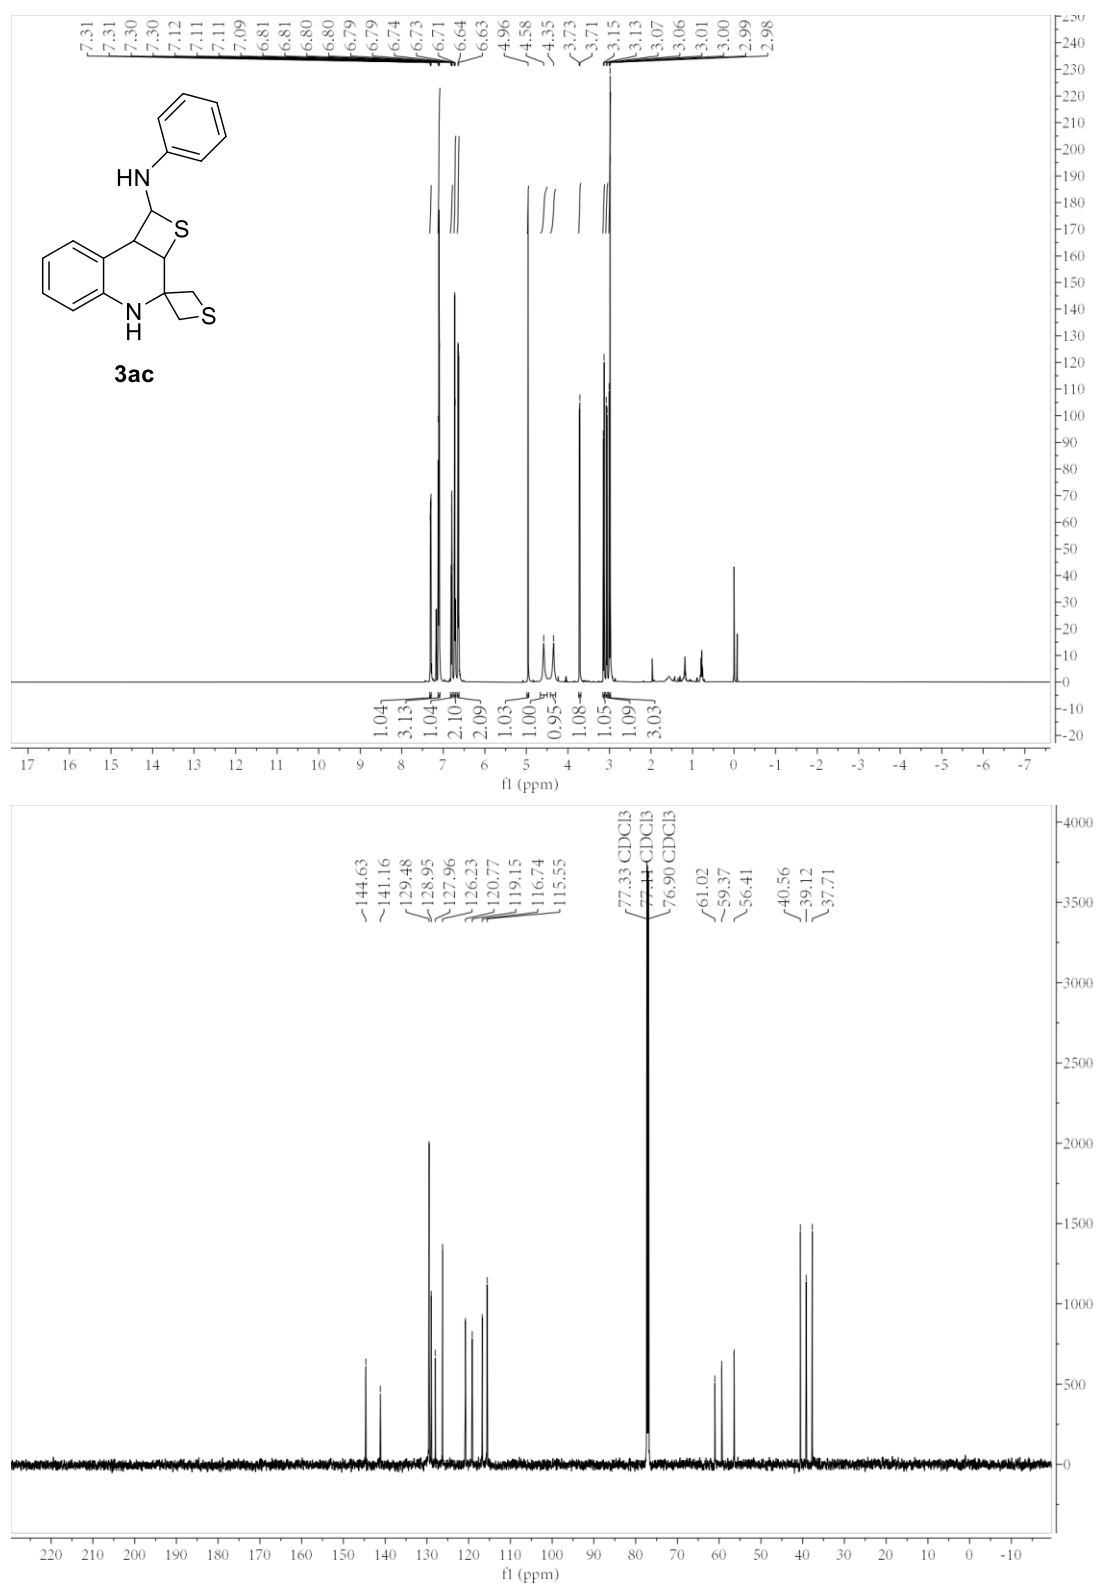

Figure S27. <sup>1</sup>H (400 MHz, CDCl<sub>3</sub>) and <sup>13</sup>C (101 MHz, CDCl<sub>3</sub>) NMR spectra for compound **3ac**

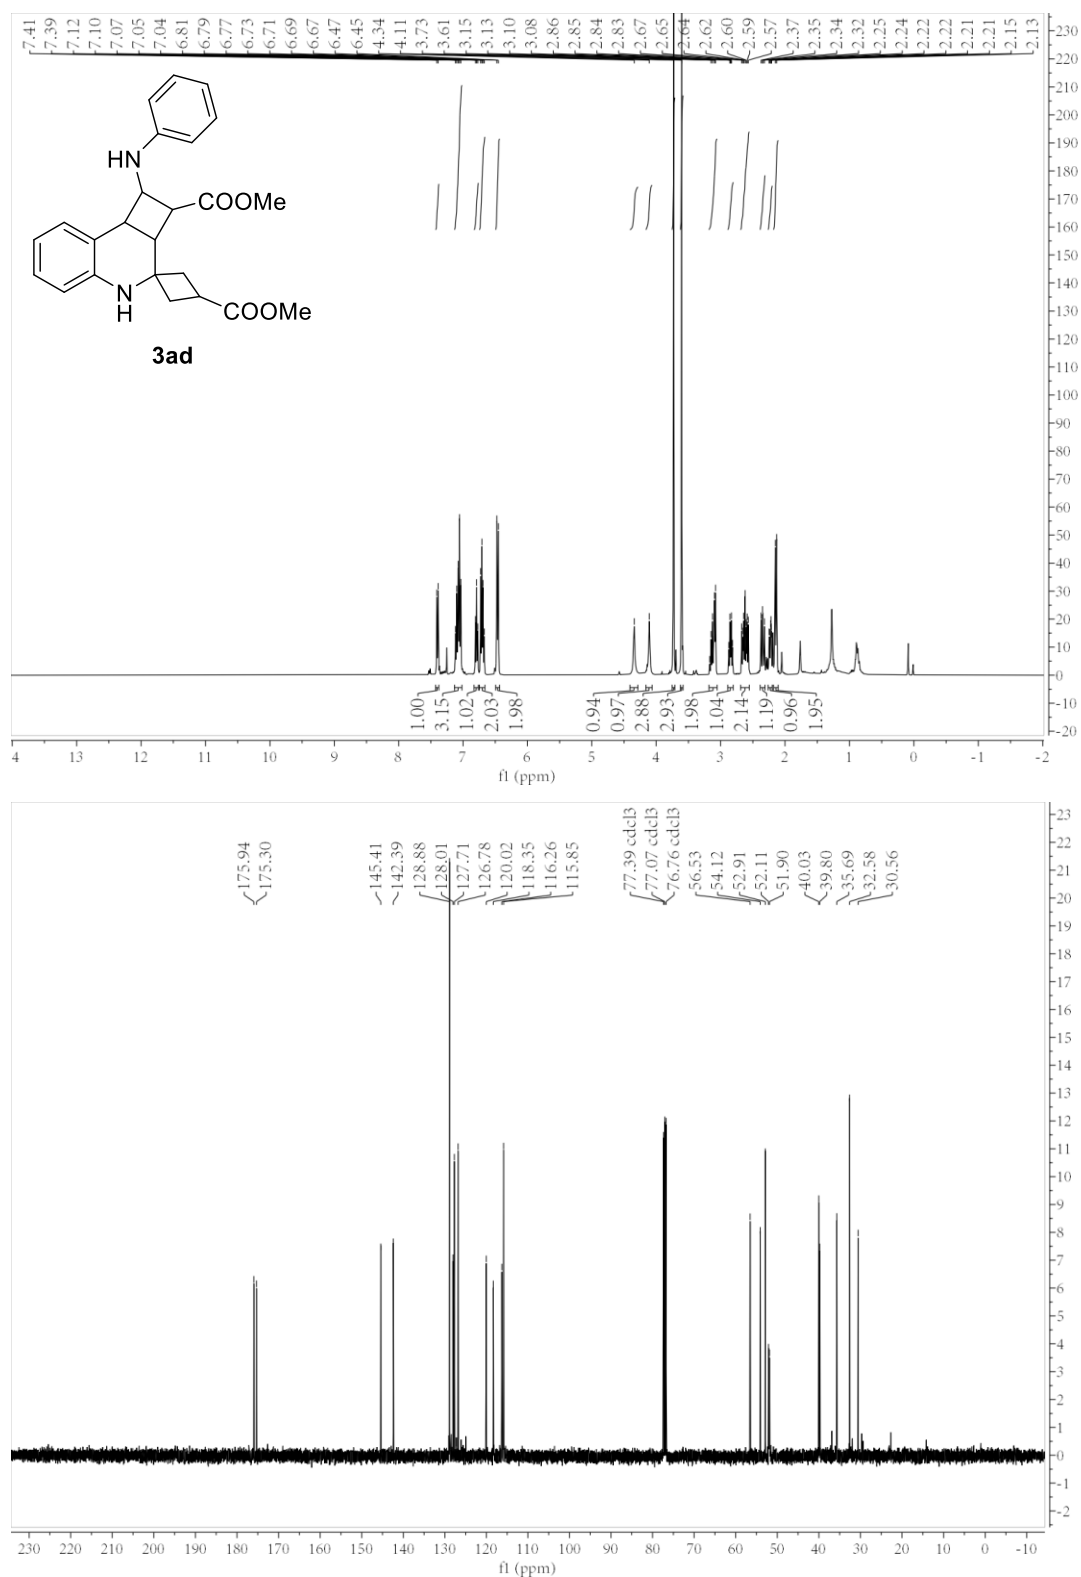

Figure S28. <sup>1</sup>H (400 MHz, CDCl<sub>3</sub>) and <sup>13</sup>C (101 MHz, CDCl<sub>3</sub>) NMR spectra for compound **3ad**

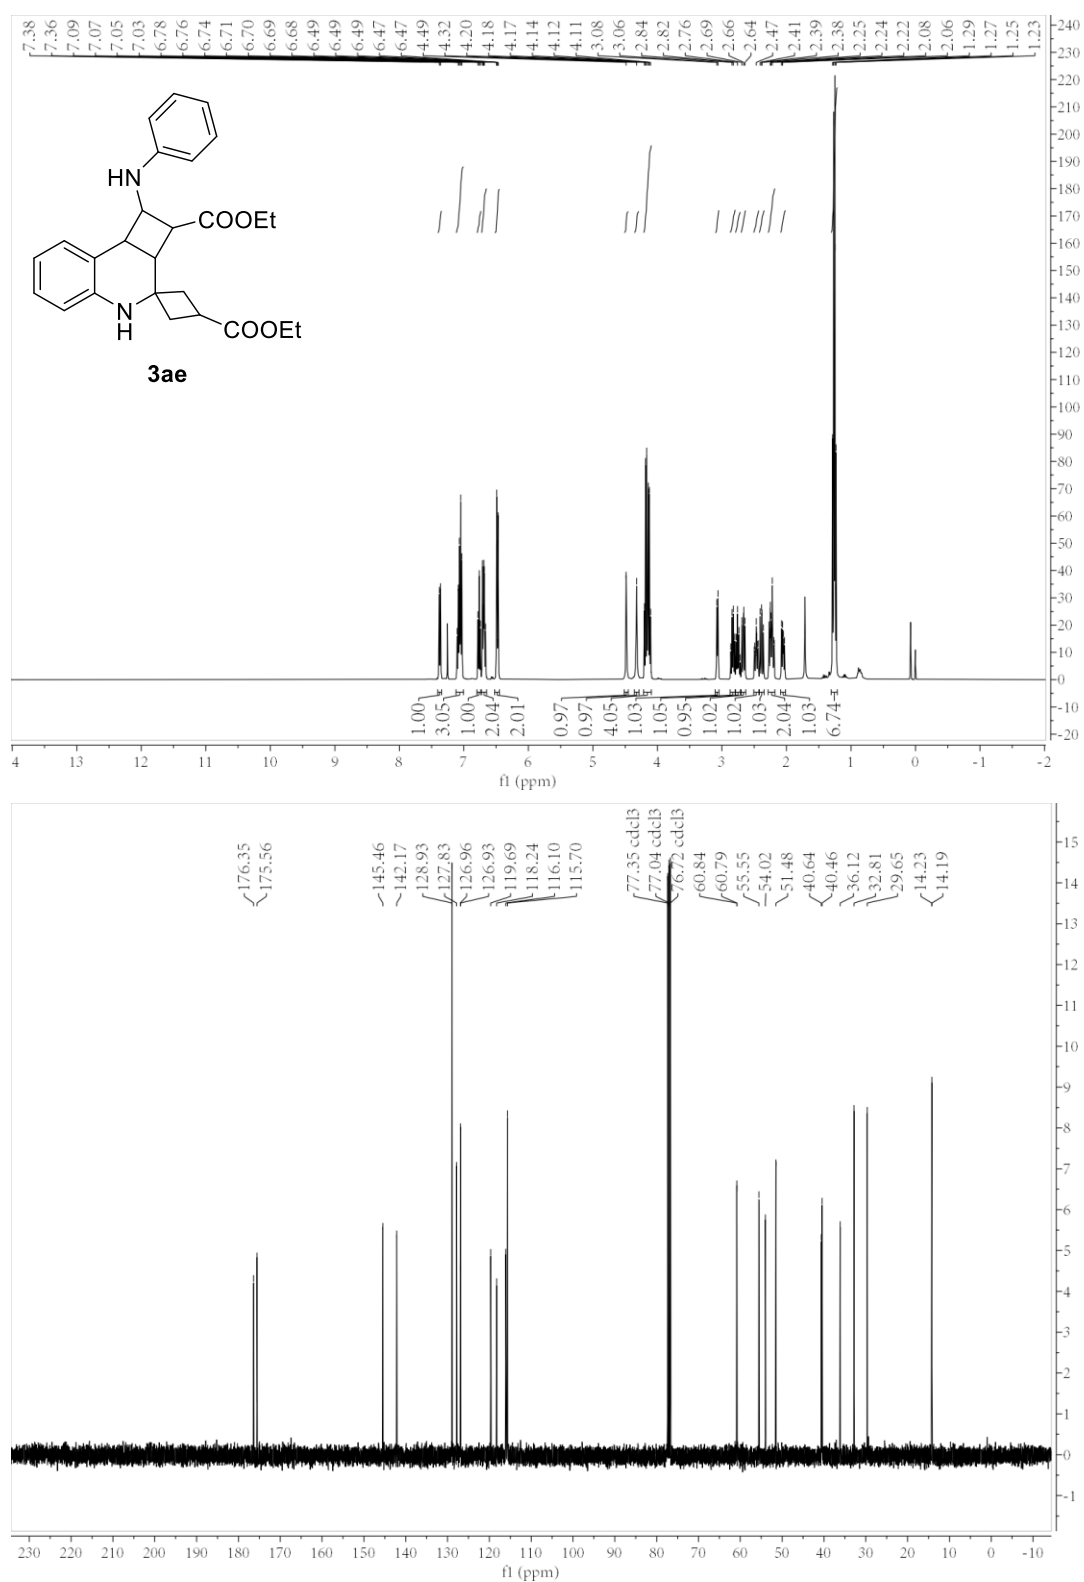

Figure S28. <sup>1</sup>H (400 MHz, CDCl<sub>3</sub>) and <sup>13</sup>C (101 MHz, CDCl<sub>3</sub>) NMR spectra for compound **3ad**
